# Supplementary material for: High-throughput computational discovery of 3218 ultralow thermal conductivity and dynamically stable materials by dual machine learning models
Source: Royal Society of Chemistry journal article supplement (doi:10.1039/d3ta04874h), 2023-01-01
Supplement: d3ta04874h1.xlsx [file d3ta04874h1.xlsx]

## Sheet: Classification_Models_8077
OQMD_ID	Formula	Space_Group_Number	Number of Atoms	Phonon_Dispersions
3075	Al2ZnS4	227	56	Positive
4171	MgAl2O4	227	56	Positive
4643	Al2ZnO4	227	56	Positive
5215	Zr2CuS4	227	56	Positive
5621	Ag2MoO4	227	56	Positive
5648	Cd(RhO2)2	227	56	Positive
5774	CaAl2	227	24	Positive
6015	MgAl2O4	227	56	Positive
6920	Mg(ScS2)2	227	56	Positive
6921	Sc2MnS4	227	56	Positive
8437	Na2MoO4	227	56	Positive
10095	Zr(TiH2)2	227	56	Positive
10353	Be2Ag	227	24	Positive
10390	BaAl2	227	24	Positive
10541	ScAl2	227	24	Positive
10584	SrAl2	227	24	Positive
10612	YAl2	227	24	Positive
10659	NaAg2	227	24	Positive
10858	BaPd2	227	24	Positive
10861	BaPt2	227	24	Positive
10880	Be2Cu	227	24	Positive
10890	Be2Nb	227	24	Positive
10904	TaBe2	227	24	Positive
10907	TiBe2	227	24	Positive
11001	CaPd2	227	24	Positive
13324	Sc2MnSe4	227	56	Positive
13656	Y2MgSe4	227	56	Positive
17365	HfMo2	227	24	Positive
17395	HfZn2	227	24	Positive
17537	YIr2	227	24	Positive
17601	LiPt2	227	24	Positive
17718	ZrMo2	227	24	Positive
17730	NaPt2	227	24	Positive
17854	YNi2	227	24	Positive
17961	SrPd2	227	24	Positive
18065	SrRh2	227	24	Positive
18084	YRh2	227	24	Positive
18146	TaV2	227	24	Positive
18188	ZrZn2	227	24	Positive
18299	TaCr2	227	24	Positive
18333	ScFe2	227	24	Positive
18350	ZrFe2	227	24	Positive
18443	ZrCr2	227	24	Positive
18740	NaAu2	227	24	Positive
18766	CaRh2	227	24	Positive
18768	CaPt2	227	24	Positive
18769	SrPt2	227	24	Positive
18770	BaRh2	227	24	Positive
19123	Zn(RhO2)2	227	56	Positive
19124	Mn(RhO2)2	227	56	Positive
19125	Co(RhO2)2	227	56	Positive
19373	NbCr2	227	24	Positive
19393	ScCo2	227	24	Positive
19394	YCo2	227	24	Positive
23285	ZrMn2	227	24	Positive
24730	Li2ZnCl4	227	56	Positive
25758	Li2Ca	227	24	Positive
27883	Mn(AlS2)2	227	56	Positive
29028	Y2CdS4	227	56	Positive
29032	Y2CdSe4	227	56	Positive
29360	HfCo2	227	24	Positive
29553	HfCr2	227	24	Positive
29601	TiCr2	227	24	Positive
30206	HfFe2	227	24	Positive
30721	Mg(RhO2)2	227	56	Positive
30725	Mg(ScSe2)2	227	56	Positive
31202	ZrCo2	227	24	Positive
431592	Ag(PdO2)2	227	56	Positive
431670	Al(RuO2)2	227	56	Positive
431723	Na2AsO4	227	56	Positive
431958	BaY2O4	227	56	Positive
432150	CaY2O4	227	56	Positive
432196	Sc2CdO4	227	56	Positive
433138	K(RhO2)2	227	56	Positive
433216	Li(PdO2)2	227	56	Positive
433245	LiZr2O4	227	56	Positive
433379	Rb2MoO4	227	56	Positive
433431	NaTi2O4	227	56	Positive
433586	Rb2OsO4	227	56	Positive
433998	SrY2O4	227	56	Positive
434096	Zr2VO4	227	56	Positive
646874	BiAu2	227	24	Positive
647015	Cd(InSe2)2	227	56	Positive
647551	KBi2	227	24	Positive
647552	RbBi2	227	24	Positive
647553	CsBi2	227	24	Positive
673103	LiTi2O4	227	56	Positive
675547	Mn(GaO2)2	227	56	Positive
685941	MnAl2O4	227	56	Positive
695393	NaTi2O4	227	56	Positive
1235122	LiTi2O4	227	56	Positive
1236381	BeTl2	227	24	Positive
1236460	I2O	227	24	Positive
1236512	SrH2	227	24	Positive
1236517	TcN2	227	24	Positive
1236622	Li2S	227	24	Positive
1236824	NbN2	227	24	Positive
1237517	SI2	227	24	Positive
1237912	ZrN2	227	24	Positive
1238375	SeI2	227	24	Positive
1238942	FeN2	227	24	Positive
1239579	KBr2	227	24	Positive
1241594	RbBr2	227	24	Positive
1250495	Sc2SnSe4	227	56	Positive
1250500	Y2MnSe4	227	56	Positive
1250504	Sc2ZnSe4	227	56	Positive
1250513	Y2PbSe4	227	56	Positive
1250548	K(YSe2)2	227	56	Positive
1250555	Y2GeSe4	227	56	Positive
1250556	Y2HgSe4	227	56	Positive
1250557	Y2SnSe4	227	56	Positive
1250565	Y2Te4Pb	227	56	Positive
1250571	Sr(YSe2)2	227	56	Positive
1250585	Y2SiSe4	227	56	Positive
1250593	Y2ZnSe4	227	56	Positive
1283409	Ag(Te2Ir)2	227	56	Positive
1283440	Al2ZnS4	227	56	Positive
1283462	Al(NiSe2)2	227	56	Positive
1283503	Cd(IrS2)2	227	56	Positive
1283510	Co2CuSe4	227	56	Positive
1283563	Cr(InSe2)2	227	56	Positive
1283620	Ga2HgO4	227	56	Positive
1283627	Ga2SiS4	227	56	Positive
1283652	Hg(IrS2)2	227	56	Positive
1283653	Hg(IrSe2)2	227	56	Positive
1283655	Hg(RhS2)2	227	56	Positive
1283709	Li(IrS2)2	227	56	Positive
1283710	Li(IrSe2)2	227	56	Positive
1283719	Li(RhS2)2	227	56	Positive
1283731	LiZr2O4	227	56	Positive
1283732	Li(ZrS2)2	227	56	Positive
1283733	Li(ZrSe2)2	227	56	Positive
1283742	Mg2CoSe4	227	56	Positive
1283746	Mg2CuS4	227	56	Positive
1283764	Mg2SiO4	227	56	Positive
1283773	Mg(AlS2)2	227	56	Positive
1283774	Mg(AlSe2)2	227	56	Positive
1283788	Mg(GaSe2)2	227	56	Positive
1283790	Mg(InSe2)2	227	56	Positive
1283801	Mg(ScSe2)2	227	56	Positive
1283850	MnAl2O4	227	56	Positive
1283851	Mn(AlS2)2	227	56	Positive
1283852	Mn(AlSe2)2	227	56	Positive
1283861	Mn(GaO2)2	227	56	Positive
1283865	Mn(InSe2)2	227	56	Positive
1283867	Mn(IrS2)2	227	56	Positive
1283900	Sc2AlO4	227	56	Positive
1283901	Sc2AlS4	227	56	Positive
1283903	Sc2CdO4	227	56	Positive
1283934	Sc2SnSe4	227	56	Positive
1284056	Y2CdSe4	227	56	Positive
1284057	Y2CoO4	227	56	Positive
1284073	Y2GeSe4	227	56	Positive
1284075	Y2HgS4	227	56	Positive
1284076	Y2HgSe4	227	56	Positive
1284078	Y2MgS4	227	56	Positive
1284080	Y2MnS4	227	56	Positive
1284081	Y2MnSe4	227	56	Positive
1284087	Y2SiSe4	227	56	Positive
1284089	Y2SnS4	227	56	Positive
1284090	Y2SnSe4	227	56	Positive
1284096	Y2ZnSe4	227	56	Positive
1284105	Zn(GaSe2)2	227	56	Positive
1284108	Zn(InSe2)2	227	56	Positive
1284110	Zn(IrS2)2	227	56	Positive
1284141	Zr2MnS4	227	56	Positive
6607	SiO2	227	24	Negative
7082	Cr2CdS4	227	56	Negative
10119	PbAu2	227	24	Negative
12843	Cr2AgTe4	227	56	Negative
17393	HfV2	227	24	Negative
17513	ScIr2	227	24	Negative
17516	SrIr2	227	24	Negative
17543	ZrIr2	227	24	Negative
18030	YPt2	227	24	Negative
18178	ZrV2	227	24	Negative
18348	YFe2	227	24	Negative
18767	CaIr2	227	24	Negative
19040	MnV2O4	227	56	Negative
22451	NaAs2	227	24	Negative
29408	NbCo2	227	24	Negative
29506	TaCo2	227	24	Negative
29518	TiCo2	227	24	Negative
431736	Rb2AsO4	227	56	Negative
432108	Ca(IrO2)2	227	56	Negative
432741	Mn2GaO4	227	56	Negative
432743	Na2GaO4	227	56	Negative
432888	Li2HfO4	227	56	Negative
433207	Li(MoO2)2	227	56	Negative
433223	Li(RhO2)2	227	56	Negative
433288	Mg(MoO2)2	227	56	Negative
433395	Tl2MoO4	227	56	Negative
434032	Tl2TcO4	227	56	Negative
643804	HfV2	227	24	Negative
647108	Cr2CuS4	227	56	Negative
1236375	SBr2	227	24	Negative
1236400	NiCl2	227	24	Negative
1236478	Be2Ge	227	24	Negative
1236506	KCl2	227	24	Negative
1236514	InCl2	227	24	Negative
1236650	TaB2	227	24	Negative
1236721	Zr2C	227	24	Negative
1236728	H2S	227	24	Negative
1236880	TiO2	227	24	Negative
1236899	CsI2	227	24	Negative
1236900	Cs2I	227	24	Negative
1236924	GaBr2	227	24	Negative
1236992	PbCl2	227	24	Negative
1237054	AgI2	227	24	Negative
1237229	TlF2	227	24	Negative
1237235	CuI2	227	24	Negative
1237252	GeO2	227	24	Negative
1237281	Li2P	227	24	Negative
1237297	Ba2Sb	227	24	Negative
1237382	Rb2Te	227	24	Negative
1237667	Br2O	227	24	Negative
1237730	AlN2	227	24	Negative
1237731	Al2N	227	24	Negative
1237858	BeI2	227	24	Negative
1237911	Zr2N	227	24	Negative
1237961	Li2Sb	227	24	Negative
1238013	InH2	227	24	Negative
1238103	MgI2	227	24	Negative
1238219	GeB2	227	24	Negative
1238245	TlCl2	227	24	Negative
1238370	BePt2	227	24	Negative
1238381	TlBr2	227	24	Negative
1238391	GeCl2	227	24	Negative
1238490	Li2Ni	227	24	Negative
1238528	Cs2H	227	24	Negative
1238541	Li2Pt	227	24	Negative
1238561	CsBr2	227	24	Negative
1238567	Be2Ru	227	24	Negative
1238620	Ti2Mo	227	24	Negative
1238644	IBr2	227	24	Negative
1238670	TeH2	227	24	Negative
1238839	BaS2	227	24	Negative
1238860	BaBr2	227	24	Negative
1238921	BaI2	227	24	Negative
1238933	SrI2	227	24	Negative
1238941	ZnH2	227	24	Negative
1238943	Fe2N	227	24	Negative
1239087	AgBr2	227	24	Negative
1239089	GaH2	227	24	Negative
1239142	KH2	227	24	Negative
1239147	BeH2	227	24	Negative
1239187	GeI2	227	24	Negative
1239197	CsF2	227	24	Negative
1239198	Cs2F	227	24	Negative
1239211	GaN2	227	24	Negative
1239212	Ga2N	227	24	Negative
1239232	SnCl2	227	24	Negative
1239241	Cs2Te	227	24	Negative
1239502	CaBr2	227	24	Negative
1239541	Be2Pb	227	24	Negative
1239572	BeBr2	227	24	Negative
1239596	MoN2	227	24	Negative
1239789	TeS2	227	24	Negative
1239790	Si2B	227	24	Negative
1239817	MnH2	227	24	Negative
1239834	V2N	227	24	Negative
1239835	VN2	227	24	Negative
1239924	MgB2	227	24	Negative
1239938	SeBr2	227	24	Negative
1240048	Be2Si	227	24	Negative
1240148	SnI2	227	24	Negative
1240449	NaH2	227	24	Negative
1240451	H2Se	227	24	Negative
1240477	KI2	227	24	Negative
1240487	Cs2S	227	24	Negative
1240496	Cs2Se	227	24	Negative
1240582	RbCl2	227	24	Negative
1240625	MgH2	227	24	Negative
1240781	Hg2H	227	24	Negative
1240782	HgH2	227	24	Negative
1240915	TiN2	227	24	Negative
1240972	Si2N	227	24	Negative
1241004	BeGa2	227	24	Negative
1241154	RuN2	227	24	Negative
1241256	SeN2	227	24	Negative
1241307	AlC2	227	24	Negative
1241308	Al2C	227	24	Negative
1241351	B2N	227	24	Negative
1241535	LiH2	227	24	Negative
1241599	Zr2Mo	227	24	Negative
1250497	Ba(ScSe2)2	227	56	Negative
1250506	Tl2TcSe4	227	56	Negative
1250511	Tc2AuSe4	227	56	Negative
1250512	Tc2AgSe4	227	56	Negative
1250526	Na(TcSe2)2	227	56	Negative
1250527	Tl(TcSe2)2	227	56	Negative
1250528	Tc2RhSe4	227	56	Negative
1250532	Tc2PdSe4	227	56	Negative
1250538	Cu(TcSe2)2	227	56	Negative
1250543	Li(TcSe2)2	227	56	Negative
1250547	Mn(TcSe2)2	227	56	Negative
1250561	Tc2PtSe4	227	56	Negative
1250563	Mg(TcSe2)2	227	56	Negative
1250583	Tc2AsSe4	227	56	Negative
1250589	Tc2TeSe4	227	56	Negative
1283501	Cd(GaSe2)2	227	56	Negative
1283698	Li(CrSe2)2	227	56	Negative
1283715	Li(MnSe2)2	227	56	Negative
1283718	Li(RhO2)2	227	56	Negative
1283795	Mg(MnSe2)2	227	56	Negative
1283809	Mn2AgTe4	227	56	Negative
1283812	Mn2AlSe4	227	56	Negative
1283815	Mn2CdSe4	227	56	Negative
1283817	Mn2CoS4	227	56	Negative
1283818	Mn2CoSe4	227	56	Negative
1283821	Mn2CuS4	227	56	Negative
1283822	Mn2CuSe4	227	56	Negative
1283825	Mn2FeSe4	227	56	Negative
1283828	Mn2GaSe4	227	56	Negative
1283834	Mn2HgSe4	227	56	Negative
1283835	Mn2NiSe4	227	56	Negative
1283841	Mn2SnSe4	227	56	Negative
1284049	V(RhO2)2	227	56	Negative
1284155	Zr2ZnS4	227	56	Negative
1897	ScAs	225	8	Positive
1898	ScSb	225	8	Positive
2577	MgO	225	8	Positive
2642	Li3Tl	225	16	Positive
3009	LiCu2Si	225	16	Positive
3682	NaBr	225	8	Positive
3683	KCl	225	8	Positive
3686	RbBr	225	8	Positive
4109	RbI	225	8	Positive
4138	ScS	225	8	Positive
4149	HfC	225	8	Positive
4151	ZrC	225	8	Positive
5166	LiCl	225	8	Positive
5177	ZrN	225	8	Positive
5178	NbC	225	8	Positive
5179	TaC	225	8	Positive
5181	CaO	225	8	Positive
5182	SrO	225	8	Positive
5426	LiBr	225	8	Positive
5427	LiI	225	8	Positive
5625	SrSe	225	8	Positive
5626	CaS	225	8	Positive
5627	MgS	225	8	Positive
5686	NaF	225	8	Positive
5695	BaTe	225	8	Positive
5783	BaS	225	8	Positive
6913	YN	225	8	Positive
6974	PbSe	225	8	Positive
7649	CaTe	225	8	Positive
7771	GeSb	225	8	Positive
8089	KH	225	8	Positive
8113	ScC	225	8	Positive
8173	BaSe	225	8	Positive
8353	NaI	225	8	Positive
8354	CsF	225	8	Positive
8485	InSb	225	8	Positive
10077	NiH	225	8	Positive
10081	RbH	225	8	Positive
10385	HfAlAu2	225	16	Positive
10466	TiAlFe2	225	16	Positive
10473	HfAlNi2	225	16	Positive
10505	Mn2AlV	225	16	Positive
10522	ScAlNi2	225	16	Positive
10768	Li3Au	225	16	Positive
10963	ScBi	225	8	Positive
10971	YBi	225	8	Positive
11166	InTe	225	8	Positive
11321	TlI	225	8	Positive
11506	CsI	225	8	Positive
11507	TlCl	225	8	Positive
11508	TlBr	225	8	Positive
11516	ScO	225	8	Positive
11589	PbS	225	8	Positive
12030	Cs2LiYCl6	225	40	Positive
12625	CsH	225	8	Positive
13677	HfB	225	8	Positive
14029	YP	225	8	Positive
14032	ZrP	225	8	Positive
17224	TiGaFe2	225	16	Positive
17278	ZrGaNi2	225	16	Positive
17405	Li3Hg	225	16	Positive
17589	Li2MgTl	225	16	Positive
17592	Li3Pb	225	16	Positive
17907	ScP	225	8	Positive
18108	YSe	225	8	Positive
18356	LiGa2Ir	225	16	Positive
18383	LiIn2Pd	225	16	Positive
18705	AlVFe2	225	16	Positive
21386	MgTe	225	8	Positive
22263	YC	225	8	Positive
22373	Mn2AlV	225	16	Positive
28054	InAs	225	8	Positive
30173	VGaFe2	225	16	Positive
30255	TiFe2Sn	225	16	Positive
298139	SrMg3	225	16	Positive
303383	CaMg3	225	16	Positive
307910	Ta3V	225	16	Positive
307923	Li3As	225	16	Positive
308190	Li3Hg	225	16	Positive
308281	Ta3Re	225	16	Positive
308304	ZrTc3	225	16	Positive
308312	MnMo3	225	16	Positive
308375	NaSr3	225	16	Positive
308435	V3Ir	225	16	Positive
308522	VMo3	225	16	Positive
308589	KSr3	225	16	Positive
308672	SrMg3	225	16	Positive
308709	ReMo3	225	16	Positive
308748	HfTa3	225	16	Positive
308802	Nb3Au	225	16	Positive
308836	Rb3Sr	225	16	Positive
308959	Ta3Pt	225	16	Positive
308969	Ta3Nb	225	16	Positive
308995	Na3Cd	225	16	Positive
309074	V3Os	225	16	Positive
309075	Cr3Re	225	16	Positive
309145	Li3Al	225	16	Positive
309158	Li3Rh	225	16	Positive
309205	Ba3Na	225	16	Positive
309220	RbBa3	225	16	Positive
309237	SrTl3	225	16	Positive
309312	Ta3Tc	225	16	Positive
309350	CsK3	225	16	Positive
309421	Nb3Al	225	16	Positive
309490	Nb3Fe	225	16	Positive
309501	TcMo3	225	16	Positive
309531	Li3Sn	225	16	Positive
309605	Cs3Rb	225	16	Positive
309610	TiMo3	225	16	Positive
309647	TiRe3	225	16	Positive
309867	Nb3Ir	225	16	Positive
309887	Li3Ga	225	16	Positive
309897	VCr3	225	16	Positive
310014	Li3P	225	16	Positive
310069	K3Li	225	16	Positive
310099	Nb3Co	225	16	Positive
310105	HfMo3	225	16	Positive
310213	K3Ca	225	16	Positive
310232	LiCa3	225	16	Positive
310240	Ti3Ru	225	16	Positive
310264	ZrNb3	225	16	Positive
310307	Ta3Rh	225	16	Positive
310367	Ta3Os	225	16	Positive
310385	Sr3Li	225	16	Positive
310426	BaSr3	225	16	Positive
310471	Mg3Sc	225	16	Positive
310505	YMg3	225	16	Positive
310531	MnNb3	225	16	Positive
310639	Na3Al	225	16	Positive
310669	Li3Pb	225	16	Positive
310680	V3Fe	225	16	Positive
310700	K3Sr	225	16	Positive
310741	Na3In	225	16	Positive
310773	Nb3Re	225	16	Positive
310824	Tl3Bi	225	16	Positive
310866	Ta3Ti	225	16	Positive
310941	Cs3Ba	225	16	Positive
310953	Zr3Ir	225	16	Positive
310958	KBa3	225	16	Positive
311047	Li3In	225	16	Positive
311058	MnCr3	225	16	Positive
311060	ZrMo3	225	16	Positive
311103	Ta3Cr	225	16	Positive
311138	Ta3Ir	225	16	Positive
311237	Tl3Sn	225	16	Positive
311310	Ca3Y	225	16	Positive
311313	Cs3Sr	225	16	Positive
311317	TaMo3	225	16	Positive
311384	CsBa3	225	16	Positive
311433	TiTc3	225	16	Positive
311445	ZrTa3	225	16	Positive
311475	Be3Cu	225	16	Positive
311529	Nb3In	225	16	Positive
311571	Ba3Sr	225	16	Positive
311578	RbSr3	225	16	Positive
311594	V3Re	225	16	Positive
311621	BaMg3	225	16	Positive
311626	Tl3Pb	225	16	Positive
311736	Na3Mg	225	16	Positive
311768	Nb3Pd	225	16	Positive
311983	Na3Ca	225	16	Positive
311999	NbMo3	225	16	Positive
312049	NaCa3	225	16	Positive
312103	Zr3Pb	225	16	Positive
312137	Li3Zn	225	16	Positive
312143	Li3Ge	225	16	Positive
312263	Li3Cu	225	16	Positive
312293	Li3Cd	225	16	Positive
312437	AlV3	225	16	Positive
312488	Nb3Ru	225	16	Positive
312492	Sr3Ca	225	16	Positive
312590	Cr3Tc	225	16	Positive
312595	Nb3Os	225	16	Positive
312647	Na3Pb	225	16	Positive
312686	LiMg3	225	16	Positive
312724	Na3Tl	225	16	Positive
312739	K3Rb	225	16	Positive
312763	ScCd3	225	16	Positive
312776	Li3Au	225	16	Positive
312787	ScTc3	225	16	Positive
312878	NaTl3	225	16	Positive
312920	AlMo3	225	16	Positive
312955	Sr3Mg	225	16	Positive
313012	Rb3Ba	225	16	Positive
313020	Nb3Tc	225	16	Positive
313047	TiNb3	225	16	Positive
313070	Ta3Ru	225	16	Positive
313151	Ta3Mn	225	16	Positive
313227	Rb3Na	225	16	Positive
313311	Cr3Mo	225	16	Positive
313331	CrMo3	225	16	Positive
313362	Ca3Mg	225	16	Positive
313383	K3Na	225	16	Positive
313432	Li3Ag	225	16	Positive
313494	Zr3Pt	225	16	Positive
313506	Nb3Pt	225	16	Positive
313517	Li3Tl	225	16	Positive
313528	NaLi3	225	16	Positive
313529	ScMo3	225	16	Positive
313580	Li3Mg	225	16	Positive
313585	LiZn3	225	16	Positive
313671	HfTc3	225	16	Positive
313675	Na3Li	225	16	Positive
313692	Ti3Ir	225	16	Positive
313740	Be3Ni	225	16	Positive
313799	BaCa3	225	16	Positive
313828	Cs3Na	225	16	Positive
313883	Zr3Os	225	16	Positive
313925	CaMg3	225	16	Positive
313928	Ba3Ca	225	16	Positive
313939	K3Ba	225	16	Positive
313993	Ba3Li	225	16	Positive
314137	KNa3	225	16	Positive
314189	KRb3	225	16	Positive
314195	TaNb3	225	16	Positive
314261	Ta3Au	225	16	Positive
314289	LiBe3	225	16	Positive
314320	V3Ru	225	16	Positive
314435	ScZn3	225	16	Positive
314444	SrCa3	225	16	Positive
314468	Ta3Pd	225	16	Positive
314479	CsRb3	225	16	Positive
314487	Li3Si	225	16	Positive
314518	Nb3Rh	225	16	Positive
314555	Cs3K	225	16	Positive
314639	NaMg3	225	16	Positive
314650	Na3Sn	225	16	Positive
314853	HfNb3	225	16	Positive
314914	Ti3Os	225	16	Positive
325782	HRu	225	8	Positive
325865	LiH	225	8	Positive
326081	ScN	225	8	Positive
326638	AlSe	225	8	Positive
326671	TiAs	225	8	Positive
326837	YSb	225	8	Positive
326993	SrTe	225	8	Positive
327509	HfN	225	8	Positive
327854	LiF	225	8	Positive
328122	HRh	225	8	Positive
328526	ZrB	225	8	Positive
328549	CrC	225	8	Positive
328926	YAs	225	8	Positive
360756	Sc2CoNi	225	16	Positive
361027	Sc2CdCo	225	16	Positive
361045	Sc2CdPt	225	16	Positive
361245	Sc2SnMo	225	16	Positive
361290	Sc2RuAu	225	16	Positive
361376	Sc2TlAu	225	16	Positive
361382	Sc2HgGe	225	16	Positive
361398	MgSc2Re	225	16	Positive
361553	Sc2CdIr	225	16	Positive
361611	Sc2HgRh	225	16	Positive
361649	Sc2GaCo	225	16	Positive
361708	Sc2AgPd	225	16	Positive
361765	Sc2ZnPd	225	16	Positive
361795	LiSc2Ge	225	16	Positive
361888	Sc2BeRh	225	16	Positive
361988	Sc2TlZn	225	16	Positive
362149	Sc2SnRu	225	16	Positive
362354	Sc2AlRu	225	16	Positive
362363	Sc2CoIr	225	16	Positive
362433	Sc2CuIr	225	16	Positive
362763	Sc2PbAu	225	16	Positive
362845	LiSc2Co	225	16	Positive
362903	Sc2ZnTc	225	16	Positive
362908	Sc2OsAu	225	16	Positive
363031	Sc2AlIn	225	16	Positive
363080	Sc2CoPt	225	16	Positive
363110	Sc2CuPt	225	16	Positive
363742	CaHfPt2	225	16	Positive
365789	RbNa2Sn	225	16	Positive
368364	HfSnOs2	225	16	Positive
368386	MgSiOs2	225	16	Positive
368791	ScVOs2	225	16	Positive
368949	AlGaOs2	225	16	Positive
368973	MgNbOs2	225	16	Positive
369054	HfSiOs2	225	16	Positive
369203	ZrTiOs2	225	16	Positive
369204	SiGeOs2	225	16	Positive
369322	HfAlOs2	225	16	Positive
369483	CrSiOs2	225	16	Positive
370325	ScMoOs2	225	16	Positive
370389	TiVOs2	225	16	Positive
370860	BaTl2In	225	16	Positive
370866	SrTl2Pb	225	16	Positive
370871	Tl2HgBi	225	16	Positive
371126	SrMgTl2	225	16	Positive
371130	BaScTl2	225	16	Positive
371132	CaTl2Cd	225	16	Positive
371517	CaTl2Ag	225	16	Positive
371609	BaMgTl2	225	16	Positive
371877	RbTl2Pb	225	16	Positive
371966	LiYTl2	225	16	Positive
372026	KTl2Sn	225	16	Positive
372049	BaTl2Sn	225	16	Positive
372237	CaTl2In	225	16	Positive
372778	LiTl2In	225	16	Positive
373009	SrScTl2	225	16	Positive
373036	BaYTl2	225	16	Positive
373139	RbTl2Bi	225	16	Positive
373148	SrTl2In	225	16	Positive
373239	NaTl2Cd	225	16	Positive
373301	NaMgTl2	225	16	Positive
373306	NaTl2Sn	225	16	Positive
375994	ReSi2Rh	225	16	Positive
376204	CrSi2Rh	225	16	Positive
376641	Si2MoOs	225	16	Positive
377714	ReSi2Ru	225	16	Positive
377747	FeSi2Os	225	16	Positive
379094	TcMoAs2	225	16	Positive
379131	TiMoAs2	225	16	Positive
387763	VCr2Re	225	16	Positive
388180	TaCr2Re	225	16	Positive
391512	MnV2Re	225	16	Positive
391546	V2MoRu	225	16	Positive
391586	V2ReMo	225	16	Positive
391709	V2CrRe	225	16	Positive
391765	MnV2Mo	225	16	Positive
391808	TaV2Rh	225	16	Positive
391840	MnV2Fe	225	16	Positive
392013	V2CrRu	225	16	Positive
392382	MnV2Os	225	16	Positive
392408	V2CrFe	225	16	Positive
392435	MnV2Cr	225	16	Positive
392626	MnV2Ru	225	16	Positive
392641	TaV2Ru	225	16	Positive
392672	AlV2Tc	225	16	Positive
392746	V2ReOs	225	16	Positive
392832	V2FeRe	225	16	Positive
392931	NbV2Ru	225	16	Positive
392971	NbV2Os	225	16	Positive
393047	V2ReRu	225	16	Positive
393109	V2CrOs	225	16	Positive
393274	AlV2Mo	225	16	Positive
393292	TaV2Re	225	16	Positive
393437	V2FeMo	225	16	Positive
393548	TaV2Os	225	16	Positive
393864	BaMg2In	225	16	Positive
394277	Mg2PdRh	225	16	Positive
394520	Mg2RuAu	225	16	Positive
394603	Mg2TlAu	225	16	Positive
394649	Mg2IrPt	225	16	Positive
394829	NaMg2Ir	225	16	Positive
394891	Mg2AgIr	225	16	Positive
394913	Mg2IrPd	225	16	Positive
395608	Mg2NiPd	225	16	Positive
395697	Mg2NiIr	225	16	Positive
396043	BaCaMg2	225	16	Positive
396241	Mg2TlIn	225	16	Positive
404578	ScZnCu2	225	16	Positive
404830	LiGaCu2	225	16	Positive
404998	MgScCu2	225	16	Positive
405467	ScInCu2	225	16	Positive
405574	YAlCu2	225	16	Positive
406476	LiCu2Si	225	16	Positive
406511	LiAlCu2	225	16	Positive
409227	Y2MgPd	225	16	Positive
409326	Y2TlGa	225	16	Positive
409510	Y2TlAg	225	16	Positive
409558	Y2CoAg	225	16	Positive
409635	LiY2Rh	225	16	Positive
409737	Y2HgPt	225	16	Positive
409844	LiY2Cd	225	16	Positive
409859	Y2BeCo	225	16	Positive
409873	Y2GeAu	225	16	Positive
409950	Y2TlAu	225	16	Positive
410006	Y2AlCu	225	16	Positive
410031	Y2CdPd	225	16	Positive
410050	Y2PtAu	225	16	Positive
410257	Y2AlCo	225	16	Positive
410452	Y2AlTl	225	16	Positive
411030	Y2NiIr	225	16	Positive
411180	Y2OsPd	225	16	Positive
411208	Y2BeIn	225	16	Positive
411233	Y2MgPt	225	16	Positive
411517	Y2InIr	225	16	Positive
411621	Y2PdRu	225	16	Positive
411718	Y2MgCd	225	16	Positive
411954	YHfCo2	225	16	Positive
412414	TiBeCo2	225	16	Positive
412436	BeVCo2	225	16	Positive
412609	LiTaCo2	225	16	Positive
412617	BeAlCo2	225	16	Positive
412956	LiTiCo2	225	16	Positive
413196	HfZnCo2	225	16	Positive
413529	ScAlCo2	225	16	Positive
413805	MgAlCo2	225	16	Positive
413908	ZrAlCo2	225	16	Positive
414194	HfMgCo2	225	16	Positive
414336	Hf2ReRh	225	16	Positive
414581	Hf2AgRh	225	16	Positive
414612	Hf2BeOs	225	16	Positive
414847	Hf2MnFe	225	16	Positive
415040	Hf2BeRu	225	16	Positive
415079	Hf2MgRe	225	16	Positive
415164	Hf2NiOs	225	16	Positive
415314	Hf2BeRe	225	16	Positive
415335	Hf2NbRe	225	16	Positive
415394	Hf2MnOs	225	16	Positive
415507	Hf2IrRu	225	16	Positive
415641	Hf2MnRu	225	16	Positive
415788	Hf2FeNi	225	16	Positive
415846	Hf2FeRe	225	16	Positive
415888	Hf2VRe	225	16	Positive
416004	Hf2CdOs	225	16	Positive
416059	Hf2ReRu	225	16	Positive
416090	Hf2NiRu	225	16	Positive
416120	Hf2CrOs	225	16	Positive
416184	Hf2ZnCu	225	16	Positive
416202	Hf2BeFe	225	16	Positive
416307	Hf2TaRe	225	16	Positive
416338	Hf2ZnCd	225	16	Positive
417037	Ba2AsAu	225	16	Positive
417120	Ba2AlHg	225	16	Positive
417134	Ba2AgRh	225	16	Positive
417147	Ba2AgPt	225	16	Positive
417178	Ba2InAu	225	16	Positive
417203	Ba2AlAu	225	16	Positive
417209	KBa2Pb	225	16	Positive
417278	Ba2TlPb	225	16	Positive
417279	Ba2CdPt	225	16	Positive
417335	Ba2LiPt	225	16	Positive
417397	Ba2HgPt	225	16	Positive
417436	Ba2LiAu	225	16	Positive
417532	Ba2GeAu	225	16	Positive
417566	Ba2TlPt	225	16	Positive
417594	Ba2GaAu	225	16	Positive
417608	Ba2TlAu	225	16	Positive
417661	Ba2AgBi	225	16	Positive
417678	Ba2MgTl	225	16	Positive
417689	Ba2CdPd	225	16	Positive
417784	Ba2CdIr	225	16	Positive
417843	Ba2HgRh	225	16	Positive
417882	Ba2AgAs	225	16	Positive
417899	Ba2AgIr	225	16	Positive
417922	Ba2IrPd	225	16	Positive
417940	Ba2AgPd	225	16	Positive
417996	Ba2ZnPd	225	16	Positive
418076	Ba2InHg	225	16	Positive
418113	Ba2GaHg	225	16	Positive
418145	Ba2ZnAu	225	16	Positive
418158	Ba2CdPb	225	16	Positive
418173	Ba2SbAu	225	16	Positive
418214	Ba2TlZn	225	16	Positive
418228	Ba2GaPt	225	16	Positive
418232	Ba2TlCd	225	16	Positive
418235	Ba2CuBi	225	16	Positive
418263	Ba2SnAu	225	16	Positive
418323	Ba2LiHg	225	16	Positive
418408	Ba2CdBi	225	16	Positive
418421	Ba2AgPb	225	16	Positive
418486	Ba2AgAu	225	16	Positive
418537	Ba2MgHg	225	16	Positive
418551	Ba2NaPb	225	16	Positive
418684	Ba2ZnBi	225	16	Positive
418702	Ba2ZnPt	225	16	Positive
418724	Ba2SiAu	225	16	Positive
418737	Ba2HgSb	225	16	Positive
418778	Ba2SnHg	225	16	Positive
418884	Ba2LiTl	225	16	Positive
418912	Ba2NaHg	225	16	Positive
418921	Ba2CdHg	225	16	Positive
418928	Ba2HgPd	225	16	Positive
418973	Ba2HgPb	225	16	Positive
418996	Ba2PbAu	225	16	Positive
419013	Ba2PdAu	225	16	Positive
419070	Ba2TlHg	225	16	Positive
419136	Ba2RhAu	225	16	Positive
419162	Ba2CdAu	225	16	Positive
419171	Ba2AgGe	225	16	Positive
419178	Ba2HgAu	225	16	Positive
419210	Ba2PdPt	225	16	Positive
419280	Ba2LiBi	225	16	Positive
419295	Ba2MgAu	225	16	Positive
419344	Ba2CuPt	225	16	Positive
419397	Ba2SiHg	225	16	Positive
419853	LiGe2Rh	225	16	Positive
442534	Ca2MgGe	225	16	Positive
442802	Ca2InAu	225	16	Positive
443191	Ca2TlPt	225	16	Positive
443235	Ca2TlAu	225	16	Positive
443288	Ca2AgBi	225	16	Positive
443521	Ca2AgIr	225	16	Positive
443561	Ca2AgPd	225	16	Positive
443800	Ca2SbAu	225	16	Positive
443849	LiCa2Ag	225	16	Positive
443861	Ca2TlCd	225	16	Positive
443877	Ca2ZnSn	225	16	Positive
443893	Ca2SnAu	225	16	Positive
444191	Ca2AsPt	225	16	Positive
444563	Ca2AlAg	225	16	Positive
444753	LiCa2Pd	225	16	Positive
445119	Li2InPd	225	16	Positive
445236	Li2YGe	225	16	Positive
445318	Li2AgRh	225	16	Positive
445332	Li2AgPt	225	16	Positive
445486	Li2ScGa	225	16	Positive
445624	SrLi2Bi	225	16	Positive
445670	Li2CaTl	225	16	Positive
446242	BaLi2Sn	225	16	Positive
446402	Li2TlZn	225	16	Positive
446726	BaLi2Pb	225	16	Positive
446753	Li2YSi	225	16	Positive
446816	KLi2Sb	225	16	Positive
446879	Li2InRh	225	16	Positive
447016	Li2CaMg	225	16	Positive
447203	Li2ZrAl	225	16	Positive
447245	Li2TlRh	225	16	Positive
449310	TiMo2Os	225	16	Positive
450201	MgVRh2	225	16	Positive
450414	AlHgRh2	225	16	Positive
450435	CaCdRh2	225	16	Positive
450469	InRh2Au	225	16	Positive
450656	AlZnRh2	225	16	Positive
450709	CaHfRh2	225	16	Positive
450745	InGaRh2	225	16	Positive
450844	BeVRh2	225	16	Positive
450896	LiGaRh2	225	16	Positive
450974	MgZrRh2	225	16	Positive
451024	BeAlRh2	225	16	Positive
451141	LiRh2Pb	225	16	Positive
451367	InHgRh2	225	16	Positive
451444	AgSnRh2	225	16	Positive
451647	AlCdRh2	225	16	Positive
451833	GaCuRh2	225	16	Positive
451887	ScCdRh2	225	16	Positive
451899	ScBeRh2	225	16	Positive
452095	LiVRh2	225	16	Positive
452211	MgAlRh2	225	16	Positive
452318	ZrCuRh2	225	16	Positive
452469	SiNiRh2	225	16	Positive
452520	MgGaRh2	225	16	Positive
452579	LiAlRh2	225	16	Positive
453568	NaIn2Pd	225	16	Positive
453623	SrYIn2	225	16	Positive
454472	NaIn2Pt	225	16	Positive
458366	LiAsIr2	225	16	Positive
458387	CaHfIr2	225	16	Positive
459199	ScInIr2	225	16	Positive
459215	ZrCdIr2	225	16	Positive
459537	ZnSiIr2	225	16	Positive
459690	LiScIr2	225	16	Positive
460139	LiCrIr2	225	16	Positive
460142	LiBeIr2	225	16	Positive
460186	MgGaIr2	225	16	Positive
460247	LiAlIr2	225	16	Positive
463254	GaSiPd2	225	16	Positive
463283	InPd2Pb	225	16	Positive
463393	YZrPd2	225	16	Positive
463456	ZnNiPd2	225	16	Positive
463629	ScTiPd2	225	16	Positive
463647	CuAsPd2	225	16	Positive
463937	BiTePd2	225	16	Positive
467765	ZrScPd2	225	16	Positive
468175	MgBiPd2	225	16	Positive
468177	CdSbPd2	225	16	Positive
468293	LiScPd2	225	16	Positive
468406	MgSnPd2	225	16	Positive
468794	SrCaPd2	225	16	Positive
468806	LiNiPd2	225	16	Positive
468936	CaZnPd2	225	16	Positive
471546	TaMn2V	225	16	Positive
471738	TiMn2Cr	225	16	Positive
471949	TiMn2Si	225	16	Positive
472077	Mn2VSi	225	16	Positive
472122	Mn2AlCr	225	16	Positive
472144	TiMn2Mo	225	16	Positive
472333	Mn2VGe	225	16	Positive
472454	HfMn2Nb	225	16	Positive
472994	Mn2VGa	225	16	Positive
473127	HfMn2V	225	16	Positive
473192	Mn2NbSi	225	16	Positive
473374	TiMn2Nb	225	16	Positive
473462	Mn2NbV	225	16	Positive
473476	Mn2AlV	225	16	Positive
473509	Mn2AlMo	225	16	Positive
473589	Mn2AlRe	225	16	Positive
473603	Mn2NbGa	225	16	Positive
473624	TiMn2V	225	16	Positive
473826	TaMn2Nb	225	16	Positive
474033	Mn2NbAl	225	16	Positive
474046	HfTaMn2	225	16	Positive
481775	ScNbZn2	225	16	Positive
482034	SrMgZn2	225	16	Positive
482140	Zn2CoPd	225	16	Positive
482231	YZn2In	225	16	Positive
482471	Zn2PtRh	225	16	Positive
482521	BaMgZn2	225	16	Positive
482907	YZn2Cd	225	16	Positive
483073	BaSrZn2	225	16	Positive
483110	ZrScZn2	225	16	Positive
483601	Zn2NiIr	225	16	Positive
483728	CaMgZn2	225	16	Positive
483945	BaCaZn2	225	16	Positive
484005	HfScZn2	225	16	Positive
484143	LiZn2Ni	225	16	Positive
484185	Zn2PdRu	225	16	Positive
484209	Zn2CoPt	225	16	Positive
484227	LiZn2Ir	225	16	Positive
486161	TiNbSb2	225	16	Positive
486882	ScNb2Os	225	16	Positive
487119	Nb2VRu	225	16	Positive
487334	MnNb2Mo	225	16	Positive
487378	TaNb2Rh	225	16	Positive
487588	Nb2CrRu	225	16	Positive
488109	Nb2ReNi	225	16	Positive
488190	TaNb2Al	225	16	Positive
488221	TaNb2Ru	225	16	Positive
488417	Nb2VOs	225	16	Positive
488687	Nb2CrOs	225	16	Positive
488867	TaNb2Re	225	16	Positive
492142	LiSn2Os	225	16	Positive
492848	NaSn2Pd	225	16	Positive
498705	CaRhPb2	225	16	Positive
499143	LiMgPb2	225	16	Positive
499702	Be2AgRu	225	16	Positive
499711	Be2CoRh	225	16	Positive
499752	Be2ZnOs	225	16	Positive
499780	Be2CoNi	225	16	Positive
499924	Be2AgRh	225	16	Positive
499929	Be2FePd	225	16	Positive
499974	Be2ZnCo	225	16	Positive
500184	Be2ZnNi	225	16	Positive
500500	Be2NiOs	225	16	Positive
500558	Be2CuRu	225	16	Positive
500637	HfZrBe2	225	16	Positive
500646	Be2NiRh	225	16	Positive
500683	Be2AgIr	225	16	Positive
500702	Be2FeAu	225	16	Positive
500829	Be2CoCu	225	16	Positive
500896	Be2RePt	225	16	Positive
501006	MgBe2Ir	225	16	Positive
501123	Be2FeNi	225	16	Positive
501250	Be2FeRh	225	16	Positive
501275	Be2AgAu	225	16	Positive
501403	Be2NiPd	225	16	Positive
501490	Be2NiIr	225	16	Positive
501494	Be2RuRh	225	16	Positive
501598	Be2CuNi	225	16	Positive
501640	Be2OsPd	225	16	Positive
501779	Be2OsRh	225	16	Positive
501846	HfTiBe2	225	16	Positive
501932	Be2OsAu	225	16	Positive
501968	Be2CuRh	225	16	Positive
502224	ScNbRu2	225	16	Positive
502522	ZrSnRu2	225	16	Positive
502647	ScGaRu2	225	16	Positive
502708	ScVRu2	225	16	Positive
502886	MgNbRu2	225	16	Positive
502937	CrGaRu2	225	16	Positive
503031	MgZrRu2	225	16	Positive
503521	ZrBeRu2	225	16	Positive
503549	ZrScRu2	225	16	Positive
503581	HfInRu2	225	16	Positive
504042	CuSiRu2	225	16	Positive
504046	TiNbRu2	225	16	Positive
504050	NbInRu2	225	16	Positive
504149	VSnRu2	225	16	Positive
504212	AlGeRu2	225	16	Positive
504277	NbGaRu2	225	16	Positive
504298	TiVRu2	225	16	Positive
504402	HfTiRu2	225	16	Positive
504591	ScGeRu2	225	16	Positive
505579	MgZrAg2	225	16	Positive
505909	YAg2Sn	225	16	Positive
506150	CaInAg2	225	16	Positive
506255	LiZnAg2	225	16	Positive
507135	SrCaAg2	225	16	Positive
507207	HfMgAg2	225	16	Positive
510146	Al2AgRh	225	16	Positive
510455	MnAl2Rh	225	16	Positive
510501	Al2FeCo	225	16	Positive
511127	Al2RePt	225	16	Positive
511223	Al2ReIr	225	16	Positive
511518	Al2NiPt	225	16	Positive
511823	Al2CuNi	225	16	Positive
512023	ScAl2Pd	225	16	Positive
512158	Al2CoRu	225	16	Positive
512345	Al2CuPd	225	16	Positive
512602	NaAlHg2	225	16	Positive
512705	SrMgHg2	225	16	Positive
512880	BaHg2Bi	225	16	Positive
512888	BaNaHg2	225	16	Positive
512926	ScZnHg2	225	16	Positive
513323	NaInHg2	225	16	Positive
513614	KSnHg2	225	16	Positive
513638	BaSnHg2	225	16	Positive
513647	LiTiHg2	225	16	Positive
513765	NaSrHg2	225	16	Positive
513772	CaGaHg2	225	16	Positive
513809	TlHg2Bi	225	16	Positive
513907	NaCaHg2	225	16	Positive
514116	BaHg2Pb	225	16	Positive
514150	NaTlHg2	225	16	Positive
514365	LiInHg2	225	16	Positive
514619	BaYHg2	225	16	Positive
514622	BaCaHg2	225	16	Positive
514732	SrInHg2	225	16	Positive
514763	MgTiHg2	225	16	Positive
514821	NaCdHg2	225	16	Positive
514973	LiZrHg2	225	16	Positive
515158	NaAlAu2	225	16	Positive
515267	CaCdAu2	225	16	Positive
515270	BeZnAu2	225	16	Positive
515454	YInAu2	225	16	Positive
515477	ScZnAu2	225	16	Positive
515653	TiBeAu2	225	16	Positive
515661	MgBeAu2	225	16	Positive
515727	LiGaAu2	225	16	Positive
515850	BeAlAu2	225	16	Positive
515896	SrYAu2	225	16	Positive
515965	YSbAu2	225	16	Positive
515993	BiPbAu2	225	16	Positive
516129	YSnAu2	225	16	Positive
516293	BaSrAu2	225	16	Positive
516373	CaInAu2	225	16	Positive
516451	NaCaAu2	225	16	Positive
516496	NaYAu2	225	16	Positive
516513	NaZrAu2	225	16	Positive
516956	CaMgAu2	225	16	Positive
517038	LiMgAu2	225	16	Positive
517205	NaHfAu2	225	16	Positive
520158	Ga2CoRh	225	16	Positive
520380	CaCdGa2	225	16	Positive
520534	LiGa2Rh	225	16	Positive
520979	NaInGa2	225	16	Positive
521027	LiGa2Ru	225	16	Positive
521177	Ga2TcRh	225	16	Positive
521826	Ga2CoIr	225	16	Positive
521896	CaGa2Ir	225	16	Positive
522227	Ga2OsRh	225	16	Positive
522473	SrCaGa2	225	16	Positive
522485	LiGa2Ni	225	16	Positive
522556	NaGa2Sn	225	16	Positive
525231	ScNbFe2	225	16	Positive
525286	HfFe2Sn	225	16	Positive
525445	BeFe2Si	225	16	Positive
525537	GaFe2Si	225	16	Positive
525626	TiFe2Si	225	16	Positive
525672	TiGaFe2	225	16	Positive
525679	BeCrFe2	225	16	Positive
525903	BeVFe2	225	16	Positive
526124	Fe2SiGe	225	16	Positive
526207	HfZrFe2	225	16	Positive
526552	TiFe2Ge	225	16	Positive
526680	VGaFe2	225	16	Positive
526685	AlFe2Si	225	16	Positive
526722	TiAlFe2	225	16	Positive
527157	AlVFe2	225	16	Positive
527284	NbGaFe2	225	16	Positive
527590	TaBeFe2	225	16	Positive
527713	NbAlFe2	225	16	Positive
527727	HfTaFe2	225	16	Positive
528646	BeAlNi2	225	16	Positive
530089	LiBeNi2	225	16	Positive
530195	LiAlNi2	225	16	Positive
530475	ZrTa2Tc	225	16	Positive
530536	Ta2MnRe	225	16	Positive
530571	Ta2VRu	225	16	Positive
530735	Ta2CrRe	225	16	Positive
530950	Ta2TiRe	225	16	Positive
531040	Ta2CrRu	225	16	Positive
531383	Ta2VFe	225	16	Positive
531439	Ta2CrFe	225	16	Positive
531465	Ta2MnCr	225	16	Positive
531555	Ta2TiIr	225	16	Positive
531732	Ta2MnV	225	16	Positive
531906	Ta2VRe	225	16	Positive
532035	Ta2TiOs	225	16	Positive
532135	Ta2CrOs	225	16	Positive
532281	Ta2CrMo	225	16	Positive
532469	Ta2FeMo	225	16	Positive
532508	ZrTa2Ir	225	16	Positive
532592	Ta2VIr	225	16	Positive
532673	ZrTa2Os	225	16	Positive
540567	ScNbRe2	225	16	Positive
541258	VCrRe2	225	16	Positive
541616	TaTiRe2	225	16	Positive
541770	TaRe2Mo	225	16	Positive
541861	TaAlRe2	225	16	Positive
542099	HfRe2Mo	225	16	Positive
542264	ScTaRe2	225	16	Positive
542395	TiNbRe2	225	16	Positive
542494	AlVRe2	225	16	Positive
542527	AlRe2Mo	225	16	Positive
542578	ScRe2Mo	225	16	Positive
542640	TiVRe2	225	16	Positive
542745	HfTiRe2	225	16	Positive
543050	NbAlRe2	225	16	Positive
543138	Sr2ZnPb	225	16	Positive
543180	Sr2InPd	225	16	Positive
543225	Sr2MgPb	225	16	Positive
543276	NaSr2Al	225	16	Positive
543362	Sr2AlHg	225	16	Positive
543421	Sr2InAu	225	16	Positive
543444	Sr2AlAu	225	16	Positive
543469	NaSr2Ag	225	16	Positive
543583	Sr2LiPt	225	16	Positive
543604	Sr2MgAg	225	16	Positive
543682	Sr2LiAu	225	16	Positive
543769	Sr2TlPd	225	16	Positive
543779	Sr2GeAu	225	16	Positive
543843	Sr2GaAu	225	16	Positive
543881	Sr2AgHg	225	16	Positive
543927	Sr2MgTl	225	16	Positive
543938	Sr2CdPd	225	16	Positive
543971	NaSr2Pd	225	16	Positive
544091	Sr2HgRh	225	16	Positive
544147	Sr2AgIr	225	16	Positive
544324	Sr2InHg	225	16	Positive
544335	NaSr2Sb	225	16	Positive
544396	Sr2ZnAu	225	16	Positive
544401	Sr2AgSn	225	16	Positive
544424	Sr2SbAu	225	16	Positive
544481	Sr2GaPt	225	16	Positive
544512	Sr2AsPd	225	16	Positive
544518	Sr2SnAu	225	16	Positive
544577	Sr2LiHg	225	16	Positive
544597	Sr2CuAu	225	16	Positive
544735	Sr2AgAu	225	16	Positive
544786	Sr2MgHg	225	16	Positive
544800	NaSr2Pb	225	16	Positive
544820	NaSr2Tl	225	16	Positive
544870	NaSr2Pt	225	16	Positive
545019	Sr2AgSb	225	16	Positive
545025	Sr2SnHg	225	16	Positive
545159	NaSr2Hg	225	16	Positive
545160	Sr2MgAl	225	16	Positive
545168	Sr2CdHg	225	16	Positive
545175	Sr2HgPd	225	16	Positive
545226	Sr2GaPd	225	16	Positive
545377	Sr2LiPd	225	16	Positive
545408	Sr2CdAu	225	16	Positive
545521	NaSr2Au	225	16	Positive
545541	Sr2MgAu	225	16	Positive
545578	Sr2CuPd	225	16	Positive
545589	Sr2CuPt	225	16	Positive
546102	LiBi2Rh	225	16	Positive
546143	LiBi2Pt	225	16	Positive
546524	NaBi2Pd	225	16	Positive
546637	NaBi2Ir	225	16	Positive
547425	NaBi2Pt	225	16	Positive
547948	NaBi2Rh	225	16	Positive
550976	TiCrTc2	225	16	Positive
553609	SrMgCd2	225	16	Positive
553813	LiCd2Pt	225	16	Positive
553922	KCd2Bi	225	16	Positive
554448	LiYCd2	225	16	Positive
554634	NaScCd2	225	16	Positive
555487	SrScCd2	225	16	Positive
555946	Zr2CoRh	225	16	Positive
556249	Zr2CoAg	225	16	Positive
556268	Zr2CoPd	225	16	Positive
556341	Zr2MnPd	225	16	Positive
556429	Zr2MnFe	225	16	Positive
556578	MgZr2Os	225	16	Positive
556586	Zr2MnAl	225	16	Positive
556606	Zr2CrRu	225	16	Positive
556734	Zr2SbTe	225	16	Positive
557218	Zr2MnRu	225	16	Positive
557363	Zr2FeNi	225	16	Positive
557421	Zr2FeRe	225	16	Positive
557475	Zr2TaIn	225	16	Positive
557536	Zr2TaIr	225	16	Positive
557577	Zr2GaMo	225	16	Positive
557638	Zr2ReRu	225	16	Positive
557702	HfZr2Pt	225	16	Positive
557739	Zr2NbIn	225	16	Positive
557743	Zr2NbIr	225	16	Positive
557959	Zr2NbGa	225	16	Positive
558313	LiZr2Al	225	16	Positive
561027	Ti2ReRh	225	16	Positive
561069	HfTi2Sn	225	16	Positive
561150	Ti2MnGa	225	16	Positive
561224	Ti2CrCo	225	16	Positive
561239	Ti2CrRh	225	16	Positive
561272	Ti2FeRu	225	16	Positive
561391	Ti2CoRe	225	16	Positive
561534	Ti2MnFe	225	16	Positive
561577	Ti2MnRh	225	16	Positive
561609	Ti2BeMo	225	16	Positive
561848	Ti2NiOs	225	16	Positive
561903	Ti2CuRu	225	16	Positive
562007	Ti2CoOs	225	16	Positive
562076	Ti2MnOs	225	16	Positive
562103	Ti2CrFe	225	16	Positive
562151	Ti2VSb	225	16	Positive
562321	Ti2MnRu	225	16	Positive
562336	Ti2ReIr	225	16	Positive
562366	Ti2MnIr	225	16	Positive
562369	Ti2NbPd	225	16	Positive
562414	TaTi2As	225	16	Positive
562439	Ti2ReOs	225	16	Positive
562587	Ti2CrIr	225	16	Positive
562614	Ti2MnPt	225	16	Positive
562666	TaTi2Sn	225	16	Positive
562741	Ti2ReRu	225	16	Positive
562776	Ti2FeOs	225	16	Positive
562850	Ti2CrNi	225	16	Positive
562862	Ti2CrPd	225	16	Positive
563099	Ti2NbSb	225	16	Positive
563403	Ti2MnCo	225	16	Positive
563409	Ti2OsRu	225	16	Positive
563525	Ti2CuRe	225	16	Positive
642654	NaH	225	8	Positive
646161	LiSiNi2	225	16	Positive
646185	Li3Sb	225	16	Positive
646222	ScSe	225	8	Positive
646223	YS	225	8	Positive
647012	Li2CdGe	225	16	Positive
647290	RbF	225	8	Positive
647326	MgSe	225	8	Positive
647461	ZrInNi2	225	16	Positive
647475	TiInNi2	225	16	Positive
667869	InP	225	8	Positive
675175	Li3Sb	225	16	Positive
715978	LiZn3	225	16	Positive
716014	ScZn3	225	16	Positive
730086	LiZn2Ni	225	16	Positive
730602	LiScZn2	225	16	Positive
732594	LiZn3	225	16	Positive
732630	ScZn3	225	16	Positive
748330	ScZn3	225	16	Positive
749040	LiZn3	225	16	Positive
918215	Nb2CrRh	225	16	Positive
918435	MnNb2Mo	225	16	Positive
1103688	NbB	225	8	Positive
1103698	YO	225	8	Positive
1103799	CsAu	225	8	Positive
1103872	TiC	225	8	Positive
1103913	VC	225	8	Positive
1103997	RbCl	225	8	Positive
1104004	ZrAs	225	8	Positive
1104016	ZrSn	225	8	Positive
1104038	SrPt	225	8	Positive
1104109	BaPd	225	8	Positive
1104118	CuSb	225	8	Positive
1104147	TiSi	225	8	Positive
1104249	YH	225	8	Positive
1104252	AlAs	225	8	Positive
1104282	AlN	225	8	Positive
1104314	KF	225	8	Positive
1104335	GaSb	225	8	Positive
1104403	SrS	225	8	Positive
1104408	GeBi	225	8	Positive
1104488	AgBr	225	8	Positive
1104530	BMo	225	8	Positive
1104552	BaAu	225	8	Positive
1104590	KI	225	8	Positive
1104602	TlAu	225	8	Positive
1104617	HfSi	225	8	Positive
1104680	AgCl	225	8	Positive
1104773	HfAs	225	8	Positive
1104844	HfGe	225	8	Positive
1104886	InI	225	8	Positive
1104906	InN	225	8	Positive
1104920	GaBr	225	8	Positive
1104949	SbPt	225	8	Positive
1105005	CsCl	225	8	Positive
1105039	RbAg	225	8	Positive
1105090	TlSe	225	8	Positive
1105129	BaO	225	8	Positive
1105148	KAu	225	8	Positive
1105177	BaAg	225	8	Positive
1105292	NaCl	225	8	Positive
1105325	TaB	225	8	Positive
1105437	TiGe	225	8	Positive
1105460	TlAs	225	8	Positive
1105466	SiAs	225	8	Positive
1105507	GaI	225	8	Positive
1105539	SnAu	225	8	Positive
1105629	KBr	225	8	Positive
1105689	SrAg	225	8	Positive
1105698	MnH	225	8	Positive
1105735	SrAu	225	8	Positive
1105751	CaSe	225	8	Positive
1105788	KAg	225	8	Positive
1105828	CsHg	225	8	Positive
1105854	AlP	225	8	Positive
1105884	GaN	225	8	Positive
1105895	HfP	225	8	Positive
1105925	SiSb	225	8	Positive
1106032	TiP	225	8	Positive
1106203	AlTe	225	8	Positive
1106242	GaTe	225	8	Positive
1106281	CsAg	225	8	Positive
1106307	ZrPb	225	8	Positive
1106321	TePb	225	8	Positive
1106355	FeH	225	8	Positive
1106363	AgTe	225	8	Positive
1106392	CrH	225	8	Positive
1106420	SnSb	225	8	Positive
1106426	CuTe	225	8	Positive
1106463	SrPd	225	8	Positive
1106486	SiP	225	8	Positive
1106510	PbAu	225	8	Positive
1106516	BaPt	225	8	Positive
1106527	AgF	225	8	Positive
1106588	CrB	225	8	Positive
1106615	BaH	225	8	Positive
1106628	TaH	225	8	Positive
1106635	SnP	225	8	Positive
1106791	CoH	225	8	Positive
1106808	VH	225	8	Positive
1106844	SnAs	225	8	Positive
1106847	BaCu	225	8	Positive
1106878	CsBr	225	8	Positive
1106917	ZnO	225	8	Positive
1106946	ZrSi	225	8	Positive
1106958	CdO	225	8	Positive
1106960	AsPb	225	8	Positive
1106961	ZrGe	225	8	Positive
1107010	RbAu	225	8	Positive
1107016	BiPt	225	8	Positive
1209314	Cs2NaAlH6	225	40	Positive
1209420	Cs2RbAlF6	225	40	Positive
1209421	Cs2KAlF6	225	40	Positive
1234981	MoH	225	8	Positive
1234986	ScH	225	8	Positive
1235046	TiN	225	8	Positive
1235065	PPb	225	8	Positive
1261041	Ba2HfAlS6	225	40	Positive
1288223	Cs2KAlF6	225	40	Positive
1288224	Cs2RbAlF6	225	40	Positive
1364833	K2ZrTeO6	225	40	Positive
1365091	Ba2CaSeO6	225	40	Positive
1365379	Cs2RbCoH6	225	40	Positive
1366187	Rb2NaAlH6	225	40	Positive
1367330	Ba2ScAuO6	225	40	Positive
1368245	Cs2RbAlH6	225	40	Positive
1369030	KRb2AlH6	225	40	Positive
1369227	Ba2SrSeO6	225	40	Positive
1370196	Cs2KRhCl6	225	40	Positive
1373213	K2HfTeO6	225	40	Positive
1376008	Na2LiCoH6	225	40	Positive
1377290	KRb2CoH6	225	40	Positive
1377972	Cs2KAlH6	225	40	Positive
1428799	Cs2NaCoCl6	225	40	Positive
1428878	Na2CuNiH6	225	40	Positive
1428881	Na2ZnCoH6	225	40	Positive
1428886	Na2LiNiH6	225	40	Positive
1428894	Ca2CuH6Pt	225	40	Positive
1428897	Ca2H6PdRh	225	40	Positive
1428899	Ca2NiH6Pt	225	40	Positive
1428900	Ca2H6IrRh	225	40	Positive
1428906	Ca2CoAgH6	225	40	Positive
1428908	Ca2NiH6Pt	225	40	Positive
1428909	Ca2H6PtAu	225	40	Positive
1428910	Ca2H6IrAu	225	40	Positive
1428911	Ca2CoH6Au	225	40	Positive
1428921	LiCa2CoH6	225	40	Positive
1428925	LiCa2MnH6	225	40	Positive
1428939	Sr2CoAgH6	225	40	Positive
1428941	Sr2AgH6Ir	225	40	Positive
1428953	Sr2NiH6Au	225	40	Positive
1428954	Sr2CoH6Au	225	40	Positive
1428955	Sr2H6IrAu	225	40	Positive
1428967	Sr2LiCoH6	225	40	Positive
1428979	Sr2LiTcH6	225	40	Positive
1428983	K2NaH6Rh	225	40	Positive
1428989	K2TlH6Rh	225	40	Positive
1428999	Ba2NaCoH6	225	40	Positive
1429007	Ba2HgH6Rh	225	40	Positive
1429019	Li2NiH6Pd	225	40	Positive
1429130	K2HfTeO6	225	40	Positive
1429131	K2MgIrO6	225	40	Positive
1429134	Rb2InOsO6	225	40	Positive
1429135	Rb2YOsO6	225	40	Positive
1429138	Rb2CaOsO6	225	40	Positive
1429141	Rb2OsPbO6	225	40	Positive
1429143	Ba2YTcO6	225	40	Positive
1429144	Ba2YPdO6	225	40	Positive
1429146	Ba2ZnPtO6	225	40	Positive
1429162	YTl2OsO6	225	40	Positive
1429164	Cs2YOsO6	225	40	Positive
1429165	Cs2CaOsO6	225	40	Positive
1430830	Cs2AgRhF6	225	40	Positive
1430862	Cs2NaHgF6	225	40	Positive
1431102	Cs2NaHgF6	225	40	Positive
1431150	Na2CoH6Pd	225	40	Positive
1431198	Ca2CoH6Pd	225	40	Positive
1431201	Ca2H6IrPd	225	40	Positive
1431203	Ca2H6PdPt	225	40	Positive
1431207	Ca2CoH6Pt	225	40	Positive
1431208	Ca2H6IrPt	225	40	Positive
1431218	Sr2H6IrPd	225	40	Positive
1431219	Sr2H6PdRh	225	40	Positive
1431221	Sr2H6PdPt	225	40	Positive
1431245	Sr2CoNiH6	225	40	Positive
1431247	Sr2H6RhAu	225	40	Positive
1431250	Sr2H6IrPt	225	40	Positive
1431270	K2HfVH6	225	40	Positive
1431315	K2CdH6Rh	225	40	Positive
1431428	Ba2AgH6Rh	225	40	Positive
1431444	Ba2H6RhAu	225	40	Positive
1432196	Rb2NaCoCl6	225	40	Positive
1432319	Rb2LiCoCl6	225	40	Positive
1432574	Cs2AgRhCl6	225	40	Positive
1432599	Cs2NaRhCl6	225	40	Positive
1432636	Cs2KCoCl6	225	40	Positive
1432641	Cs2KAlCl6	225	40	Positive
1432730	Sr2H6IrPt	225	40	Positive
1432732	Sr2H6PtRh	225	40	Positive
1432733	Sr2H6PtRh	225	40	Positive
1432734	Sr2H6IrRh	225	40	Positive
1433497	K2ScIrO6	225	40	Positive
1433505	K2YIrO6	225	40	Positive
1433507	K2YOsO6	225	40	Positive
1433510	K2YTeO6	225	40	Positive
1433514	K2HfOsO6	225	40	Positive
1433584	K2ZrTaO6	225	40	Positive
1433586	K2ZrOsO6	225	40	Positive
1433587	K2ZrTeO6	225	40	Positive
1433589	Rb2ScOsO6	225	40	Positive
1433591	Rb2MgOsO6	225	40	Positive
1541451	Cs2AgPbCl6	225	40	Positive
1543163	Cs2NaHfCl6	225	40	Positive
1667672	Ca2H6PdPt	225	40	Positive
1710866	K2NaAlF6	225	40	Positive
1717400	Ba2AlAsO6	225	40	Positive
1797	NbN	225	8	Negative
6116	ZnTe	225	8	Negative
6117	HgTe	225	8	Negative
6338	SnF3	225	32	Negative
6912	CrN	225	8	Negative
8112	MoC	225	8	Negative
8503	K3Sb	225	16	Negative
10102	HgS	225	8	Negative
10103	HgSe	225	8	Negative
10653	LiAg2Sn	225	16	Negative
10919	Cs3Bi	225	16	Negative
10935	K3Bi	225	16	Negative
10955	YBiPd2	225	16	Negative
10961	Rb3Bi	225	16	Negative
10992	Ca3In	225	16	Negative
11007	Ca3Tl	225	16	Negative
11469	CuO	225	8	Negative
11590	SeS	225	8	Negative
12007	Ba2YBiO6	225	40	Negative
12031	Cs2NaYCl6	225	40	Negative
12032	Cs2NaYBr6	225	40	Negative
13641	ZrO	225	8	Negative
14102	CuCl	225	8	Negative
14105	CuBr	225	8	Negative
18181	YZn	225	8	Negative
19483	LiAg2Sn	225	16	Negative
20241	MoN	225	8	Negative
21451	TcB	225	8	Negative
22452	Na3As	225	16	Negative
27280	GeTe	225	8	Negative
29026	CdS	225	8	Negative
30644	K3Sb	225	16	Negative
31332	CdTe	225	8	Negative
299247	TiBe3	225	16	Negative
301126	Na3P	225	16	Negative
303550	Ca3Al	225	16	Negative
307902	Ba3In	225	16	Negative
307915	K3Hg	225	16	Negative
307929	AgSb3	225	16	Negative
307933	HgBi3	225	16	Negative
307968	Mg3Pd	225	16	Negative
307974	BiPt3	225	16	Negative
308006	SrHg3	225	16	Negative
308011	AgPd3	225	16	Negative
308050	Ga3Ge	225	16	Negative
308064	TaAu3	225	16	Negative
308095	LiSb3	225	16	Negative
308102	Y3Sc	225	16	Negative
308113	K3P	225	16	Negative
308172	Sr3Tl	225	16	Negative
308210	Zr3Ta	225	16	Negative
308232	Mg3Pb	225	16	Negative
308244	CdHg3	225	16	Negative
308294	TiAu3	225	16	Negative
308295	RbHg3	225	16	Negative
308300	SbPd3	225	16	Negative
308309	BaCl3	225	16	Negative
308330	GaAg3	225	16	Negative
308340	NaAl3	225	16	Negative
308354	BaBr3	225	16	Negative
308384	K3Pt	225	16	Negative
308459	Na3Ga	225	16	Negative
308467	YPd3	225	16	Negative
308520	GaHg3	225	16	Negative
308554	Ti3Mo	225	16	Negative
308587	Mo3Ru	225	16	Negative
308687	InPd3	225	16	Negative
308696	Ca3Cd	225	16	Negative
308708	Ag3Pt	225	16	Negative
308737	Y3Mg	225	16	Negative
308772	CuPt3	225	16	Negative
308773	Be3Os	225	16	Negative
308783	CdPt3	225	16	Negative
308808	InAu3	225	16	Negative
308809	Mg3Hg	225	16	Negative
308863	ZrH3	225	16	Negative
308878	K3Pb	225	16	Negative
308888	In3Pb	225	16	Negative
308891	Rb3Li	225	16	Negative
308906	ZrAg3	225	16	Negative
308909	Te3Pb	225	16	Negative
308939	Pd3Pb	225	16	Negative
308941	NaAg3	225	16	Negative
308983	Rb3Sb	225	16	Negative
309018	Cs3Li	225	16	Negative
309099	TlPb3	225	16	Negative
309108	Cd3Pt	225	16	Negative
309113	MgSb3	225	16	Negative
309119	HgTe3	225	16	Negative
309133	Pd3Rh	225	16	Negative
309181	Mg3Au	225	16	Negative
309188	Ga3Pb	225	16	Negative
309233	NbTc3	225	16	Negative
309259	Li3Pt	225	16	Negative
309281	YH3	225	16	Negative
309294	Cd3Ga	225	16	Negative
309300	CaPd3	225	16	Negative
309303	Na3Au	225	16	Negative
309309	MgAg3	225	16	Negative
309319	Al3Zn	225	16	Negative
309341	Rb3Bi	225	16	Negative
309358	RbNa3	225	16	Negative
309406	Na3Si	225	16	Negative
309410	AlPd3	225	16	Negative
309476	K3Tl	225	16	Negative
309499	NbPd3	225	16	Negative
309504	LiAu3	225	16	Negative
309510	NaPd3	225	16	Negative
309529	BiPd3	225	16	Negative
309548	Cs3Pb	225	16	Negative
309586	Cs3Cd	225	16	Negative
309636	Ca3Tl	225	16	Negative
309693	LiCd3	225	16	Negative
309711	Al3Ga	225	16	Negative
309723	AlGa3	225	16	Negative
309734	GaPd3	225	16	Negative
309739	Tc3Mo	225	16	Negative
309740	Be3Co	225	16	Negative
309751	K3Au	225	16	Negative
309755	TlPd3	225	16	Negative
309770	PdPt3	225	16	Negative
309783	CaAg3	225	16	Negative
309789	TiBe3	225	16	Negative
309793	GeAu3	225	16	Negative
309798	Mo3Os	225	16	Negative
309837	Zr3Ti	225	16	Negative
309881	TlPt3	225	16	Negative
309896	GaSb3	225	16	Negative
309899	Pt3Rh	225	16	Negative
309903	BaHg3	225	16	Negative
309921	Na3Ag	225	16	Negative
309922	TiH3	225	16	Negative
309950	Be3Ru	225	16	Negative
309955	GaAu3	225	16	Negative
309980	LiGa3	225	16	Negative
310012	Ba3Mg	225	16	Negative
310052	Ag3Hg	225	16	Negative
310077	Cs3P	225	16	Negative
310082	YAu3	225	16	Negative
310185	CsF3	225	16	Negative
310205	Mg3Tl	225	16	Negative
310226	Nb3Mo	225	16	Negative
310230	Cd3Pd	225	16	Negative
310247	BiSb3	225	16	Negative
310275	PtAu3	225	16	Negative
310308	Na3Pd	225	16	Negative
310324	HfAu3	225	16	Negative
310343	InBi3	225	16	Negative
310344	TiPd3	225	16	Negative
310370	RbBr3	225	16	Negative
310383	SnPd3	225	16	Negative
310388	NaIn3	225	16	Negative
310435	HgPd3	225	16	Negative
310468	InPt3	225	16	Negative
310489	BeTc3	225	16	Negative
310490	Hf3Nb	225	16	Negative
310617	Na3As	225	16	Negative
310682	Hf3Zr	225	16	Negative
310686	SbPt3	225	16	Negative
310690	CdPd3	225	16	Negative
310691	YAg3	225	16	Negative
310709	Be3Ir	225	16	Negative
310735	Bi3Pb	225	16	Negative
310783	BaLi3	225	16	Negative
310801	ZrPd3	225	16	Negative
310856	Zr3Mo	225	16	Negative
310883	Ag3Pd	225	16	Negative
310991	HgPb3	225	16	Negative
310993	Mg3Al	225	16	Negative
311025	GePd3	225	16	Negative
311033	Na3Bi	225	16	Negative
311045	ZnPd3	225	16	Negative
311119	Rb3Hg	225	16	Negative
311124	Na3Zn	225	16	Negative
311125	HgSb3	225	16	Negative
311180	GeSb3	225	16	Negative
311200	GaBi3	225	16	Negative
311210	Te3As	225	16	Negative
311232	CaCd3	225	16	Negative
311234	Tc3Ge	225	16	Negative
311256	Nb3Cr	225	16	Negative
311259	Ti3Re	225	16	Negative
311291	YSc3	225	16	Negative
311306	InHg3	225	16	Negative
311325	Na3Sb	225	16	Negative
311376	CsTl3	225	16	Negative
311406	Be3Rh	225	16	Negative
311455	TaTi3	225	16	Negative
311479	ZnAu3	225	16	Negative
311498	LiPb3	225	16	Negative
311505	AsPd3	225	16	Negative
311507	K3Bi	225	16	Negative
311510	HgPt3	225	16	Negative
311554	Ga3Bi	225	16	Negative
311589	Li3N	225	16	Negative
311612	Na3Sr	225	16	Negative
311649	In3Sn	225	16	Negative
311668	Na3P	225	16	Negative
311705	V3Cr	225	16	Negative
311711	LiAg3	225	16	Negative
311717	SnTe3	225	16	Negative
311739	TlBi3	225	16	Negative
311774	Hf3In	225	16	Negative
311807	Ca3In	225	16	Negative
311843	Rb3P	225	16	Negative
311856	SnAu3	225	16	Negative
311877	HfZr3	225	16	Negative
311941	K3Ag	225	16	Negative
311969	CaAu3	225	16	Negative
312000	Ti3Nb	225	16	Negative
312011	Li3Ca	225	16	Negative
312039	LiHg3	225	16	Negative
312059	KBr3	225	16	Negative
312095	CuAu3	225	16	Negative
312153	Ga3Sn	225	16	Negative
312157	LiPd3	225	16	Negative
312201	Mg3Ag	225	16	Negative
312224	ZnAg3	225	16	Negative
312238	Tl3Sb	225	16	Negative
312249	ScH3	225	16	Negative
312276	CdBi3	225	16	Negative
312328	MgPd3	225	16	Negative
312334	KHg3	225	16	Negative
312341	VRe3	225	16	Negative
312350	SnPt3	225	16	Negative
312364	Ti3Tc	225	16	Negative
312375	VTc3	225	16	Negative
312443	Cs3Hg	225	16	Negative
312444	AlAu3	225	16	Negative
312463	Ag3Au	225	16	Negative
312553	SnBi3	225	16	Negative
312557	Mg3Ga	225	16	Negative
312638	NbV3	225	16	Negative
312743	MgPb3	225	16	Negative
312745	Rb3Cd	225	16	Negative
312765	BiPb3	225	16	Negative
312806	Cs3As	225	16	Negative
312814	MgBi3	225	16	Negative
312834	Na3Pt	225	16	Negative
312844	K3Sb	225	16	Negative
312846	NaBi3	225	16	Negative
312851	Na3Ge	225	16	Negative
312857	MgSc3	225	16	Negative
312884	Pd3Au	225	16	Negative
312889	SrLi3	225	16	Negative
312965	Cr3Os	225	16	Negative
312986	CsNa3	225	16	Negative
312995	Ba3Tl	225	16	Negative
313028	Rb3Tl	225	16	Negative
313036	ZnPt3	225	16	Negative
313102	Mg3Zn	225	16	Negative
313136	MgZr3	225	16	Negative
313158	Be3Fe	225	16	Negative
313188	HfH3	225	16	Negative
313206	K3As	225	16	Negative
313211	BaTl3	225	16	Negative
313213	Ag3Sb	225	16	Negative
313247	LiIn3	225	16	Negative
313259	Nb3V	225	16	Negative
313262	In3Bi	225	16	Negative
313279	TlSb3	225	16	Negative
313310	Mg3Ir	225	16	Negative
313312	Rb3Au	225	16	Negative
313332	NaSb3	225	16	Negative
313340	Zr3Sc	225	16	Negative
313358	CdSb3	225	16	Negative
313365	LiTl3	225	16	Negative
313396	ScAg3	225	16	Negative
313400	Sn3Hg	225	16	Negative
313402	Mg3Sn	225	16	Negative
313407	GaTc3	225	16	Negative
313434	TaRe3	225	16	Negative
313443	Mg3In	225	16	Negative
313492	Sc3Tc	225	16	Negative
313526	BaF3	225	16	Negative
313542	MoPd3	225	16	Negative
313545	InAg3	225	16	Negative
313553	Mg3Pt	225	16	Negative
313573	Zn3Pd	225	16	Negative
313583	NaHg3	225	16	Negative
313589	MgAl3	225	16	Negative
313618	SnSb3	225	16	Negative
313643	Be3Pt	225	16	Negative
313649	K3Cd	225	16	Negative
313652	NbAu3	225	16	Negative
313656	AlAg3	225	16	Negative
313750	Pd3Se	225	16	Negative
313757	CaHg3	225	16	Negative
313770	NiPd3	225	16	Negative
313790	CaTl3	225	16	Negative
313793	SiTc3	225	16	Negative
313816	NbRe3	225	16	Negative
313822	ScPd3	225	16	Negative
313826	PdAu3	225	16	Negative
313838	RbTl3	225	16	Negative
313884	Al3Ag	225	16	Negative
313891	Rb3As	225	16	Negative
313900	TiV3	225	16	Negative
313904	MnV3	225	16	Negative
313977	TlHg3	225	16	Negative
313980	Cs3Tl	225	16	Negative
313983	NaPb3	225	16	Negative
314028	Li3Ir	225	16	Negative
314092	Ca3Al	225	16	Negative
314122	Zr3Tc	225	16	Negative
314123	BiTe3	225	16	Negative
314143	Li3Pd	225	16	Negative
314204	Tl3As	225	16	Negative
314224	TePd3	225	16	Negative
314226	CdAu3	225	16	Negative
314256	CsHg3	225	16	Negative
314286	HgAu3	225	16	Negative
314300	YHg3	225	16	Negative
314334	Mg3Rh	225	16	Negative
314352	Be3Pd	225	16	Negative
314361	Pd3Pt	225	16	Negative
314424	Mg3Cd	225	16	Negative
314470	Li3Ni	225	16	Negative
314476	NaCd3	225	16	Negative
314486	Zr3Re	225	16	Negative
314495	Cd3Rh	225	16	Negative
314502	ZrAu3	225	16	Negative
314527	Pt3Au	225	16	Negative
314533	NaAu3	225	16	Negative
314546	LiBi3	225	16	Negative
314565	LiAl3	225	16	Negative
314566	CdAg3	225	16	Negative
314571	BePt3	225	16	Negative
314599	MgAu3	225	16	Negative
314638	V3Mo	225	16	Negative
314668	ScAu3	225	16	Negative
314721	ScHg3	225	16	Negative
314747	CuPd3	225	16	Negative
314773	Be3Au	225	16	Negative
314796	Zr3Nb	225	16	Negative
314799	Cs3Bi	225	16	Negative
314829	VPd3	225	16	Negative
314834	Na3Hg	225	16	Negative
314836	InSb3	225	16	Negative
314867	V3Tc	225	16	Negative
314872	Sb3Pb	225	16	Negative
314883	AgAu3	225	16	Negative
327061	ReH	225	8	Negative
327216	TiSe	225	8	Negative
327272	VN	225	8	Negative
360646	Sc2HgBi	225	16	Negative
360700	Sc2InPd	225	16	Negative
361289	Sc2TlPd	225	16	Negative
361368	Sc2InSb	225	16	Negative
361945	Sc2SbAu	225	16	Negative
362000	Sc2TlBi	225	16	Negative
362038	Sc2SnAu	225	16	Negative
362065	Sc2TlNi	225	16	Negative
363281	MgSiPt2	225	16	Negative
364074	NaInPt2	225	16	Negative
364582	CaInPt2	225	16	Negative
364682	AlCdPt2	225	16	Negative
364741	CdBiPt2	225	16	Negative
364962	ScAlPt2	225	16	Negative
365081	MgInPt2	225	16	Negative
365214	ZnCdPt2	225	16	Negative
365401	NaHfPt2	225	16	Negative
365551	MgGaPt2	225	16	Negative
366093	Na2InPb	225	16	Negative
366163	BaNa2Cd	225	16	Negative
366282	Na2HgPt	225	16	Negative
366304	Na2SbPb	225	16	Negative
366353	Na2CdIn	225	16	Negative
366482	Na2InSb	225	16	Negative
366490	Na2TlAu	225	16	Negative
366584	Na2SbTe	225	16	Negative
366614	Na2InBi	225	16	Negative
367321	KNa2Hg	225	16	Negative
367664	Na2SnHg	225	16	Negative
367876	Na2PbAu	225	16	Negative
368038	Na2SrIn	225	16	Negative
368125	Na2TlIn	225	16	Negative
370807	HfTaOs2	225	16	Negative
371056	YHfTl2	225	16	Negative
371271	BaTl2Cd	225	16	Negative
371306	BaNaTl2	225	16	Negative
371425	SrTl2Bi	225	16	Negative
371445	CsTl2Pb	225	16	Negative
371493	LiTl2Cd	225	16	Negative
371612	CsTl2Bi	225	16	Negative
371849	CaTl2Pd	225	16	Negative
371958	KBaTl2	225	16	Negative
372075	NaTl2Sb	225	16	Negative
372173	NaSrTl2	225	16	Negative
372382	SrTl2Sn	225	16	Negative
372634	SrLiTl2	225	16	Negative
373079	CaTl2Sn	225	16	Negative
393954	SrMg2Tl	225	16	Negative
394169	Mg2InAu	225	16	Negative
394271	BaMg2Cd	225	16	Negative
394384	Mg2ZnNi	225	16	Negative
394589	Mg2GaAu	225	16	Negative
394731	YMg2Ir	225	16	Negative
394847	YMg2Ag	225	16	Negative
394866	Mg2BiPb	225	16	Negative
394987	Mg2ZnPd	225	16	Negative
395163	Mg2SbAu	225	16	Negative
395257	Mg2SnAu	225	16	Negative
395440	Mg2ZnIn	225	16	Negative
395677	BaMg2Tl	225	16	Negative
395858	Mg2GeRh	225	16	Negative
395889	Mg2InAg	225	16	Negative
409214	Y2HgBi	225	16	Negative
409269	Y2InPd	225	16	Negative
409369	Y2AsAu	225	16	Negative
409496	Y2TlCo	225	16	Negative
409512	Y2InAu	225	16	Negative
409537	Y2AlAu	225	16	Negative
409615	Y2CdPt	225	16	Negative
409838	Y2TlSn	225	16	Negative
409863	Y2TlPd	225	16	Negative
409909	Y2GeIr	225	16	Negative
410003	Y2AgBi	225	16	Negative
410562	Y2TlBi	225	16	Negative
410564	Y2GaPt	225	16	Negative
410600	Y2SnAu	225	16	Negative
410655	Y2NiHg	225	16	Negative
410733	Y2AlPt	225	16	Negative
410743	Y2CdBi	225	16	Negative
410778	Y2GaNi	225	16	Negative
411021	Y2InRh	225	16	Negative
411167	Y2CdNi	225	16	Negative
411267	Y2BePt	225	16	Negative
411312	Y2GaPd	225	16	Negative
411328	Y2PbAu	225	16	Negative
411628	Y2MgAu	225	16	Negative
411629	Y2InCo	225	16	Negative
414225	ZrCo2Ge	225	16	Negative
414373	Hf2TaAu	225	16	Negative
414481	Hf2AsAu	225	16	Negative
414633	Hf2ZnCo	225	16	Negative
415436	Hf2ZnIr	225	16	Negative
415465	Hf2CoSn	225	16	Negative
416213	Hf2SiPt	225	16	Negative
416935	Ba2InPd	225	16	Negative
416956	Ba2MgSi	225	16	Negative
416982	Ba2MgPb	225	16	Negative
416994	Ba2TlGa	225	16	Negative
417168	Ba2BiAs	225	16	Negative
417212	Ba2InPb	225	16	Negative
417309	Ba2GaPb	225	16	Negative
417362	Ba2BiPd	225	16	Negative
417401	Ba2NaSi	225	16	Negative
417496	Ba2TlSn	225	16	Negative
417522	Ba2TlPd	225	16	Negative
417604	Ba2LiGa	225	16	Negative
417648	Ba2CaHg	225	16	Negative
417732	Ba2InBi	225	16	Negative
417848	Ba2LiPb	225	16	Negative
417874	Ba2BiPb	225	16	Negative
418029	Ba2TlGe	225	16	Negative
418121	Ba2AlTl	225	16	Negative
418226	Ba2TlBi	225	16	Negative
418289	Ba2SnPb	225	16	Negative
418516	Ba2SnBi	225	16	Negative
418798	Ba2TlSb	225	16	Negative
418859	Ba2GaRh	225	16	Negative
418880	Ba2BiSb	225	16	Negative
418901	Ba2MgPt	225	16	Negative
418913	Ba2MgAl	225	16	Negative
418981	Ba2GaPd	225	16	Negative
419057	Ba2TlRh	225	16	Negative
419244	Ba2TlIn	225	16	Negative
419257	Ba2CdRh	225	16	Negative
442641	Ca2SbPd	225	16	Negative
444298	Ca2HgTe	225	16	Negative
444502	Ca2BiSb	225	16	Negative
444598	SrCa2Ge	225	16	Negative
444875	LiCa2Si	225	16	Negative
445152	SrLi2Ga	225	16	Negative
445628	BaLi2Ge	225	16	Negative
445836	Li2CaHg	225	16	Negative
445895	Li2PtAu	225	16	Negative
446208	Li2TlGe	225	16	Negative
446223	Li2GaBi	225	16	Negative
446761	Li2ZnSi	225	16	Negative
450401	ScBiRh2	225	16	Negative
451140	YSbRh2	225	16	Negative
451303	YSnRh2	225	16	Negative
451875	ScTaRh2	225	16	Negative
452356	HfTiRh2	225	16	Negative
452724	SrIn2Pb	225	16	Negative
453536	LiCaIn2	225	16	Negative
453786	ScIn2Ru	225	16	Negative
453787	In2AgPd	225	16	Negative
453825	LiYIn2	225	16	Negative
453935	NaIn2Sb	225	16	Negative
454479	NaIn2Bi	225	16	Negative
454648	LiIn2Te	225	16	Negative
455224	CaZnIn2	225	16	Negative
455254	LiZrIn2	225	16	Negative
460070	HfScIr2	225	16	Negative
463038	BePd2Au	225	16	Negative
463122	YGePd2	225	16	Negative
463131	CaSbPd2	225	16	Negative
463178	ScBiPd2	225	16	Negative
463191	AlHgPd2	225	16	Negative
463421	CdGaPd2	225	16	Negative
463486	SbPd2Pb	225	16	Negative
463519	InGaPd2	225	16	Negative
463548	ScSiPd2	225	16	Negative
463663	GaPd2Au	225	16	Negative
463669	InSbPd2	225	16	Negative
463756	CaBiPd2	225	16	Negative
463801	InBiPd2	225	16	Negative
463915	YSbPd2	225	16	Negative
463927	KSrPd2	225	16	Negative
464102	MgAsPd2	225	16	Negative
467670	GaHgPd2	225	16	Negative
467742	NaSrPd2	225	16	Negative
467749	CaGaPd2	225	16	Negative
467774	TlZnPd2	225	16	Negative
467847	SnPd2Pb	225	16	Negative
467862	BeGaPd2	225	16	Negative
467884	NaCaPd2	225	16	Negative
467918	GaSnPd2	225	16	Negative
467954	CuPd2Pb	225	16	Negative
467960	TeAsPd2	225	16	Negative
468077	SnBiPd2	225	16	Negative
468115	NaPd2Pb	225	16	Negative
468137	CaGePd2	225	16	Negative
468441	BeInPd2	225	16	Negative
468445	BiSbPd2	225	16	Negative
468446	ZnHgPd2	225	16	Negative
468490	SnSbPd2	225	16	Negative
468609	BaCaPd2	225	16	Negative
468701	YGaPd2	225	16	Negative
468837	NaPd2Au	225	16	Negative
468842	LiBiPd2	225	16	Negative
468863	SbAsPd2	225	16	Negative
469516	K2HgPt	225	16	Negative
481766	BaZn2In	225	16	Negative
483370	CaZn2Rh	225	16	Negative
483910	Zn2PdAu	225	16	Negative
484240	Zn2CuPt	225	16	Negative
485139	CaBiSb2	225	16	Negative
485173	NaSb2Pd	225	16	Negative
485638	NaSrSb2	225	16	Negative
486583	LiSb2Pd	225	16	Negative
487257	MnNb2Si	225	16	Negative
488566	Nb2GaMo	225	16	Negative
493307	NaSrSn2	225	16	Negative
493493	NaYSn2	225	16	Negative
494007	NaLiSn2	225	16	Negative
494247	LiSn2Pd	225	16	Negative
494395	NaSn2Au	225	16	Negative
497114	HgBiPb2	225	16	Negative
497367	SrMgPb2	225	16	Negative
497526	LiRhPb2	225	16	Negative
497917	LiCaPb2	225	16	Negative
497936	PtPb2Au	225	16	Negative
498203	LiYPb2	225	16	Negative
498348	KMgPb2	225	16	Negative
498389	NaScPb2	225	16	Negative
498401	BaSrPb2	225	16	Negative
[truncated: 6,078 more rows]

## Sheet: LTC_Regression_Models_4041
OQMD_ID	Formula	Space_Group_Number	Number of Atoms	LTC_DFT (W/mK)	LTC_DFT_log_Value
3075	Al2ZnS4	227	56	10.361	1.0154
4171	MgAl2O4	227	56	28.944	1.46156
4643	Al2ZnO4	227	56	24.417	1.38769
5215	Zr2CuS4	227	56	3.0688	0.486969
5621	Ag2MoO4	227	56	0.16615	-0.7795
5648	Cd(RhO2)2	227	56	20.055	1.30222
5774	CaAl2	227	24	9.1744	0.962578
6015	MgAl2O4	227	56	30.225	1.48037
6920	Mg(ScS2)2	227	56	7.1807	0.856167
8437	Na2MoO4	227	56	2.1968	0.341791
10095	Zr(TiH2)2	227	56	45.001	1.65322
10353	Be2Ag	227	24	9.0969	0.958893
10390	BaAl2	227	24	2.0056	0.302244
10541	ScAl2	227	24	13.911	1.14336
10584	SrAl2	227	24	3.3328	0.522809
10612	YAl2	227	24	9.5568	0.980312
10659	NaAg2	227	24	1.2585	0.0998532
10858	BaPd2	227	24	2.2845	0.358791
10861	BaPt2	227	24	3.0508	0.484414
10880	Be2Cu	227	24	16.132	1.20769
10890	Be2Nb	227	24	20.847	1.31904
10904	TaBe2	227	24	16.33	1.21299
10907	TiBe2	227	24	15.141	1.18015
11001	CaPd2	227	24	3.6441	0.56159
13324	Sc2MnSe4	227	56	2.781	0.444201
13656	Y2MgSe4	227	56	3.9826	0.600167
17365	HfMo2	227	24	21.347	1.32934
17395	HfZn2	227	24	3.1525	0.498655
17537	YIr2	227	24	5.4835	0.739058
17601	LiPt2	227	24	4.8571	0.686377
17718	ZrMo2	227	24	38.19	1.58195
17730	NaPt2	227	24	4.5932	0.662115
17854	YNi2	227	24	4.36	0.639486
17961	SrPd2	227	24	3.0758	0.487958
18065	SrRh2	227	24	2.3684	0.374455
18084	YRh2	227	24	6.0939	0.784895
18146	TaV2	227	24	21.904	1.34052
18188	ZrZn2	227	24	5.6134	0.749226
18299	TaCr2	227	24	20.474	1.3112
18333	ScFe2	227	24	8.8154	0.945242
18350	ZrFe2	227	24	12.727	1.10473
18443	ZrCr2	227	24	37.136	1.5698
18740	NaAu2	227	24	1.0871	0.0362695
18766	CaRh2	227	24	3.2752	0.515238
18768	CaPt2	227	24	3.4691	0.540217
18769	SrPt2	227	24	3.2695	0.514481
18770	BaRh2	227	24	0.52469	-0.280097
19123	Zn(RhO2)2	227	56	31.64	1.50024
19124	Mn(RhO2)2	227	56	5.0239	0.701041
19125	Co(RhO2)2	227	56	5.412	0.733358
19373	NbCr2	227	24	25.167	1.40083
19393	ScCo2	227	24	17.068	1.23218
19394	YCo2	227	24	7.5774	0.87952
23285	ZrMn2	227	24	1.5613	0.193486
25758	Li2Ca	227	24	1.9528	0.290658
27883	Mn(AlS2)2	227	56	5.4712	0.738083
29028	Y2CdS4	227	56	4.5077	0.653955
29032	Y2CdSe4	227	56	2.6306	0.420055
29360	HfCo2	227	24	7.4222	0.870533
29553	HfCr2	227	24	30.812	1.48872
29601	TiCr2	227	24	87.715	1.94307
30206	HfFe2	227	24	11.077	1.04442
30721	Mg(RhO2)2	227	56	31.893	1.5037
30725	Mg(ScSe2)2	227	56	4.8351	0.684405
31202	ZrCo2	227	24	7.7104	0.887077
431592	Ag(PdO2)2	227	56	2.4857	0.395449
431958	BaY2O4	227	56	5.6403	0.751302
432150	CaY2O4	227	56	10.787	1.0329
432196	Sc2CdO4	227	56	9.628	0.983536
433138	K(RhO2)2	227	56	6.114	0.786325
433216	Li(PdO2)2	227	56	1.3735	0.137829
433245	LiZr2O4	227	56	2.3499	0.371049
433379	Rb2MoO4	227	56	1.3768	0.138871
433431	NaTi2O4	227	56	4.2445	0.627827
433586	Rb2OsO4	227	56	0.29453	-0.53087
433998	SrY2O4	227	56	9.0773	0.957957
646874	BiAu2	227	24	0.33303	-0.477517
647551	KBi2	227	24	0.64079	-0.193284
647552	RbBi2	227	24	0.87399	-0.0584935
647553	CsBi2	227	24	0.71196	-0.147544
673103	LiTi2O4	227	56	7.0849	0.850334
675547	Mn(GaO2)2	227	56	6.0926	0.784803
685941	MnAl2O4	227	56	4.9306	0.6929
695393	NaTi2O4	227	56	3.8717	0.587902
1235122	LiTi2O4	227	56	6.9558	0.842347
1236460	I2O	227	24	3.9843	0.600352
1237517	SI2	227	24	0.29813	-0.525594
1238375	SeI2	227	24	0.050858	-1.29364
1250500	Y2MnSe4	227	56	2.1234	0.327032
1250556	Y2HgSe4	227	56	1.2629	0.101369
1283409	Ag(Te2Ir)2	227	56	3.8119	0.581141
1283440	Al2ZnS4	227	56	9.5859	0.981633
1283503	Cd(IrS2)2	227	56	19.381	1.28738
1283510	Co2CuSe4	227	56	6.9142	0.839742
1283652	Hg(IrS2)2	227	56	7.2629	0.86111
1283653	Hg(IrSe2)2	227	56	5.1234	0.709558
1283655	Hg(RhS2)2	227	56	5.4385	0.735479
1283709	Li(IrS2)2	227	56	0.1197	-0.921906
1283719	Li(RhS2)2	227	56	0.28602	-0.543604
1283731	LiZr2O4	227	56	2.7383	0.437481
1283732	Li(ZrS2)2	227	56	1.8357	0.263802
1283733	Li(ZrSe2)2	227	56	1.0144	0.00620924
1283773	Mg(AlS2)2	227	56	8.926	0.950657
1283774	Mg(AlSe2)2	227	56	5.5823	0.746813
1283801	Mg(ScSe2)2	227	56	4.8454	0.68533
1283850	MnAl2O4	227	56	4.9309	0.692926
1283851	Mn(AlS2)2	227	56	5.537	0.743275
1283852	Mn(AlSe2)2	227	56	4.4727	0.65057
1283861	Mn(GaO2)2	227	56	6.0634	0.782716
1283867	Mn(IrS2)2	227	56	3.3149	0.52047
1283901	Sc2AlS4	227	56	8.4275	0.925699
1283903	Sc2CdO4	227	56	9.0993	0.959008
1284056	Y2CdSe4	227	56	2.7585	0.440673
1284075	Y2HgS4	227	56	1.679	0.225051
1284076	Y2HgSe4	227	56	1.3234	0.121691
1284078	Y2MgS4	227	56	5.9897	0.777405
1284080	Y2MnS4	227	56	4.4746	0.650754
1284081	Y2MnSe4	227	56	2.2875	0.359361
1284110	Zn(IrS2)2	227	56	18.023	1.25583
1284141	Zr2MnS4	227	56	2.0477	0.311266
1897	ScAs	225	8	52.519	1.72032
1898	ScSb	225	8	35.192	1.54644
2577	MgO	225	8	51.042	1.70793
2642	Li3Tl	225	16	2.5634	0.408816
3009	LiCu2Si	225	16	30.618	1.48598
3682	NaBr	225	8	2.4551	0.390069
3683	KCl	225	8	8.0107	0.90367
3686	RbBr	225	8	4.3815	0.641623
4109	RbI	225	8	1.9651	0.293385
4138	ScS	225	8	52.858	1.72311
4149	HfC	225	8	80.781	1.90731
4151	ZrC	225	8	64.492	1.80951
5166	LiCl	225	8	3.2096	0.506451
5177	ZrN	225	8	132.04	2.12071
5178	NbC	225	8	2030.3	3.30756
5179	TaC	225	8	1283.3	3.10833
5181	CaO	225	8	23.823	1.377
5182	SrO	225	8	9.9728	0.998817
5426	LiBr	225	8	1.6956	0.229323
5427	LiI	225	8	1.2531	0.0979857
5625	SrSe	225	8	19.48	1.28959
5626	CaS	225	8	31.975	1.50481
5627	MgS	225	8	18.59	1.26928
5686	NaF	225	8	24.566	1.39033
5695	BaTe	225	8	10.57	1.02407
5783	BaS	225	8	6.6782	0.824659
6913	YN	225	8	20.087	1.30292
6974	PbSe	225	8	1.1561	0.0629954
7649	CaTe	225	8	9.0906	0.958593
7771	GeSb	225	8	9.7409	0.988599
8089	KH	225	8	8.1729	0.912376
8113	ScC	225	8	52.322	1.71868
8173	BaSe	225	8	9.6475	0.984415
8353	NaI	225	8	1.3589	0.133187
8354	CsF	225	8	1.461	0.16465
8485	InSb	225	8	2.5101	0.399691
10077	NiH	225	8	12.581	1.09972
10081	RbH	225	8	4.3185	0.635333
10385	HfAlAu2	225	16	0.74173	-0.129754
10466	TiAlFe2	225	16	36.085	1.55733
10473	HfAlNi2	225	16	2.2674	0.355528
10505	Mn2AlV	225	16	32.082	1.50626
10768	Li3Au	225	16	1.2607	0.100612
10938	Li3Bi	225	16	2.791	0.44576
10963	ScBi	225	8	56.186	1.74963
10971	YBi	225	8	18.268	1.26169
11166	InTe	225	8	2.7965	0.446615
11321	TlI	225	8	0.54234	-0.265728
11506	CsI	225	8	1.816	0.259116
11507	TlCl	225	8	0.53364	-0.272752
11508	TlBr	225	8	0.45329	-0.343624
11516	ScO	225	8	74.095	1.86979
11589	PbS	225	8	1.7995	0.255152
12030	Cs2LiYCl6	225	40	0.35587	-0.448709
12625	CsH	225	8	2.0999	0.322199
13677	HfB	225	8	204.96	2.31167
14029	YP	225	8	27.847	1.44478
14032	ZrP	225	8	116.97	2.06807
17076	YCd3	225	16	1.8879	0.275979
17224	TiGaFe2	225	16	32.017	1.50538
17278	ZrGaNi2	225	16	0.73798	-0.131955
17405	Li3Hg	225	16	2.0021	0.301486
17592	Li3Pb	225	16	3.1678	0.500758
17907	ScP	225	8	68.194	1.83375
18108	YSe	225	8	8.9326	0.950978
18356	LiGa2Ir	225	16	2.1579	0.334031
18383	LiIn2Pd	225	16	1.7438	0.241497
18705	AlVFe2	225	16	61.373	1.78798
21386	MgTe	225	8	3.0491	0.484172
22263	YC	225	8	17.618	1.24596
22373	Mn2AlV	225	16	33.175	1.52081
28054	InAs	225	8	1.827	0.261739
30173	VGaFe2	225	16	32.701	1.51456
30255	TiFe2Sn	225	16	20.653	1.31498
298139	SrMg3	225	16	1.0003	0.000130269
303383	CaMg3	225	16	2.288	0.359456
307910	Ta3V	225	16	7.2496	0.860314
307923	Li3As	225	16	2.6133	0.417189
308190	Li3Hg	225	16	1.967	0.293804
308281	Ta3Re	225	16	74.498	1.87214
308312	MnMo3	225	16	10.176	1.00758
308375	NaSr3	225	16	0.42207	-0.374616
308435	V3Ir	225	16	27.676	1.4421
308522	VMo3	225	16	51.094	1.70837
308589	KSr3	225	16	0.85302	-0.0690408
308672	SrMg3	225	16	0.99757	-0.00105662
308709	ReMo3	225	16	13.422	1.12782
308748	HfTa3	225	16	2.3549	0.371972
308802	Nb3Au	225	16	3.9699	0.59878
308836	Rb3Sr	225	16	0.38606	-0.413345
308959	Ta3Pt	225	16	9.2745	0.967291
308969	Ta3Nb	225	16	11.553	1.06269
308995	Na3Cd	225	16	0.32937	-0.482316
309074	V3Os	225	16	47.145	1.67344
309075	Cr3Re	225	16	27.806	1.44414
309145	Li3Al	225	16	3.4493	0.537731
309158	Li3Rh	225	16	4.838	0.684666
309205	Ba3Na	225	16	0.20888	-0.680103
309220	RbBa3	225	16	0.66986	-0.174016
309237	SrTl3	225	16	0.23624	-0.626647
309350	CsK3	225	16	0.11885	-0.925001
309421	Nb3Al	225	16	5.9322	0.773216
309490	Nb3Fe	225	16	39.441	1.59595
309531	Li3Sn	225	16	9.3373	0.970221
309605	Cs3Rb	225	16	0.18057	-0.743354
309610	TiMo3	225	16	41.834	1.62153
309647	TiRe3	225	16	24.294	1.3855
309867	Nb3Ir	225	16	16.91	1.22814
309887	Li3Ga	225	16	5.6208	0.749798
309897	VCr3	225	16	203.96	2.30955
310014	Li3P	225	16	4.7133	0.673325
310069	K3Li	225	16	0.15194	-0.818328
310099	Nb3Co	225	16	30.031	1.47757
310105	HfMo3	225	16	22.977	1.36129
310213	K3Ca	225	16	0.69798	-0.156157
310232	LiCa3	225	16	0.4828	-0.316233
310240	Ti3Ru	225	16	1.9795	0.296556
310264	ZrNb3	225	16	3.0559	0.485139
310307	Ta3Rh	225	16	25.29	1.40295
310367	Ta3Os	225	16	59.113	1.77168
310385	Sr3Li	225	16	0.23175	-0.63498
310426	BaSr3	225	16	1.8209	0.260286
310471	Mg3Sc	225	16	6.1095	0.786006
310505	YMg3	225	16	4.0742	0.610042
310531	MnNb3	225	16	31.317	1.49578
310639	Na3Al	225	16	0.79162	-0.101483
310669	Li3Pb	225	16	3.4221	0.534293
310680	V3Fe	225	16	107.24	2.03036
310700	K3Sr	225	16	0.31455	-0.50231
310741	Na3In	225	16	0.42283	-0.373834
310773	Nb3Re	225	16	29.403	1.46839
310824	Tl3Bi	225	16	0.20469	-0.688903
310866	Ta3Ti	225	16	4.8775	0.688197
310941	Cs3Ba	225	16	0.26999	-0.568652
310953	Zr3Ir	225	16	4.4205	0.645471
310958	KBa3	225	16	0.43977	-0.356774
311047	Li3In	225	16	4.5837	0.661216
311058	MnCr3	225	16	70.601	1.84881
311060	ZrMo3	225	16	31.455	1.49769
311072	YCd3	225	16	1.8957	0.27777
311103	Ta3Cr	225	16	12.831	1.10826
311138	Ta3Ir	225	16	26.198	1.41827
311237	Tl3Sn	225	16	0.31478	-0.501993
311310	Ca3Y	225	16	2.5295	0.403035
311313	Cs3Sr	225	16	0.16645	-0.778716
311317	TaMo3	225	16	37.939	1.57909
311384	CsBa3	225	16	0.92947	-0.0317646
311445	ZrTa3	225	16	2.4955	0.397158
311529	Nb3In	225	16	3.9047	0.591588
311571	Ba3Sr	225	16	1.5125	0.179695
311578	RbSr3	225	16	1.2187	0.0858968
311594	V3Re	225	16	39.336	1.59479
311621	BaMg3	225	16	1.2254	0.0882779
311626	Tl3Pb	225	16	0.44411	-0.352509
311736	Na3Mg	225	16	1.2619	0.101025
311768	Nb3Pd	225	16	8.1529	0.911312
311983	Na3Ca	225	16	0.37169	-0.429819
311999	NbMo3	225	16	76.206	1.88199
312049	NaCa3	225	16	1.1359	0.0553401
312103	Zr3Pb	225	16	1.5753	0.197363
312137	Li3Zn	225	16	3.5994	0.55623
312143	Li3Ge	225	16	5.4099	0.733189
312263	Li3Cu	225	16	1.0443	0.0188253
312293	Li3Cd	225	16	3.4631	0.539465
312437	AlV3	225	16	4.6717	0.669475
312488	Nb3Ru	225	16	50.566	1.70386
312492	Sr3Ca	225	16	1.3546	0.131811
312595	Nb3Os	225	16	33.61	1.52647
312647	Na3Pb	225	16	0.64698	-0.189109
312686	LiMg3	225	16	2.7931	0.446086
312739	K3Rb	225	16	0.2004	-0.698102
312763	ScCd3	225	16	3.1913	0.503968
312776	Li3Au	225	16	1.3289	0.123492
312878	NaTl3	225	16	0.16722	-0.776712
312920	AlMo3	225	16	11.604	1.06461
312955	Sr3Mg	225	16	0.19104	-0.718876
313012	Rb3Ba	225	16	0.21079	-0.67615
313047	TiNb3	225	16	6.4748	0.811226
313070	Ta3Ru	225	16	31.363	1.49642
313151	Ta3Mn	225	16	17.259	1.23702
313227	Rb3Na	225	16	0.054433	-1.26414
313311	Cr3Mo	225	16	52.916	1.72359
313331	CrMo3	225	16	36.935	1.56744
313362	Ca3Mg	225	16	0.9535	-0.0206793
313383	K3Na	225	16	0.18507	-0.732664
313432	Li3Ag	225	16	1.3131	0.118298
313494	Zr3Pt	225	16	5.4192	0.733935
313506	Nb3Pt	225	16	5.7269	0.75792
313517	Li3Tl	225	16	2.4525	0.389609
313528	NaLi3	225	16	1.1267	0.0518083
313529	ScMo3	225	16	19.4	1.2878
313580	Li3Mg	225	16	2.2709	0.356198
313585	LiZn3	225	16	1.8605	0.26963
313675	Na3Li	225	16	0.60716	-0.216697
313692	Ti3Ir	225	16	8.1206	0.909588
313799	BaCa3	225	16	1.3423	0.12785
313828	Cs3Na	225	16	0.03618	-1.44153
313883	Zr3Os	225	16	2.0429	0.310247
313925	CaMg3	225	16	2.3009	0.361898
313928	Ba3Ca	225	16	0.96661	-0.0147487
313939	K3Ba	225	16	0.24221	-0.615808
313993	Ba3Li	225	16	0.072788	-1.13794
314119	Ta3Mo	225	16	17.241	1.23656
314137	KNa3	225	16	0.18358	-0.736175
314189	KRb3	225	16	0.13584	-0.866972
314195	TaNb3	225	16	11.199	1.04918
314261	Ta3Au	225	16	5.1597	0.712624
314320	V3Ru	225	16	72.217	1.85864
314435	ScZn3	225	16	2.9313	0.46706
314444	SrCa3	225	16	1.6214	0.20989
314468	Ta3Pd	225	16	12.539	1.09826
314479	CsRb3	225	16	0.1491	-0.826522
314487	Li3Si	225	16	6.0502	0.78177
314518	Nb3Rh	225	16	24.298	1.38557
314555	Cs3K	225	16	0.073583	-1.13322
314639	NaMg3	225	16	2.7426	0.438162
314650	Na3Sn	225	16	0.70183	-0.153768
314853	HfNb3	225	16	2.8211	0.450418
314869	Li3Bi	225	16	2.7336	0.436735
314914	Ti3Os	225	16	3.1656	0.500456
325782	HRu	225	8	31.354	1.49629
325865	LiH	225	8	24.104	1.38209
326081	ScN	225	8	36.402	1.56113
326638	AlSe	225	8	3.0088	0.478393
326671	TiAs	225	8	10.085	1.00368
326837	YSb	225	8	35.535	1.55066
326993	SrTe	225	8	10.876	1.03647
327509	HfN	225	8	247.29	2.39321
327854	LiF	225	8	13.213	1.121
328122	HRh	225	8	3.3109	0.519946
328526	ZrB	225	8	154.47	2.18884
328549	CrC	225	8	2.2851	0.358905
328926	YAs	225	8	58.324	1.76585
361045	Sc2CdPt	225	16	0.854	-0.0685421
361376	Sc2TlAu	225	16	0.36738	-0.434884
361553	Sc2CdIr	225	16	4.9804	0.697264
361649	Sc2GaCo	225	16	2.4698	0.392662
361795	LiSc2Ge	225	16	8.3825	0.923374
361888	Sc2BeRh	225	16	5.375	0.730378
361988	Sc2TlZn	225	16	3.9307	0.59447
362149	Sc2SnRu	225	16	1.1113	0.0458313
362354	Sc2AlRu	225	16	6.6716	0.82423
362763	Sc2PbAu	225	16	0.25055	-0.601106
362908	Sc2OsAu	225	16	7.6109	0.881436
363031	Sc2AlIn	225	16	5.1707	0.713549
363110	Sc2CuPt	225	16	2.0996	0.322137
363742	CaHfPt2	225	16	0.41413	-0.382863
368364	HfSnOs2	225	16	28.203	1.4503
368386	MgSiOs2	225	16	28.785	1.45917
368791	ScVOs2	225	16	20.109	1.30339
368949	AlGaOs2	225	16	24.802	1.39449
368973	MgNbOs2	225	16	26.563	1.42428
369054	HfSiOs2	225	16	9.1339	0.960656
369203	ZrTiOs2	225	16	27.374	1.43734
369204	SiGeOs2	225	16	10.752	1.03149
369322	HfAlOs2	225	16	25.613	1.40846
369483	CrSiOs2	225	16	7.2385	0.859649
370325	ScMoOs2	225	16	17.154	1.23437
370389	TiVOs2	225	16	28.452	1.45411
370860	BaTl2In	225	16	0.38324	-0.416529
370866	SrTl2Pb	225	16	0.41839	-0.378419
370871	Tl2HgBi	225	16	0.68992	-0.161201
371126	SrMgTl2	225	16	0.95795	-0.0186572
371130	BaScTl2	225	16	0.39976	-0.398201
371132	CaTl2Cd	225	16	0.82661	-0.0826993
371517	CaTl2Ag	225	16	0.36092	-0.442589
371609	BaMgTl2	225	16	0.7204	-0.142426
371877	RbTl2Pb	225	16	0.14612	-0.83529
371966	LiYTl2	225	16	3.4189	0.533886
372026	KTl2Sn	225	16	0.43261	-0.363903
372049	BaTl2Sn	225	16	0.18287	-0.737858
372237	CaTl2In	225	16	0.56019	-0.251665
372778	LiTl2In	225	16	0.24752	-0.60639
373009	SrScTl2	225	16	0.94576	-0.0242191
373036	BaYTl2	225	16	0.48075	-0.318081
373139	RbTl2Bi	225	16	0.28873	-0.539508
373148	SrTl2In	225	16	0.42881	-0.367735
373239	NaTl2Cd	225	16	0.39162	-0.407135
373301	NaMgTl2	225	16	2.8551	0.455621
373306	NaTl2Sn	225	16	0.60478	-0.218403
375994	ReSi2Rh	225	16	11.708	1.06848
376641	Si2MoOs	225	16	2.4723	0.393101
377714	ReSi2Ru	225	16	8.5927	0.93413
377747	FeSi2Os	225	16	10.357	1.01523
379131	TiMoAs2	225	16	8.3748	0.922974
387763	VCr2Re	225	16	50.698	1.70499
388180	TaCr2Re	225	16	47.84	1.67979
391512	MnV2Re	225	16	74.811	1.87397
391546	V2MoRu	225	16	52.946	1.72383
391586	V2ReMo	225	16	47.979	1.68105
391709	V2CrRe	225	16	68.074	1.83298
391765	MnV2Mo	225	16	70.068	1.84552
391808	TaV2Rh	225	16	26.785	1.42789
391840	MnV2Fe	225	16	23.788	1.37636
392013	V2CrRu	225	16	92.599	1.96661
392382	MnV2Os	225	16	39.491	1.5965
392408	V2CrFe	225	16	147.13	2.1677
392435	MnV2Cr	225	16	270.62	2.43236
392626	MnV2Ru	225	16	39.313	1.59454
392641	TaV2Ru	225	16	33.689	1.52749
392746	V2ReOs	225	16	34.198	1.534
392832	V2FeRe	225	16	39.794	1.59982
392931	NbV2Ru	225	16	41.694	1.62007
392971	NbV2Os	225	16	29.002	1.46243
393047	V2ReRu	225	16	39.121	1.59241
393109	V2CrOs	225	16	57.886	1.76257
393292	TaV2Re	225	16	49.648	1.6959
393437	V2FeMo	225	16	62.611	1.79665
393548	TaV2Os	225	16	45.742	1.66032
393864	BaMg2In	225	16	2.0223	0.305846
394277	Mg2PdRh	225	16	43.599	1.63948
394520	Mg2RuAu	225	16	11.882	1.07489
394603	Mg2TlAu	225	16	0.47882	-0.319828
394649	Mg2IrPt	225	16	107.95	2.03322
394829	NaMg2Ir	225	16	3.271	0.514681
394891	Mg2AgIr	225	16	39.185	1.59312
394913	Mg2IrPd	225	16	36.738	1.56512
395608	Mg2NiPd	225	16	10.37	1.01578
395697	Mg2NiIr	225	16	9.0143	0.954932
396043	BaCaMg2	225	16	1.1583	0.0638211
396241	Mg2TlIn	225	16	0.44268	-0.35391
404578	ScZnCu2	225	16	0.98139	-0.00815837
404830	LiGaCu2	225	16	4.5186	0.655004
404998	MgScCu2	225	16	3.4157	0.53348
405467	ScInCu2	225	16	5.1817	0.714472
405574	YAlCu2	225	16	1.3161	0.119289
406476	LiCu2Si	225	16	32.578	1.51292
406511	LiAlCu2	225	16	19.692	1.29429
409227	Y2MgPd	225	16	0.37318	-0.428082
409326	Y2TlGa	225	16	1.9924	0.299377
409510	Y2TlAg	225	16	1.7125	0.233631
409635	LiY2Rh	225	16	9.5266	0.978938
409737	Y2HgPt	225	16	0.59683	-0.224149
409859	Y2BeCo	225	16	9.0837	0.958263
409873	Y2GeAu	225	16	0.4361	-0.360414
409950	Y2TlAu	225	16	0.35405	-0.450935
410006	Y2AlCu	225	16	0.46903	-0.328799
410031	Y2CdPd	225	16	0.48747	-0.312052
410257	Y2AlCo	225	16	0.76698	-0.115216
411180	Y2OsPd	225	16	9.9735	0.998848
411208	Y2BeIn	225	16	3.3273	0.522092
411233	Y2MgPt	225	16	0.34173	-0.466317
411517	Y2InIr	225	16	0.51034	-0.29214
411954	YHfCo2	225	16	2.3868	0.377816
412414	TiBeCo2	225	16	32.901	1.51721
412436	BeVCo2	225	16	16.207	1.2097
412617	BeAlCo2	225	16	51.874	1.71495
412956	LiTiCo2	225	16	28.524	1.45521
413529	ScAlCo2	225	16	25.736	1.41054
413805	MgAlCo2	225	16	14.401	1.15839
413908	ZrAlCo2	225	16	8.6302	0.936021
414336	Hf2ReRh	225	16	48.953	1.68978
414581	Hf2AgRh	225	16	0.16007	-0.79569
414612	Hf2BeOs	225	16	91.383	1.96087
414847	Hf2MnFe	225	16	36.754	1.5653
415040	Hf2BeRu	225	16	121.85	2.08583
415079	Hf2MgRe	225	16	16.053	1.20556
415164	Hf2NiOs	225	16	8.9031	0.949541
415314	Hf2BeRe	225	16	48.099	1.68214
415335	Hf2NbRe	225	16	2.3945	0.379215
415394	Hf2MnOs	225	16	27.885	1.44537
415507	Hf2IrRu	225	16	6.1924	0.791859
415641	Hf2MnRu	225	16	28.364	1.45277
415846	Hf2FeRe	225	16	29.09	1.46374
415888	Hf2VRe	225	16	4.4668	0.649997
416004	Hf2CdOs	225	16	1.2107	0.0830365
416059	Hf2ReRu	225	16	37.506	1.5741
416090	Hf2NiRu	225	16	4.1058	0.613398
416120	Hf2CrOs	225	16	24.197	1.38376
416184	Hf2ZnCu	225	16	1.5104	0.179092
416202	Hf2BeFe	225	16	73.574	1.86672
416307	Hf2TaRe	225	16	1.5591	0.192874
417037	Ba2AsAu	225	16	0.96058	-0.0174665
417120	Ba2AlHg	225	16	0.51288	-0.289984
417134	Ba2AgRh	225	16	0.49434	-0.305974
417147	Ba2AgPt	225	16	0.6416	-0.192736
417178	Ba2InAu	225	16	0.20853	-0.680831
417203	Ba2AlAu	225	16	0.25537	-0.59283
417278	Ba2TlPb	225	16	0.36144	-0.441964
417279	Ba2CdPt	225	16	0.29129	-0.535674
417335	Ba2LiPt	225	16	0.34656	-0.460222
417397	Ba2HgPt	225	16	0.44679	-0.349897
417436	Ba2LiAu	225	16	0.21782	-0.661902
417532	Ba2GeAu	225	16	0.3835	-0.416235
417566	Ba2TlPt	225	16	0.14899	-0.826843
417594	Ba2GaAu	225	16	0.38233	-0.417562
417608	Ba2TlAu	225	16	0.24733	-0.606723
417661	Ba2AgBi	225	16	1.3066	0.116143
417678	Ba2MgTl	225	16	0.57536	-0.24006
417689	Ba2CdPd	225	16	0.30722	-0.512551
417784	Ba2CdIr	225	16	0.21152	-0.674649
417843	Ba2HgRh	225	16	0.34828	-0.458071
417882	Ba2AgAs	225	16	1.0478	0.0202784
417899	Ba2AgIr	225	16	0.71286	-0.146996
417922	Ba2IrPd	225	16	0.54653	-0.262386
417940	Ba2AgPd	225	16	0.7632	-0.117362
417996	Ba2ZnPd	225	16	0.47789	-0.320672
418076	Ba2InHg	225	16	0.49018	-0.309644
418113	Ba2GaHg	225	16	0.57086	-0.24347
418145	Ba2ZnAu	225	16	0.48612	-0.313257
418158	Ba2CdPb	225	16	0.98918	-0.00472467
418173	Ba2SbAu	225	16	0.55479	-0.255871
418214	Ba2TlZn	225	16	0.76658	-0.115443
418228	Ba2GaPt	225	16	0.19333	-0.713701
418232	Ba2TlCd	225	16	0.80933	-0.0918744
418235	Ba2CuBi	225	16	1.0959	0.0397709
418263	Ba2SnAu	225	16	0.18705	-0.728042
418323	Ba2LiHg	225	16	0.29355	-0.532318
418408	Ba2CdBi	225	16	0.84035	-0.0755398
418421	Ba2AgPb	225	16	0.38849	-0.41062
418486	Ba2AgAu	225	16	0.58004	-0.236542
418537	Ba2MgHg	225	16	0.3699	-0.431916
418551	Ba2NaPb	225	16	0.75104	-0.124337
418684	Ba2ZnBi	225	16	0.69309	-0.15921
418702	Ba2ZnPt	225	16	0.42753	-0.369033
418724	Ba2SiAu	225	16	0.43926	-0.357278
418737	Ba2HgSb	225	16	0.51487	-0.288302
418778	Ba2SnHg	225	16	0.52683	-0.27833
418884	Ba2LiTl	225	16	0.30121	-0.521131
418912	Ba2NaHg	225	16	0.2377	-0.623971
418921	Ba2CdHg	225	16	0.63416	-0.197801
418928	Ba2HgPd	225	16	0.41176	-0.385356
418973	Ba2HgPb	225	16	0.54544	-0.263253
418996	Ba2PbAu	225	16	0.1743	-0.758703
419013	Ba2PdAu	225	16	0.90209	-0.0447501
419070	Ba2TlHg	225	16	0.60842	-0.215797
419136	Ba2RhAu	225	16	0.62382	-0.204941
419162	Ba2CdAu	225	16	0.29004	-0.537542
419171	Ba2AgGe	225	16	0.44103	-0.355532
419178	Ba2HgAu	225	16	0.49386	-0.306396
419210	Ba2PdPt	225	16	0.94343	-0.0252903
419280	Ba2LiBi	225	16	0.61494	-0.211167
419295	Ba2MgAu	225	16	0.14115	-0.850319
419344	Ba2CuPt	225	16	0.72499	-0.139668
419397	Ba2SiHg	225	16	0.60048	-0.221501
419853	LiGe2Rh	225	16	0.99744	-0.00111322
442802	Ca2InAu	225	16	0.65688	-0.182514
443191	Ca2TlPt	225	16	1.3911	0.143358
443521	Ca2AgIr	225	16	3.4986	0.543894
443800	Ca2SbAu	225	16	0.98892	-0.00483884
443849	LiCa2Ag	225	16	0.94801	-0.0231871
443861	Ca2TlCd	225	16	4.4083	0.644271
443877	Ca2ZnSn	225	16	2.7716	0.442731
443893	Ca2SnAu	225	16	0.44991	-0.346874
444191	Ca2AsPt	225	16	0.44873	-0.348015
444563	Ca2AlAg	225	16	1.15	0.0606978
444753	LiCa2Pd	225	16	1.1746	0.06989
445318	Li2AgRh	225	16	21.621	1.33488
445486	Li2ScGa	225	16	47.248	1.67438
445670	Li2CaTl	225	16	1.1436	0.0582741
446242	BaLi2Sn	225	16	1.0304	0.0130058
446402	Li2TlZn	225	16	0.745	-0.127844
446726	BaLi2Pb	225	16	1.0146	0.00629486
446753	Li2YSi	225	16	33.702	1.52766
446879	Li2InRh	225	16	1.3147	0.118827
447016	Li2CaMg	225	16	1.2443	0.0949251
447203	Li2ZrAl	225	16	61.503	1.7889
450201	MgVRh2	225	16	8.257	0.916822
450469	InRh2Au	225	16	4.7788	0.679319
450656	AlZnRh2	225	16	16.759	1.22425
450745	InGaRh2	225	16	2.3671	0.374217
450844	BeVRh2	225	16	6.2595	0.79654
450896	LiGaRh2	225	16	13.618	1.13411
450974	MgZrRh2	225	16	18.274	1.26183
451024	BeAlRh2	225	16	45.247	1.65559
451367	InHgRh2	225	16	6.4622	0.81038
451444	AgSnRh2	225	16	8.6104	0.935023
451647	AlCdRh2	225	16	5.8966	0.770602
451833	GaCuRh2	225	16	11.217	1.04988
451899	ScBeRh2	225	16	6.3041	0.799623
452095	LiVRh2	225	16	37.331	1.57207
452211	MgAlRh2	225	16	21.731	1.33708
452318	ZrCuRh2	225	16	4.384	0.641871
452469	SiNiRh2	225	16	1.6467	0.216614
452579	LiAlRh2	225	16	118.72	2.07452
453623	SrYIn2	225	16	1.8754	0.273094
454472	NaIn2Pt	225	16	1.7856	0.251784
458366	LiAsIr2	225	16	6.2781	0.797828
458387	CaHfIr2	225	16	30.576	1.48538
459199	ScInIr2	225	16	17.166	1.23467
459215	ZrCdIr2	225	16	12.174	1.08543
459690	LiScIr2	225	16	28.81	1.45954
460139	LiCrIr2	225	16	17.609	1.24573
460142	LiBeIr2	225	16	56.121	1.74913
460186	MgGaIr2	225	16	19.625	1.29281
460247	LiAlIr2	225	16	163.06	2.21235
463254	GaSiPd2	225	16	0.29767	-0.526265
463283	InPd2Pb	225	16	0.21579	-0.665969
463393	YZrPd2	225	16	0.30905	-0.509971
463629	ScTiPd2	225	16	0.32492	-0.488224
463647	CuAsPd2	225	16	0.19616	-0.70739
463937	BiTePd2	225	16	0.38004	-0.420171
468175	MgBiPd2	225	16	0.53843	-0.268871
468177	CdSbPd2	225	16	0.21512	-0.667319
468794	SrCaPd2	225	16	1.0067	0.00290007
468936	CaZnPd2	225	16	0.15569	-0.807739
471546	TaMn2V	225	16	53.846	1.73115
471738	TiMn2Cr	225	16	75.849	1.87995
471949	TiMn2Si	225	16	29.411	1.46851
472077	Mn2VSi	225	16	59.354	1.77345
472122	Mn2AlCr	225	16	25.546	1.40732
472144	TiMn2Mo	225	16	61.089	1.78596
472333	Mn2VGe	225	16	24.906	1.3963
472454	HfMn2Nb	225	16	33.582	1.52611
472994	Mn2VGa	225	16	15.501	1.19036
473127	HfMn2V	225	16	32.368	1.51012
473192	Mn2NbSi	225	16	28.222	1.45059
473374	TiMn2Nb	225	16	67.929	1.83206
473462	Mn2NbV	225	16	54.96	1.74005
473476	Mn2AlV	225	16	33.494	1.52497
473509	Mn2AlMo	225	16	28.132	1.4492
473603	Mn2NbGa	225	16	30.088	1.47839
473624	TiMn2V	225	16	100.45	2.00195
473826	TaMn2Nb	225	16	42.719	1.63062
474033	Mn2NbAl	225	16	27.229	1.43503
474046	HfTaMn2	225	16	45.282	1.65593
482034	SrMgZn2	225	16	0.70726	-0.150421
482140	Zn2CoPd	225	16	7.6807	0.885401
482231	YZn2In	225	16	1.0894	0.0371874
482471	Zn2PtRh	225	16	6.0656	0.782874
482521	BaMgZn2	225	16	0.35307	-0.452139
483110	ZrScZn2	225	16	6.1088	0.785956
483728	CaMgZn2	225	16	1.1711	0.068594
483945	BaCaZn2	225	16	0.84184	-0.0747704
484143	LiZn2Ni	225	16	10.674	1.02833
484185	Zn2PdRu	225	16	11.57	1.06333
484209	Zn2CoPt	225	16	6.0362	0.780764
486882	ScNb2Os	225	16	9.7842	0.990525
487119	Nb2VRu	225	16	45.627	1.65922
487334	MnNb2Mo	225	16	69.477	1.84184
487588	Nb2CrRu	225	16	39.797	1.59985
488190	TaNb2Al	225	16	4.0218	0.60442
488221	TaNb2Ru	225	16	37.047	1.56875
488417	Nb2VOs	225	16	39.541	1.59705
488687	Nb2CrOs	225	16	48.021	1.68143
488867	TaNb2Re	225	16	35.385	1.54882
492142	LiSn2Os	225	16	1.0628	0.0264515
492848	NaSn2Pd	225	16	0.70682	-0.150691
498705	CaRhPb2	225	16	0.10972	-0.959714
499143	LiMgPb2	225	16	2.1064	0.323541
499702	Be2AgRu	225	16	62.34	1.79477
499711	Be2CoRh	225	16	93.096	1.96893
499780	Be2CoNi	225	16	207.1	2.31618
499924	Be2AgRh	225	16	51.251	1.7097
499929	Be2FePd	225	16	29.102	1.46392
499974	Be2ZnCo	225	16	24.134	1.38263
500184	Be2ZnNi	225	16	23.8	1.37658
500500	Be2NiOs	225	16	36.5	1.56229
500558	Be2CuRu	225	16	51.883	1.71503
500637	HfZrBe2	225	16	27.67	1.44201
500646	Be2NiRh	225	16	74.059	1.86958
500683	Be2AgIr	225	16	19.125	1.2816
500702	Be2FeAu	225	16	57.434	1.75917
500829	Be2CoCu	225	16	108.36	2.03487
500896	Be2RePt	225	16	5.243	0.71958
501123	Be2FeNi	225	16	156.34	2.19407
501250	Be2FeRh	225	16	76.275	1.88238
501275	Be2AgAu	225	16	16.947	1.22909
501403	Be2NiPd	225	16	28.041	1.44779
501490	Be2NiIr	225	16	28.422	1.45365
501494	Be2RuRh	225	16	116.22	2.06528
501598	Be2CuNi	225	16	58.19	1.76485
501640	Be2OsPd	225	16	71.148	1.85216
501779	Be2OsRh	225	16	130.74	2.11641
501846	HfTiBe2	225	16	83.22	1.92023
501932	Be2OsAu	225	16	80.021	1.9032
501968	Be2CuRh	225	16	56.351	1.7509
502224	ScNbRu2	225	16	34.397	1.53652
502647	ScGaRu2	225	16	6.3111	0.800105
502708	ScVRu2	225	16	21.512	1.33268
502886	MgNbRu2	225	16	32.71	1.51468
502937	CrGaRu2	225	16	15.657	1.19471
503031	MgZrRu2	225	16	14.886	1.17278
503521	ZrBeRu2	225	16	7.7218	0.887719
503549	ZrScRu2	225	16	27.007	1.43148
503581	HfInRu2	225	16	12.959	1.11257
504046	TiNbRu2	225	16	7.0099	0.845712
504050	NbInRu2	225	16	17.73	1.24871
504212	AlGeRu2	225	16	8.9956	0.95403
504277	NbGaRu2	225	16	33.526	1.52538
504298	TiVRu2	225	16	19.452	1.28896
504591	ScGeRu2	225	16	10.419	1.01783
505909	YAg2Sn	225	16	0.88443	-0.0533365
506150	CaInAg2	225	16	0.3691	-0.432856
506255	LiZnAg2	225	16	2.4274	0.385141
507135	SrCaAg2	225	16	0.63081	-0.200101
507207	HfMgAg2	225	16	5.2151	0.717263
510146	Al2AgRh	225	16	3.7633	0.575569
510455	MnAl2Rh	225	16	13.12	1.11793
510501	Al2FeCo	225	16	30.41	1.48302
511127	Al2RePt	225	16	65.22	1.81438
511223	Al2ReIr	225	16	109.78	2.04052
511823	Al2CuNi	225	16	10.295	1.01263
512023	ScAl2Pd	225	16	0.40236	-0.395385
512158	Al2CoRu	225	16	22.507	1.35232
512345	Al2CuPd	225	16	4.2873	0.632184
512602	NaAlHg2	225	16	1.2994	0.113743
512705	SrMgHg2	225	16	0.5551	-0.255629
512880	BaHg2Bi	225	16	0.21255	-0.672539
512888	BaNaHg2	225	16	0.28851	-0.539839
512926	ScZnHg2	225	16	1.862	0.26998
513323	NaInHg2	225	16	0.77533	-0.110513
513614	KSnHg2	225	16	0.06475	-1.18876
513638	BaSnHg2	225	16	0.32564	-0.487262
513647	LiTiHg2	225	16	15.882	1.20091
513765	NaSrHg2	225	16	0.29795	-0.525857
513772	CaGaHg2	225	16	0.42612	-0.370468
513809	TlHg2Bi	225	16	0.17697	-0.7521
513907	NaCaHg2	225	16	0.69012	-0.161075
514116	BaHg2Pb	225	16	0.38115	-0.418904
514150	NaTlHg2	225	16	0.32441	-0.488906
514365	LiInHg2	225	16	0.35393	-0.451083
514619	BaYHg2	225	16	0.22772	-0.642599
514622	BaCaHg2	225	16	0.58744	-0.231036
514821	NaCdHg2	225	16	0.44971	-0.347067
514973	LiZrHg2	225	16	4.815	0.682596
515267	CaCdAu2	225	16	0.21118	-0.675347
515270	BeZnAu2	225	16	0.14899	-0.826843
515454	YInAu2	225	16	0.98747	-0.00547609
515477	ScZnAu2	225	16	3.8313	0.583346
515653	TiBeAu2	225	16	0.12944	-0.887931
515661	MgBeAu2	225	16	0.1669	-0.777544
515727	LiGaAu2	225	16	0.79058	-0.102054
515850	BeAlAu2	225	16	0.19286	-0.714758
515896	SrYAu2	225	16	0.45717	-0.339922
515965	YSbAu2	225	16	0.48979	-0.30999
515993	BiPbAu2	225	16	0.26844	-0.571153
516129	YSnAu2	225	16	1.1651	0.0663632
516293	BaSrAu2	225	16	0.62984	-0.20077
516373	CaInAu2	225	16	0.31387	-0.50325
516451	NaCaAu2	225	16	0.48634	-0.31306
516496	NaYAu2	225	16	2.6845	0.428863
516956	CaMgAu2	225	16	0.23709	-0.625087
517038	LiMgAu2	225	16	1.8463	0.266302
520380	CaCdGa2	225	16	0.58543	-0.232525
520534	LiGa2Rh	225	16	2.5707	0.410051
520979	NaInGa2	225	16	0.54949	-0.26004
521027	LiGa2Ru	225	16	3.8765	0.58844
521826	Ga2CoIr	225	16	2.857	0.45591
521896	CaGa2Ir	225	16	0.75073	-0.124516
522227	Ga2OsRh	225	16	5.4911	0.739659
522485	LiGa2Ni	225	16	9.7618	0.98953
522556	NaGa2Sn	225	16	0.26274	-0.580474
525231	ScNbFe2	225	16	29.798	1.47419
525286	HfFe2Sn	225	16	21.641	1.33528
525445	BeFe2Si	225	16	26.341	1.42063
525626	TiFe2Si	225	16	60.674	1.783
525672	TiGaFe2	225	16	31.195	1.49408
525679	BeCrFe2	225	16	53.699	1.72997
525903	BeVFe2	225	16	50.57	1.70389
526124	Fe2SiGe	225	16	9.8725	0.994427
526207	HfZrFe2	225	16	18.654	1.27077
526552	TiFe2Ge	225	16	40.241	1.60467
526680	VGaFe2	225	16	33.243	1.5217
526685	AlFe2Si	225	16	21.883	1.34011
526722	TiAlFe2	225	16	36.92	1.56726
527157	AlVFe2	225	16	60.312	1.7804
527284	NbGaFe2	225	16	44.703	1.65034
527590	TaBeFe2	225	16	49.679	1.69617
527713	NbAlFe2	225	16	39.694	1.59872
530089	LiBeNi2	225	16	52.15	1.71725
530195	LiAlNi2	225	16	36.546	1.56284
530536	Ta2MnRe	225	16	44.474	1.64811
530571	Ta2VRu	225	16	42.029	1.62355
530735	Ta2CrRe	225	16	46.504	1.66749
530950	Ta2TiRe	225	16	30.554	1.48507
531040	Ta2CrRu	225	16	39.306	1.59446
531383	Ta2VFe	225	16	45.852	1.66136
531439	Ta2CrFe	225	16	52.553	1.7206
531465	Ta2MnCr	225	16	68.281	1.8343
531555	Ta2TiIr	225	16	34.956	1.54352
531732	Ta2MnV	225	16	42.784	1.63128
531906	Ta2VRe	225	16	48	1.68124
532035	Ta2TiOs	225	16	42.346	1.62681
532135	Ta2CrOs	225	16	39.589	1.59757
532281	Ta2CrMo	225	16	43.049	1.63396
532469	Ta2FeMo	225	16	36.004	1.55635
532508	ZrTa2Ir	225	16	23.028	1.36226
532592	Ta2VIr	225	16	30.4	1.48287
532673	ZrTa2Os	225	16	24.701	1.39271
540567	ScNbRe2	225	16	24.001	1.38023
541258	VCrRe2	225	16	24.901	1.39622
541616	TaTiRe2	225	16	46.711	1.66942
541770	TaRe2Mo	225	16	31.202	1.49418
541861	TaAlRe2	225	16	23.948	1.37927
542099	HfRe2Mo	225	16	30.983	1.49112
542264	ScTaRe2	225	16	60.037	1.77842
542395	TiNbRe2	225	16	48.837	1.68875
542494	AlVRe2	225	16	19.224	1.28384
542527	AlRe2Mo	225	16	19.68	1.29403
542578	ScRe2Mo	225	16	27.022	1.43172
542640	TiVRe2	225	16	53.685	1.72985
542745	HfTiRe2	225	16	29.333	1.46736
543050	NbAlRe2	225	16	23.361	1.36849
543138	Sr2ZnPb	225	16	1.5231	0.182728
543180	Sr2InPd	225	16	0.17489	-0.757235
543276	NaSr2Al	225	16	1.14	0.0569049
543362	Sr2AlHg	225	16	1.0334	0.0142685
543421	Sr2InAu	225	16	0.41313	-0.383913
543444	Sr2AlAu	225	16	0.57518	-0.240196
543469	NaSr2Ag	225	16	0.41218	-0.384913
543583	Sr2LiPt	225	16	0.74692	-0.126726
543604	Sr2MgAg	225	16	0.44155	-0.35502
543682	Sr2LiAu	225	16	0.46567	-0.331922
543769	Sr2TlPd	225	16	0.39583	-0.402491
543779	Sr2GeAu	225	16	0.62359	-0.205101
543843	Sr2GaAu	225	16	0.63796	-0.195207
543881	Sr2AgHg	225	16	0.72981	-0.13679
543927	Sr2MgTl	225	16	0.87524	-0.0578728
543938	Sr2CdPd	225	16	0.54784	-0.261346
543971	NaSr2Pd	225	16	0.46679	-0.330878
544091	Sr2HgRh	225	16	0.53194	-0.274137
544147	Sr2AgIr	225	16	1.2667	0.102674
544324	Sr2InHg	225	16	0.73737	-0.132315
544335	NaSr2Sb	225	16	0.83496	-0.0783343
544396	Sr2ZnAu	225	16	0.59307	-0.226894
544401	Sr2AgSn	225	16	0.5155	-0.287771
544424	Sr2SbAu	225	16	0.93127	-0.0309244
544481	Sr2GaPt	225	16	0.42795	-0.368607
544512	Sr2AsPd	225	16	0.34303	-0.464668
544518	Sr2SnAu	225	16	0.33277	-0.477856
544577	Sr2LiHg	225	16	0.48199	-0.316962
544597	Sr2CuAu	225	16	0.73683	-0.132633
544735	Sr2AgAu	225	16	0.64439	-0.190851
544786	Sr2MgHg	225	16	0.56679	-0.246578
544800	NaSr2Pb	225	16	1.0739	0.0309638
544820	NaSr2Tl	225	16	0.58281	-0.234473
544870	NaSr2Pt	225	16	0.44529	-0.351357
545019	Sr2AgSb	225	16	1.2851	0.108937
545025	Sr2SnHg	225	16	0.9063	-0.042728
545159	NaSr2Hg	225	16	0.25424	-0.594756
545160	Sr2MgAl	225	16	0.9212	-0.0356461
545168	Sr2CdHg	225	16	0.789	-0.102923
545175	Sr2HgPd	225	16	0.62292	-0.205568
545226	Sr2GaPd	225	16	0.48319	-0.315882
545377	Sr2LiPd	225	16	0.7377	-0.13212
545408	Sr2CdAu	225	16	0.44619	-0.35048
545521	NaSr2Au	225	16	0.23154	-0.635374
545541	Sr2MgAu	225	16	0.25362	-0.595817
545589	Sr2CuPt	225	16	0.74934	-0.125321
546102	LiBi2Rh	225	16	1.2509	0.0972226
546143	LiBi2Pt	225	16	0.35878	-0.445172
546524	NaBi2Pd	225	16	19.961	1.30018
546637	NaBi2Ir	225	16	2.1696	0.33638
547948	NaBi2Rh	225	16	6.2191	0.793728
553609	SrMgCd2	225	16	0.64897	-0.187775
553813	LiCd2Pt	225	16	2.9958	0.476513
553922	KCd2Bi	225	16	0.25233	-0.598031
554448	LiYCd2	225	16	1.526	0.183555
554634	NaScCd2	225	16	3.6738	0.565116
555487	SrScCd2	225	16	0.75509	-0.122001
555946	Zr2CoRh	225	16	1.9778	0.296182
556249	Zr2CoAg	225	16	0.17676	-0.752616
556268	Zr2CoPd	225	16	0.26627	-0.574678
556341	Zr2MnPd	225	16	6.2149	0.793434
556429	Zr2MnFe	225	16	44.132	1.64475
556578	MgZr2Os	225	16	4.3983	0.643285
556606	Zr2CrRu	225	16	26.471	1.42277
556734	Zr2SbTe	225	16	7.2443	0.859996
557218	Zr2MnRu	225	16	31.506	1.49839
557363	Zr2FeNi	225	16	3.466	0.539829
557536	Zr2TaIr	225	16	12.668	1.10271
557577	Zr2GaMo	225	16	8.2194	0.91484
557638	Zr2ReRu	225	16	30.353	1.4822
557702	HfZr2Pt	225	16	4.4769	0.650977
557739	Zr2NbIn	225	16	5.9994	0.778108
557743	Zr2NbIr	225	16	13.552	1.132
557959	Zr2NbGa	225	16	6.7083	0.826612
558313	LiZr2Al	225	16	25.218	1.40171
561027	Ti2ReRh	225	16	40.311	1.60542
561069	HfTi2Sn	225	16	4.3752	0.640998
561150	Ti2MnGa	225	16	5.4395	0.735559
561224	Ti2CrCo	225	16	59.677	1.77581
561239	Ti2CrRh	225	16	42.663	1.63005
561272	Ti2FeRu	225	16	61.7	1.79029
561391	Ti2CoRe	225	16	41.865	1.62185
561534	Ti2MnFe	225	16	101.74	2.00749
561577	Ti2MnRh	225	16	58.842	1.76969
561609	Ti2BeMo	225	16	14.84	1.17143
561903	Ti2CuRu	225	16	5.1056	0.708047
562007	Ti2CoOs	225	16	24.2	1.38382
562076	Ti2MnOs	225	16	41.217	1.61508
562103	Ti2CrFe	225	16	43.209	1.63557
562151	Ti2VSb	225	16	3.6511	0.562424
562321	Ti2MnRu	225	16	57.634	1.76068
562336	Ti2ReIr	225	16	41.453	1.61756
562366	Ti2MnIr	225	16	41.364	1.61662
562439	Ti2ReOs	225	16	50.895	1.70668
562587	Ti2CrIr	225	16	34.803	1.54162
562741	Ti2ReRu	225	16	36.868	1.56665
562776	Ti2FeOs	225	16	43.727	1.64075
562850	Ti2CrNi	225	16	42.528	1.62867
563403	Ti2MnCo	225	16	85.586	1.9324
563409	Ti2OsRu	225	16	40.871	1.61142
642654	NaH	225	8	14.211	1.15262
646161	LiSiNi2	225	16	22.145	1.34528
646185	Li3Sb	225	16	2.417	0.383277
646222	ScSe	225	8	4.9135	0.691391
646223	YS	225	8	511.81	2.70911
647012	Li2CdGe	225	16	0.4758	-0.322576
647290	RbF	225	8	2.7291	0.436019
647326	MgSe	225	8	7.3136	0.864131
647475	TiInNi2	225	16	2.3977	0.379795
667869	InP	225	8	1.9243	0.284273
675175	Li3Sb	225	16	2.4264	0.384962
715978	LiZn3	225	16	2.1086	0.323994
716014	ScZn3	225	16	3.0459	0.483716
730086	LiZn2Ni	225	16	10.801	1.03346
730602	LiScZn2	225	16	3.9854	0.600472
732594	LiZn3	225	16	1.8338	0.263352
732630	ScZn3	225	16	3.0007	0.477223
748330	ScZn3	225	16	2.8519	0.455134
749040	LiZn3	225	16	2.2156	0.345491
1103688	NbB	225	8	1142	3.05767
1103698	YO	225	8	40.232	1.60457
1103799	CsAu	225	8	0.8747	-0.0581409
1103872	TiC	225	8	74.615	1.87283
1103913	VC	225	8	1767.2	3.24729
1103997	RbCl	225	8	1.8625	0.270096
1104004	ZrAs	225	8	32.197	1.50782
1104016	ZrSn	225	8	52.952	1.72388
1104038	SrPt	225	8	3.259	0.513084
1104109	BaPd	225	8	2.754	0.439964
1104118	CuSb	225	8	3.6576	0.563196
1104147	TiSi	225	8	78.889	1.89702
1104249	YH	225	8	11.456	1.05903
1104252	AlAs	225	8	5.5488	0.744199
1104282	AlN	225	8	72.237	1.85876
1104314	KF	225	8	6.6569	0.823272
1104335	GaSb	225	8	2.2644	0.354953
1104403	SrS	225	8	10.936	1.03886
1104408	GeBi	225	8	6.162	0.789722
1104488	AgBr	225	8	0.22205	-0.653549
1104530	BMo	225	8	79.159	1.8985
1104552	BaAu	225	8	3.7133	0.56976
1104590	KI	225	8	1.4676	0.166608
1104602	TlAu	225	8	1.0338	0.0144365
1104617	HfSi	225	8	118.99	2.07551
1104680	AgCl	225	8	0.26381	-0.578709
1104773	HfAs	225	8	1.7677	0.247409
1104844	HfGe	225	8	47.753	1.679
1104886	InI	225	8	0.90161	-0.0449813
1104906	InN	225	8	7.5037	0.875275
1104920	GaBr	225	8	0.446	-0.350665
1104949	SbPt	225	8	2.3208	0.365638
1105005	CsCl	225	8	1.229	0.0895519
1105039	RbAg	225	8	0.85097	-0.0700858
1105090	TlSe	225	8	0.74731	-0.126499
1105129	BaO	225	8	3.5271	0.547418
1105148	KAu	225	8	1.512	0.179552
1105177	BaAg	225	8	3.9621	0.597925
1105292	NaCl	225	8	7.5695	0.879067
1105325	TaB	225	8	904.98	2.95664
1105437	TiGe	225	8	63.894	1.80546
1105460	TlAs	225	8	0.9803	-0.008641
1105466	SiAs	225	8	4.2175	0.625055
1105507	GaI	225	8	1.0891	0.0370678
1105539	SnAu	225	8	2.6489	0.423066
1105629	KBr	225	8	2.692	0.430075
1105689	SrAg	225	8	1.9284	0.285197
1105698	MnH	225	8	2683.3	3.42867
1105735	SrAu	225	8	5.9729	0.776185
1105751	CaSe	225	8	15.739	1.19698
1105788	KAg	225	8	1.1997	0.0790727
1105828	CsHg	225	8	0.20232	-0.693961
1105854	AlP	225	8	9.4012	0.973183
1105895	HfP	225	8	315.45	2.49893
1105925	SiSb	225	8	4.7201	0.673951
1106032	TiP	225	8	84.523	1.92697
1106203	AlTe	225	8	5.3003	0.7243
1106242	GaTe	225	8	3.5227	0.546876
1106281	CsAg	225	8	1.1178	0.0483641
1106307	ZrPb	225	8	28.64	1.45697
1106321	TePb	225	8	1.5921	0.20197
1106355	FeH	225	8	314.87	2.49813
1106363	AgTe	225	8	1.1968	0.0780216
1106392	CrH	225	8	219.81	2.34205
1106420	SnSb	225	8	16.93	1.22866
1106426	CuTe	225	8	1.7886	0.252513
1106463	SrPd	225	8	1.7806	0.250566
1106486	SiP	225	8	20.788	1.31781
1106510	PbAu	225	8	1.8773	0.273534
1106516	BaPt	225	8	2.5526	0.406983
1106527	AgF	225	8	0.15573	-0.807628
1106615	BaH	225	8	2.9398	0.468318
1106628	TaH	225	8	20.9	1.32015
1106635	SnP	225	8	7.5493	0.877907
1106791	CoH	225	8	83.101	1.91961
1106808	VH	225	8	15.359	1.18636
1106844	SnAs	225	8	15.061	1.17785
1106847	BaCu	225	8	2.8785	0.459166
1106878	CsBr	225	8	1.4856	0.171902
1106917	ZnO	225	8	6.6319	0.821638
1106946	ZrSi	225	8	76.752	1.88509
1106958	CdO	225	8	7.5437	0.877584
1106960	AsPb	225	8	6.19	0.791691
1106961	ZrGe	225	8	67.256	1.82773
1107010	RbAu	225	8	0.80908	-0.0920085
1107016	BiPt	225	8	3.6336	0.560337
1209314	Cs2NaAlH6	225	40	5.9699	0.775967
1209420	Cs2RbAlF6	225	40	0.73625	-0.132975
1209421	Cs2KAlF6	225	40	1.3057	0.115843
1234981	MoH	225	8	71.338	1.85332
1234986	ScH	225	8	17.307	1.23822
1235046	TiN	225	8	98.923	1.9953
1235065	PPb	225	8	4.1462	0.61765
1288223	Cs2KAlF6	225	40	1.2874	0.109714
1288224	Cs2RbAlF6	225	40	0.72021	-0.142541
1364833	K2ZrTeO6	225	40	10.743	1.03113
1365091	Ba2CaSeO6	225	40	6.1217	0.786872
1365379	Cs2RbCoH6	225	40	0.95404	-0.0204334
1366187	Rb2NaAlH6	225	40	5.8007	0.76348
1367330	Ba2ScAuO6	225	40	5.0809	0.705941
1368245	Cs2RbAlH6	225	40	1.4462	0.160228
1369030	KRb2AlH6	225	40	0.73181	-0.135602
1369227	Ba2SrSeO6	225	40	3.1512	0.498476
1370196	Cs2KRhCl6	225	40	0.091552	-1.03833
1373213	K2HfTeO6	225	40	10.964	1.03997
1376008	Na2LiCoH6	225	40	8.3223	0.920243
1377290	KRb2CoH6	225	40	1.6684	0.2223
1377972	Cs2KAlH6	225	40	5.2289	0.71841
1428799	Cs2NaCoCl6	225	40	0.71919	-0.143156
1428878	Na2CuNiH6	225	40	6.9143	0.839748
1428881	Na2ZnCoH6	225	40	2.9233	0.465873
1428886	Na2LiNiH6	225	40	11.98	1.07846
1428894	Ca2CuH6Pt	225	40	3.3087	0.519657
1428897	Ca2H6PdRh	225	40	5.341	0.727623
1428899	Ca2NiH6Pt	225	40	3.1795	0.502359
1428900	Ca2H6IrRh	225	40	9.7258	0.987925
1428906	Ca2CoAgH6	225	40	2.3587	0.372673
1428908	Ca2NiH6Pt	225	40	3.1439	0.497469
1428909	Ca2H6PtAu	225	40	1.4712	0.167672
1428910	Ca2H6IrAu	225	40	0.69545	-0.157734
1428911	Ca2CoH6Au	225	40	0.95316	-0.0208342
1428921	LiCa2CoH6	225	40	20.454	1.31078
1428925	LiCa2MnH6	225	40	14.224	1.15302
1428939	Sr2CoAgH6	225	40	1.9272	0.284927
1428941	Sr2AgH6Ir	225	40	3.09	0.489958
1428953	Sr2NiH6Au	225	40	0.9905	-0.00414552
1428954	Sr2CoH6Au	225	40	1.2653	0.102194
1428955	Sr2H6IrAu	225	40	0.59627	-0.224557
1428967	Sr2LiCoH6	225	40	20.638	1.31467
1428983	K2NaH6Rh	225	40	5.9114	0.77169
1428989	K2TlH6Rh	225	40	0.88726	-0.0519491
1428999	Ba2NaCoH6	225	40	4.1915	0.622369
1429007	Ba2HgH6Rh	225	40	1.389	0.142702
1429019	Li2NiH6Pd	225	40	3.086	0.489396
1429130	K2HfTeO6	225	40	10.836	1.03487
1429131	K2MgIrO6	225	40	6.7158	0.827098
1429134	Rb2InOsO6	225	40	4.8107	0.682208
1429135	Rb2YOsO6	225	40	5.0768	0.70559
1429138	Rb2CaOsO6	225	40	3.8433	0.584704
1429141	Rb2OsPbO6	225	40	0.41804	-0.378782
1429144	Ba2YPdO6	225	40	4.08	0.61066
1429146	Ba2ZnPtO6	225	40	2.6742	0.427194
1429162	YTl2OsO6	225	40	2.9039	0.462982
1429164	Cs2YOsO6	225	40	2.8459	0.45422
1429165	Cs2CaOsO6	225	40	3.2967	0.518079
1430830	Cs2AgRhF6	225	40	1.0442	0.0187837
1430862	Cs2NaHgF6	225	40	0.62731	-0.202518
1431102	Cs2NaHgF6	225	40	0.61887	-0.208401
1431150	Na2CoH6Pd	225	40	4.5967	0.662446
1431198	Ca2CoH6Pd	225	40	2.9762	0.473662
1431201	Ca2H6IrPd	225	40	5.1929	0.71541
1431203	Ca2H6PdPt	225	40	5.3055	0.724726
1431207	Ca2CoH6Pt	225	40	1.9873	0.298263
1431208	Ca2H6IrPt	225	40	2.4527	0.389644
1431218	Sr2H6IrPd	225	40	1.3298	0.123786
1431219	Sr2H6PdRh	225	40	3.4022	0.53176
1431221	Sr2H6PdPt	225	40	3.2653	0.513923
1431245	Sr2CoNiH6	225	40	2.3605	0.373004
1431247	Sr2H6RhAu	225	40	1.1137	0.0467682
1431250	Sr2H6IrPt	225	40	0.61336	-0.212285
1431315	K2CdH6Rh	225	40	0.71808	-0.143827
1431428	Ba2AgH6Rh	225	40	1.6246	0.210746
1431444	Ba2H6RhAu	225	40	0.68082	-0.166968
1432196	Rb2NaCoCl6	225	40	0.10061	-0.997359
1432319	Rb2LiCoCl6	225	40	0.082414	-1.084
1432599	Cs2NaRhCl6	225	40	0.7731	-0.111764
1432636	Cs2KCoCl6	225	40	0.53351	-0.272857
1432730	Sr2H6IrPt	225	40	0.64463	-0.190689
1432732	Sr2H6PtRh	225	40	1.3188	0.120179
1432733	Sr2H6PtRh	225	40	1.2865	0.10941
1432734	Sr2H6IrRh	225	40	7.1873	0.856566
1433497	K2ScIrO6	225	40	6.3733	0.804364
1433505	K2YIrO6	225	40	7.1834	0.85633
1433507	K2YOsO6	225	40	6.9878	0.84434
1433510	K2YTeO6	225	40	6.8308	0.834472
1433514	K2HfOsO6	225	40	10.782	1.0327
1433584	K2ZrTaO6	225	40	5.3875	0.731387
1433586	K2ZrOsO6	225	40	8.8778	0.948305
1433587	K2ZrTeO6	225	40	10.993	1.04112
1433589	Rb2ScOsO6	225	40	3.7909	0.578742
1433591	Rb2MgOsO6	225	40	3.119	0.494015
4110	CsCl	221	2	0.69496	-0.15804
4111	CsBr	221	2	0.65198	-0.185766
4360	Mn3GaC	221	5	19.908	1.29903
5151	RbCl	221	2	1.0486	0.0206099
5995	KCl	221	2	1.9091	0.280829
7834	Pd3Pb	221	4	3.6818	0.56606
7918	Ti3AlC	221	5	20.094	1.30307
7921	Ti3InC	221	5	17.645	1.24662
7924	Ti3TlN	221	5	8.6024	0.93462
8080	SiOs	221	2	22.919	1.3602
8218	AlCo3C	221	5	8.7276	0.940895
8223	AlFe3C	221	5	23.633	1.37352
8233	Y3AlC	221	5	8.7426	0.941641
8355	CsI	221	2	0.89692	-0.0472463
8400	Sc3InB	221	5	7.935	0.899547
8402	ScBIr3	221	5	6.6344	0.821802
8443	Sc3BPb	221	5	8.8472	0.946806
8453	ScBRh3	221	5	11.249	1.05111
8457	YBRh3	221	5	18.842	1.27513
8467	Sc3SnB	221	5	11.574	1.06348
8468	Sc3TlB	221	5	5.1287	0.710007
8480	SiRu	221	2	18.606	1.26965
10074	KMgH3	221	5	10.458	1.01945
10118	InPt3	221	4	3.3507	0.525136
10122	FeIr3	221	4	16.133	1.20772
10152	Y3SnC	221	5	9.6204	0.983193
10155	Y3PbC	221	5	7.8094	0.892618
10411	AlCo	221	2	48.948	1.68973
10489	LiAl3	221	4	6.2985	0.799237
10516	AlNi	221	2	13.673	1.13586
10539	ScAl	221	2	14.014	1.14656
10576	AlRh	221	2	23.469	1.37049
10609	YAl	221	2	11.788	1.07144
10611	Y3Al	221	4	3.8188	0.581927
10614	YAl3	221	4	10.333	1.01423
10655	MgAg3	221	4	3.0929	0.490366
10664	AgPt3	221	4	5.3744	0.73033
10665	ScAg	221	2	5.6777	0.754172
10681	YAg	221	2	2.6735	0.42708
10711	CsAu	221	2	0.43736	-0.359161
10712	RbAu	221	2	0.37758	-0.422991
10769	LiAu3	221	4	1.809	0.257439
10777	MgAu	221	2	6.2678	0.797115
10797	ScAu	221	2	4.7286	0.674733
10822	YAu	221	2	2.3619	0.373262
10840	BaCd	221	2	1.9685	0.294135
10846	BaHg	221	2	1.0404	0.0172003
10867	BaZn	221	2	3.1033	0.491824
10900	BeRh	221	2	2960.3	3.47134
10906	TiBe	221	2	78.836	1.89672
10964	SrBi3	221	4	0.93034	-0.0313583
10972	CaCd	221	2	4.9323	0.693049
10986	CaHg	221	2	3.4308	0.535395
10991	CaIn	221	2	4.9172	0.691718
11000	CaPd	221	2	3.621	0.558829
11005	CaTl	221	2	6.8859	0.837961
11006	CaTl3	221	4	1.1337	0.0544981
11128	InPd	221	2	1.3127	0.118165
11153	InRh	221	2	9.9133	0.996218
11157	Sc3In	221	4	7.6809	0.885412
11175	YIn	221	2	4.8844	0.688811
11176	YIn3	221	4	3.6458	0.561793
11181	Zr3In	221	4	15.675	1.19521
11509	RbBr	221	2	1.2228	0.0873554
11510	RbI	221	2	0.72547	-0.139381
11511	KI	221	2	0.51774	-0.285888
11512	KBr	221	2	1.014	0.00603796
13662	Mn3SnN	221	5	16.657	1.2216
13666	Mn3ZnN	221	5	47.504	1.67673
13828	ZnFe3C	221	5	37.262	1.57127
13835	MgCo3C	221	5	25.525	1.40697
13837	ScCo3C	221	5	20.62	1.31429
13839	ZnCo3C	221	5	17.591	1.24529
13853	Fe3SnC	221	5	18.261	1.26152
13905	MgNi3C	221	5	2.0625	0.314394
13906	Mn3SnC	221	5	22.298	1.34827
13923	Sc3PbC	221	5	9.275	0.967314
13935	ZrRu3C	221	5	25.916	1.41357
13955	ScRh3C	221	5	4.2357	0.626925
13961	ScRu3C	221	5	23.078	1.3632
13966	Sc3SnC	221	5	14.704	1.16744
14592	Y3InC	221	5	9.3203	0.96943
15510	Mn3GaN	221	5	14.137	1.15036
15579	CsCaH3	221	5	6.4719	0.811032
16755	Sc3InN	221	5	17.034	1.23132
16829	Ti3SnH	221	5	6.077	0.783689
17032	Ca3PbO	221	5	4.9194	0.691912
17067	SrCd	221	2	1.5603	0.193208
17248	GaIr	221	2	6.0483	0.781633
17297	GaRu	221	2	9.4561	0.975712
17363	HfIr3	221	4	52.723	1.722
17380	HfOs	221	2	83.613	1.92227
17387	HfRh3	221	4	22.862	1.35911
17389	HfRu	221	2	38.123	1.58119
17404	LiHg	221	2	17.213	1.23586
17407	MgHg	221	2	4.0544	0.607927
17427	ScHg	221	2	9.0329	0.955827
17429	SrHg	221	2	1.7458	0.241994
17443	YHg	221	2	2.5146	0.400469
17450	ZrHg3	221	4	2.065	0.31492
17502	NbIr3	221	4	43.653	1.64001
17518	TaIr3	221	4	71.255	1.85282
17524	TiIr3	221	4	16.019	1.20464
17533	VIr3	221	4	15.83	1.19948
17536	YIr	221	2	12.866	1.10944
17544	ZrIr3	221	4	22.692	1.35587
17590	LiPb	221	2	6.5744	0.817856
17596	LiPd	221	2	22.672	1.35549
17610	LiTl	221	2	55.044	1.74071
17638	MgPd	221	2	32.584	1.513
17646	MgRh	221	2	103.22	2.01376
17655	SrMg	221	2	2.2023	0.342876
17660	MgTl	221	2	1.8392	0.264629
17663	YMg	221	2	18.629	1.27019
17700	MnV	221	2	884.6	2.94675
17728	NaPb3	221	4	2.521	0.401573
17747	NbRh3	221	4	54.479	1.73623
17752	NbRu3	221	4	24.149	1.3829
17759	NbZn3	221	4	11.81	1.07225
17795	ScNi	221	2	6.645	0.822495
17860	ZnNi	221	2	17.259	1.23702
17904	TiOs	221	2	52.777	1.72244
17906	ZrOs	221	2	44.909	1.65233
17915	Pt3Pb	221	4	1.6863	0.226935
17934	YPb3	221	4	0.80283	-0.0953764
17944	ScPd	221	2	4.2013	0.623384
17945	ScPd3	221	4	7.2985	0.863234
17954	SnPd3	221	4	3.8723	0.587969
17972	TiPd3	221	4	8.122	0.909663
17986	YPd3	221	4	7.5431	0.87755
17995	ScPt	221	2	2.1462	0.33167
17997	ScPt3	221	4	10.92	1.03822
18029	VPt3	221	4	4.1979	0.623032
18031	YPt3	221	4	8.339	0.921114
18037	ZnPt3	221	4	3.0573	0.485338
18039	ZrPt3	221	4	10.379	1.01616
18050	TiRe	221	2	64.703	1.81092
18054	ScRh	221	2	29.226	1.46577
18055	ScRh3	221	4	13.236	1.12176
18066	TaRh3	221	4	28.91	1.46105
18074	TiRh3	221	4	25.164	1.40078
18081	VRh3	221	4	27.623	1.44127
18083	YRh	221	2	15.532	1.19123
18089	ZrRh3	221	4	37.631	1.57555
18090	ScRu	221	2	25.666	1.40936
18097	TiRu	221	2	69.862	1.84424
18101	ZrRu	221	2	43.241	1.6359
18106	ScZn	221	2	7.9658	0.901229
18140	SrTl	221	2	1.7024	0.231062
18167	TiZn3	221	4	6.4989	0.81284
18172	YTl	221	2	3.2442	0.511108
18173	YTl3	221	4	1.8186	0.259737
18193	AlRu	221	2	41.638	1.61949
18197	Zr3Al	221	4	13.46	1.12905
18499	CoPt3	221	4	4.7079	0.672827
18674	ZnRh	221	2	15.511	1.19064
18716	ScAl3	221	4	34.975	1.54376
18741	ZnAu	221	2	0.62796	-0.202068
18782	CaPb3	221	4	4.2036	0.623621
18811	TiCo	221	2	5.3529	0.728589
18866	ScIr3	221	4	25.572	1.40776
18869	MgSc	221	2	10.297	1.01271
19409	Mn3ZnC	221	5	33.096	1.51978
19422	VOs	221	2	18.428	1.26548
19423	TiFe	221	2	140.09	2.14641
19681	MgPd3	221	4	5.4109	0.73327
20721	YCu	221	2	3.3094	0.519749
20929	AlFe	221	2	22.099	1.34437
21316	TiAl3	221	4	20.941	1.321
21805	CaNiH3	221	5	20.178	1.30488
22245	PdAu3	221	4	2.5763	0.410996
22246	Pd3Au	221	4	5.1927	0.715393
22410	CuPd	221	2	6.6923	0.825575
22530	MgAg	221	2	53.086	1.72498
23377	InNi3N	221	5	8.0164	0.903979
23378	InCo3N	221	5	1.751	0.243286
23395	InPd3	221	4	5.272	0.721975
23404	TlHPd3	221	5	2.44	0.38739
27136	CdCo3N	221	5	4.6415	0.666658
27137	CdNi3N	221	5	7.0832	0.85023
27631	Ag3Pt	221	4	3.3256	0.52187
27979	ZrAl3	221	4	10.387	1.01649
28662	BaTe	221	2	1.3075	0.116442
29029	ScCd	221	2	11.321	1.05388
29043	YCd	221	2	3.7619	0.575407
29359	HfCo	221	2	4.7747	0.678946
29468	ScCo	221	2	43.797	1.64144
29521	TiCo3	221	4	46.453	1.66701
29555	CrIr3	221	4	13.902	1.14308
29784	ScCu	221	2	4.7131	0.673307
30309	GaNi	221	2	2.7078	0.432617
30346	ScGa3	221	4	6.041	0.781109
30987	TiPt3	221	4	6.0539	0.782035
31121	YZn	221	2	5.9547	0.77486
31126	ZrZn	221	2	10.944	1.03918
31231	GaRh	221	2	7.7003	0.886508
31240	GaCo	221	2	28.641	1.45699
52046	CsBr	221	2	0.63943	-0.194207
52059	CsCl	221	2	0.73798	-0.131955
52061	CsI	221	2	0.81811	-0.0871883
53881	CsI	221	2	0.82675	-0.0826258
54708	AlFe	221	2	22.823	1.35837
54942	AlRu	221	2	42.105	1.62433
55028	MgAg	221	2	53.742	1.73031
55142	ZnAu	221	2	0.6677	-0.175419
55542	InPd	221	2	1.3356	0.125676
55558	InRh	221	2	9.8922	0.995293
56154	KCl	221	2	1.9128	0.28167
56986	RbCl	221	2	1.0433	0.0184092
57018	RbI	221	2	0.72938	-0.137046
57019	RbBr	221	2	1.1987	0.0787105
57020	RbCl	221	2	1.0413	0.0175759
57108	KI	221	2	0.53352	-0.272849
69843	SiRu	221	2	18.925	1.27704
74704	SiRu	221	2	18.511	1.26743
88025	ScCd	221	2	11.375	1.05595
88036	YCd	221	2	3.9457	0.596124
88346	GaCo	221	2	28.545	1.45553
88389	HfCo	221	2	4.9194	0.691912
88926	ScCu	221	2	4.8384	0.684702
88957	YCu	221	2	3.2767	0.515437
89397	TiFe	221	2	141.87	2.15189
89398	TiFe	221	2	143.03	2.15543
89558	GaNi	221	2	2.6708	0.426641
89616	GaRh	221	2	7.7863	0.891331
89859	MgHg	221	2	3.973	0.599119
90117	LiTl	221	2	56.755	1.754
90147	MgPd	221	2	32.15	1.50718
90586	TiOs	221	2	51.7	1.71349
90791	YRh	221	2	15.203	1.18193
91935	BaTe	221	2	1.3082	0.116674
94482	MgAg	221	2	55.45	1.7439
94574	TiRu	221	2	71.124	1.85202
94600	CsAu	221	2	0.44169	-0.354882
94913	AlNi	221	2	13.653	1.13523
94919	AlNi	221	2	13.85	1.14145
104098	MgSc	221	2	10.63	1.02653
104099	YMg	221	2	18.15	1.25888
105788	YMg	221	2	16.951	1.2292
110794	AlFe	221	2	22.614	1.35438
110795	AlFe	221	2	23.193	1.36536
116118	YAl	221	2	11.839	1.07332
116234	ZrRu	221	2	45.223	1.65536
116235	ZrZn	221	2	10.999	1.04135
304415	ScOs	221	2	29.672	1.47235
304431	YTe	221	2	4.7428	0.676035
304443	MgPd	221	2	32.154	1.50724
304457	SrHg	221	2	1.7681	0.247507
304462	ScCo	221	2	43.783	1.64131
304487	AlNi	221	2	13.808	1.14013
304501	InPd	221	2	1.3385	0.126618
304520	TiMn	221	2	81.001	1.90849
304528	AlRh	221	2	22.644	1.35495
304537	SrTl	221	2	1.7164	0.234619
304541	BeAu	221	2	3.0652	0.486459
304547	SrGa	221	2	0.90013	-0.0456948
304549	HfRu	221	2	38.099	1.58091
304604	CaPt	221	2	5.2498	0.720143
304613	CsAu	221	2	0.4221	-0.374585
304642	AlFe	221	2	22.56	1.35334
304675	YPd	221	2	2.4051	0.381133
304693	CsCd	221	2	0.048039	-1.31841
304702	VMo	221	2	69.351	1.84105
304710	BaHg	221	2	1.0575	0.0242804
304725	RbI	221	2	0.72846	-0.137594
304752	ScRh	221	2	29.134	1.4644
304756	TaCr	221	2	65.284	1.81481
304772	SrMg	221	2	2.1857	0.339591
304784	CaCd	221	2	4.9671	0.696103
304791	ReMo	221	2	14.154	1.15088
304811	RbCl	221	2	1.028	0.0119931
304819	TiRu	221	2	70.12	1.84584
304840	ZnCo	221	2	17.251	1.23681
304852	SrPt	221	2	1.9304	0.285647
304873	KCl	221	2	1.913	0.281715
304923	BaPd	221	2	1.0365	0.0155693
304927	MnSi	221	2	7.5182	0.876114
304973	BaCd	221	2	1.9588	0.29199
304995	ScGa	221	2	8.4453	0.926615
305022	BaNa	221	2	2.1354	0.329479
305043	YIn	221	2	4.8617	0.686788
305071	ScZn	221	2	7.7478	0.889178
305079	MgAg	221	2	52.935	1.72374
305087	BiPd	221	2	0.62172	-0.206405
305116	GaRu	221	2	10.307	1.01313
305120	ZnNi	221	2	17.207	1.23571
305170	ZrS	221	2	19.243	1.28427
305224	CsRb	221	2	0.14426	-0.840854
305238	CaTl	221	2	6.7275	0.827854
305241	TiRe	221	2	61.103	1.78606
305266	LiCd	221	2	22.063	1.34366
305296	TlPd	221	2	0.36894	-0.433044
305304	CaAg	221	2	2.293	0.360404
305306	TiBe	221	2	79.64	1.90113
305364	VCr	221	2	208.55	2.31921
305367	BaAu	221	2	1.0652	0.0274312
305405	KI	221	2	0.5266	-0.278519
305420	BaTe	221	2	1.3187	0.120146
305430	BaMg	221	2	2.8094	0.448614
305473	YAu	221	2	2.3585	0.372636
305476	CaHg	221	2	3.5033	0.544477
305519	ReSi	221	2	85.043	1.92964
305526	MgTl	221	2	1.7627	0.246178
305528	GeRu	221	2	17.939	1.2538
305530	MgZr	221	2	25.41	1.405
305539	CdPd	221	2	5.3173	0.725691
305540	LiCa	221	2	8.6212	0.935568
305541	YCu	221	2	3.1813	0.502605
305558	TiFe	221	2	145.24	2.16209
305575	YRu	221	2	17.274	1.23739
305598	YIr	221	2	12.725	1.10466
305605	RbBr	221	2	1.1388	0.0564475
305634	ScNi	221	2	6.664	0.823735
305652	ZrBi	221	2	1.501	0.176381
305655	MgSc	221	2	10.383	1.01632
305672	YMg	221	2	19.469	1.28934
305686	HfCd	221	2	6.5753	0.817916
305712	ZrRu	221	2	43.713	1.64061
305743	GaIr	221	2	5.8544	0.767482
305744	TiZn	221	2	14.606	1.16453
305754	LiPb	221	2	7.0143	0.845984
305766	YAg	221	2	2.7779	0.443717
305770	CaPd	221	2	3.647	0.561936
305771	KSr	221	2	0.40035	-0.39756
305799	GaCo	221	2	28.649	1.45711
305812	NbRe	221	2	92.82	1.96764
305820	CsCl	221	2	0.80368	-0.0949168
305842	YRh	221	2	15.323	1.18534
305854	RbAg	221	2	0.29198	-0.534647
305856	AlCo	221	2	50.654	1.70461
305874	ScRu	221	2	25.015	1.3982
305911	KBa	221	2	0.79133	-0.101642
305927	LiY	221	2	40.729	1.6099
305940	ZnIr	221	2	18.203	1.26014
305951	ZnPd	221	2	5.7994	0.763383
305962	ZrMo	221	2	9.6616	0.985049
305963	KAu	221	2	0.84824	-0.0714813
305968	YCd	221	2	4.0381	0.606177
305982	KH	221	2	5.9575	0.775064
305992	BaAg	221	2	1.3142	0.118661
306026	BaZn	221	2	3.0172	0.479604
306061	ZnRh	221	2	15.349	1.18608
306083	TaMo	221	2	48.836	1.68874
306131	BeRh	221	2	2865.1	3.45714
306170	HfSe	221	2	17.607	1.24569
306174	ZnAu	221	2	0.65767	-0.181992
306177	SiRu	221	2	19.021	1.27923
306201	FeSi	221	2	30.633	1.48619
306202	ZrCo	221	2	3.4071	0.532385
306217	BaSr	221	2	1.9737	0.295281
306236	NaSr	221	2	3.1482	0.498062
306248	CaGa	221	2	2.834	0.4524
306273	MnNb	221	2	129.01	2.11062
306310	ScIn	221	2	8.3483	0.921598
306331	CaIn	221	2	4.9731	0.696627
306333	ZrCd	221	2	7.6854	0.885666
306336	ZrZn	221	2	10.623	1.02625
306345	AsPd	221	2	1.0208	0.00894066
306355	MnV	221	2	855.33	2.93213
306369	RbH	221	2	3.9815	0.600047
306376	ZrTe	221	2	20.331	1.30816
306406	HfZn	221	2	8.6905	0.939045
306407	CaAu	221	2	2.7583	0.440641
306419	NbMo	221	2	99.148	1.99628
306433	LiHg	221	2	16.643	1.22123
306438	NaCa	221	2	1.7216	0.235932
306444	KBr	221	2	1.029	0.0124154
306451	MgCu	221	2	7.8848	0.896791
306457	YAl	221	2	12.322	1.09068
306479	MoAs	221	2	26.823	1.42851
306487	ZrSe	221	2	33.586	1.52616
306504	SrAg	221	2	1.0746	0.0312468
306510	SnRu	221	2	16.265	1.21125
306541	VOs	221	2	18.694	1.2717
306550	SrAu	221	2	1.3663	0.135546
306556	HfMo	221	2	7.6081	0.881276
306578	HfBi	221	2	1.1047	0.0432444
306582	ZrRe	221	2	32.984	1.5183
306589	VRe	221	2	73.519	1.8664
306593	GaNi	221	2	2.6774	0.427713
306630	CaRh	221	2	8.0095	0.903605
306643	CsHg	221	2	0.094967	-1.02243
306670	ScCu	221	2	4.5907	0.661879
306725	MgHg	221	2	3.7534	0.574425
306731	ZrHg	221	2	4.0577	0.60828
306773	TiOs	221	2	52.313	1.71861
306785	KRb	221	2	0.24778	-0.605934
306791	AlRu	221	2	43.808	1.64155
306795	ZrFe	221	2	47.172	1.67368
306797	ScCd	221	2	11.963	1.07784
306810	ScBe	221	2	11.751	1.07007
306851	ScAl	221	2	13.638	1.13475
306860	SiOs	221	2	22.01	1.34262
306863	SrLi	221	2	10.587	1.02477
306889	ScPt	221	2	2.0824	0.318564
306895	YNi	221	2	4.2259	0.625919
306905	YCo	221	2	15.73	1.19673
306922	InRh	221	2	9.8812	0.99481
306936	ZnPt	221	2	5.5114	0.741262
306990	HfFe	221	2	35.343	1.5483
306992	SrCd	221	2	1.5983	0.203658
306999	YTl	221	2	3.2761	0.515357
307047	LiIn	221	2	26.327	1.4204
307082	CrMo	221	2	79.66	1.90124
307086	ScTl	221	2	6.2931	0.798865
307096	CsAg	221	2	0.51836	-0.285369
307105	MgNi	221	2	14.119	1.1498
307106	CaMg	221	2	3.9223	0.593541
307112	KNa	221	2	0.21454	-0.668492
307120	ScAg	221	2	5.6561	0.752517
307128	YBe	221	2	7.3511	0.866352
307141	TaRe	221	2	193.91	2.2876
307146	GaRh	221	2	7.7432	0.88892
307171	SbMo	221	2	20.718	1.31635
307180	LiTl	221	2	57.893	1.76263
307185	NaLi	221	2	1.3527	0.131201
307187	SrZn	221	2	2.908	0.463594
307201	MgPt	221	2	44.442	1.64779
307213	LiMg	221	2	28.218	1.45053
307231	ZrSb	221	2	1.5974	0.203414
307238	HgPd	221	2	2.5411	0.405022
307278	SrPd	221	2	1.5102	0.179034
307282	HfMn	221	2	34.627	1.53941
307283	NbSb	221	2	14.602	1.16441
307305	GaPd	221	2	0.92171	-0.0354057
307313	TiCo	221	2	5.2267	0.718228
307320	HfOs	221	2	81.897	1.91327
307325	PbAu	221	2	0.30533	-0.515231
307331	BaPt	221	2	1.3218	0.121166
307352	ScPd	221	2	4.2108	0.624365
307355	CsNa	221	2	0.89589	-0.0477453
307401	BaCa	221	2	1.9501	0.290057
307408	BaI	221	2	3.8985	0.590898
307441	BaLi	221	2	2.0171	0.304727
307498	YZn	221	2	5.6897	0.755089
307508	LiPd	221	2	22.283	1.34797
307518	YGa	221	2	6.0445	0.78136
307523	HfHg	221	2	3.967	0.598462
307542	SrIn	221	2	1.3363	0.125904
307574	YHg	221	2	2.422	0.384174
307575	InIr	221	2	3.7631	0.575546
307592	MgRh	221	2	99.508	1.99786
307599	ZrOs	221	2	42.812	1.63157
307643	SrCa	221	2	2.0831	0.31871
307668	HfTe	221	2	18.264	1.2616
307672	CdRh	221	2	8.5076	0.929807
307693	CsBr	221	2	0.62922	-0.201197
307706	CsK	221	2	0.27382	-0.562535
307722	MgAu	221	2	6.2506	0.795922
307757	ScAu	221	2	4.6813	0.670366
307760	CsI	221	2	0.83467	-0.0784852
307768	CuPd	221	2	6.7608	0.829998
307781	ScHg	221	2	9.0835	0.958253
307825	RbAu	221	2	0.37697	-0.423693
307829	CaZn	221	2	2.6945	0.430478
307843	TaMn	221	2	71.173	1.85232
307860	YPt	221	2	2.1363	0.329662
307885	NbCr	221	2	100.82	2.00355
336091	HfRu	221	2	37.179	1.5703
336658	GaRu	221	2	9.8029	0.991355
337815	MnNb	221	2	131.37	2.1185
337986	KBr	221	2	1.0281	0.0120354
338021	MoAs	221	2	26.092	1.41651
338532	HfFe	221	2	35.01	1.54419
342943	KHg3	221	4	0.031964	-1.49534
342956	ScPd3	221	4	7.3591	0.866825
342957	Ag3Sb	221	4	1.1506	0.0609244
342996	MgPd3	221	4	5.6138	0.749257
343039	Ag3Pd	221	4	6.3358	0.801801
343107	InPd3	221	4	5.2574	0.720771
343130	YSc3	221	4	4.2672	0.630143
343143	ScAl3	221	4	35.454	1.54967
343200	SrTl3	221	4	0.35616	-0.448355
343215	Be3Au	221	4	7.423	0.870579
343352	HfH3	221	4	11.168	1.04798
343450	Al3Si	221	4	2.6888	0.429558
343462	CaSb3	221	4	0.68577	-0.163822
343463	VIr3	221	4	15.75	1.19728
343610	Hf3Pb	221	4	4.7551	0.67716
343615	MoRu3	221	4	42.027	1.62353
343649	Ir3Ru	221	4	60.476	1.78158
343669	TlPt3	221	4	2.5599	0.408223
343674	Os3Ru	221	4	71.659	1.85527
343698	MoIr3	221	4	36.524	1.56258
343736	AgPt3	221	4	5.3403	0.727566
343765	YMg3	221	4	4.3985	0.643305
343835	Zr3Sn	221	4	2.1776	0.337978
343840	ZrH3	221	4	12.979	1.11324
343874	Pt3Pb	221	4	1.6827	0.226007
343984	Mo3Pt	221	4	11.112	1.04579
344016	IrOs3	221	4	134.07	2.12733
344035	YPd3	221	4	7.6125	0.881527
344055	Pd3Pb	221	4	3.6808	0.565942
344073	FeIr3	221	4	16.887	1.22755
344102	VOs3	221	4	7.2772	0.861964
344119	SbAu3	221	4	0.14987	-0.824285
344136	CdPt3	221	4	4.4589	0.649228
344173	LiAl3	221	4	6.2477	0.79572
344191	ZrRh3	221	4	36.946	1.56757
344195	Zr3Ga	221	4	16.018	1.20461
344209	MgAu3	221	4	1.1185	0.048636
344210	BaBi3	221	4	0.20017	-0.698601
344237	MoPd3	221	4	7.1577	0.854773
344242	Ti3Ga	221	4	18.423	1.26536
344272	Y3In	221	4	4.5173	0.654879
344287	LiPt3	221	4	6.3868	0.805283
344331	NaAu3	221	4	2.75	0.439333
344337	Mg3Ag	221	4	2.0065	0.302439
344348	BiPd3	221	4	1.4743	0.168586
344378	Cs3K	221	4	0.14789	-0.830061
344421	HgPt3	221	4	3.0735	0.487633
344431	ScRh3	221	4	12.883	1.11002
344483	HfRh3	221	4	23.095	1.36352
344532	Li3Au	221	4	1.5979	0.20355
344617	CaAu3	221	4	0.22202	-0.653608
344619	ZnPt3	221	4	3.0646	0.486374
344625	TaCo3	221	4	31.79	1.50229
344633	CsRb3	221	4	0.14395	-0.841788
344664	CaTl3	221	4	1.1164	0.0478198
344751	Al3Ga	221	4	1.7998	0.255224
344798	Pd3Pt	221	4	5.692	0.755265
344817	Ti3Be	221	4	20.813	1.31833
344826	MoOs3	221	4	42.941	1.63287
344895	NbIr3	221	4	43.974	1.6432
344906	Be3Ni	221	4	16.022	1.20472
344915	LiGa3	221	4	1.9448	0.288875
344927	PtRh3	221	4	17.201	1.23555
344948	Be3Cr	221	4	53.083	1.72496
345008	Li3Ga	221	4	1.9446	0.28883
345077	VRh3	221	4	28.402	1.45335
345100	Hf3In	221	4	16.357	1.2137
345116	CaHg3	221	4	0.42408	-0.372552
345127	NbCo3	221	4	51.839	1.71466
345142	ScGa3	221	4	5.8422	0.766576
345157	IrPt3	221	4	8.3984	0.924197
345217	SrBi3	221	4	0.91315	-0.0394579
345239	MgZr3	221	4	12.256	1.08835
345258	CdPd3	221	4	7.2168	0.858345
345303	Pt3Au	221	4	4.7418	0.675943
345309	YPb3	221	4	0.81747	-0.0875282
345335	TaRh3	221	4	28.757	1.45874
345336	NaPd3	221	4	5.7036	0.756149
345376	HgAu3	221	4	0.5604	-0.251502
345395	TaOs3	221	4	32.78	1.51561
345416	Na3In	221	4	0.51539	-0.287864
345454	Ba3Sr	221	4	1.1167	0.0479365
345474	Zr3Ti	221	4	2.6792	0.428005
345500	TlPd3	221	4	3.1129	0.493165
345569	Hf3Cd	221	4	16.377	1.21423
345644	YIn3	221	4	3.7123	0.569643
345646	RuPt3	221	4	7.8234	0.893396
345669	InAu3	221	4	0.25942	-0.585997
345697	LiPb3	221	4	1.041	0.0174507
345706	Hf3Sn	221	4	5.5073	0.740939
345710	HfZr3	221	4	3.1087	0.492579
345727	CaPd3	221	4	4.3454	0.63803
345763	BiPb3	221	4	0.58545	-0.23251
345798	Hf3Al	221	4	24.034	1.38083
345877	IrPd3	221	4	7.4357	0.871322
345883	InPt3	221	4	3.4264	0.534838
345895	Zr3In	221	4	16.109	1.20707
345911	AgPd3	221	4	8.2151	0.914613
345981	ZrIr3	221	4	22.469	1.35158
346021	MgAl3	221	4	6.4222	0.807684
346090	Li3Rh	221	4	4.1284	0.615782
346166	TaIr3	221	4	72.721	1.86166
346226	ZrHg3	221	4	2.0621	0.31431
346259	Mo3Au	221	4	10.053	1.0023
346288	IrRu3	221	4	51.205	1.70931
346297	MoRh3	221	4	26.518	1.42354
346319	Y3Sc	221	4	4.0988	0.612657
346385	YAl3	221	4	9.9705	0.998717
346470	Be3Pd	221	4	12.635	1.10158
346526	Li3Pb	221	4	1.0748	0.0313277
346599	BaSr3	221	4	1.6388	0.214526
346614	Al3Zn	221	4	2.3354	0.368361
346623	Zr3Be	221	4	11.15	1.04727
346626	AlIr3	221	4	8.9609	0.952352
346655	MnBe3	221	4	15.251	1.1833
346693	Re3Ir	221	4	50.598	1.70413
346699	Zr3Sc	221	4	5.4743	0.738329
346766	Hf3Zn	221	4	10.706	1.02963
346767	Tl3Bi	221	4	0.47292	-0.325212
346793	Sc3In	221	4	7.6124	0.881522
346796	NbPd3	221	4	7.1779	0.855997
346806	Mg3Tl	221	4	1.3211	0.120936
346838	Zr3Cd	221	4	11.739	1.06963
346843	Zr3Zn	221	4	12.734	1.10496
346851	Sc3Tl	221	4	3.8166	0.581677
346903	RuRh3	221	4	68.222	1.83392
346928	Y3Zr	221	4	8.6173	0.935371
346932	ZrPd3	221	4	16.106	1.20699
346944	Zn3Mo	221	4	14.525	1.16212
347004	Re3Os	221	4	110.11	2.04183
347011	NaCa3	221	4	1.8539	0.268086
347045	CdAg3	221	4	3.0086	0.478364
347067	Li3Hg	221	4	1.7452	0.241845
347090	ZnAg3	221	4	1.4421	0.158995
347094	Be3Co	221	4	6.449	0.809492
347116	Y3Al	221	4	3.6641	0.563967
347185	Li3Pd	221	4	2.3284	0.367058
347186	Ti3Al	221	4	21.746	1.33738
347229	MgAg3	221	4	3.0803	0.488593
347231	MoPt3	221	4	4.514	0.654562
347321	LiCd3	221	4	1.1759	0.0703704
347327	Be3V	221	4	43.679	1.64027
347329	YHg3	221	4	0.81781	-0.0873476
347356	Mg3Pd	221	4	1.5153	0.180499
347404	CrIr3	221	4	13.896	1.14289
347473	MnIr3	221	4	15.118	1.17949
347481	ScPt3	221	4	11.292	1.05277
347491	AgAu3	221	4	1.6155	0.208307
347500	Ir3Pt	221	4	30.522	1.48461
347516	NbRu3	221	4	24.385	1.38712
347520	SrCa3	221	4	2.3641	0.373666
347523	Co3Mo	221	4	35.694	1.5526
347552	NiPt3	221	4	4.798	0.68106
347568	Li3Te	221	4	2.4159	0.383079
347585	MgGa3	221	4	0.82279	-0.084711
347623	NbOs3	221	4	12.242	1.08785
347637	Mg3Hg	221	4	1.4629	0.165215
347649	Zr3Hg	221	4	6.1604	0.789609
347675	NaPb3	221	4	2.9527	0.470219
347722	Li3Sn	221	4	1.3148	0.11886
347752	NaTl3	221	4	0.8592	-0.0659057
347767	KRb3	221	4	0.17318	-0.761502
347771	Mg3Pb	221	4	1.346	0.129045
347782	ReIr3	221	4	80.12	1.90374
347786	Na3Sn	221	4	0.44846	-0.348276
347798	CoIr3	221	4	13.224	1.12136
347804	LiAu3	221	4	1.7854	0.251736
347842	Mg3Bi	221	4	1.178	0.0711453
347843	NiPd3	221	4	5.7462	0.759381
347885	Mg3Sc	221	4	9.168	0.962275
347892	Sc3Al	221	4	9.4013	0.973188
347906	Na3Tl	221	4	0.4706	-0.327348
347912	PdAu3	221	4	2.5307	0.403241
347941	Li3Pt	221	4	1.9353	0.286748
347956	Zr3Tl	221	4	7.281	0.862191
347961	SnPd3	221	4	3.8587	0.586441
347993	CrOs3	221	4	8.5785	0.933411
348006	HfPt3	221	4	15.85	1.20003
348030	VCo3	221	4	75.079	1.87552
348040	RbBa3	221	4	0.87815	-0.0564313
348071	Ru3Rh	221	4	64.466	1.80933
348098	TaRu3	221	4	15.13	1.17984
348106	TiAl3	221	4	21.256	1.32748
348115	Ag3Bi	221	4	0.55765	-0.253638
348123	Hf3Mg	221	4	40.974	1.61251
348125	NbZn3	221	4	11.944	1.07715
348164	Mg3Zr	221	4	7.2324	0.859282
348189	Y3Tl	221	4	2.5323	0.403515
348244	CaBi3	221	4	1.6638	0.221101
348275	Li3In	221	4	1.6386	0.214473
348299	YTl3	221	4	1.83	0.262451
348338	MgIr3	221	4	15.851	1.20006
348348	ScTl3	221	4	0.914	-0.0390538
348368	ZrSc3	221	4	4.8887	0.689193
348372	Pt3Rh	221	4	6.042	0.781181
348375	VPd3	221	4	5.6936	0.755387
348390	CaMg3	221	4	2.6488	0.423049
348393	Li3Tl	221	4	1.3484	0.129819
348427	Zr3Pb	221	4	1.2342	0.0913855
348460	LiAg3	221	4	2.3523	0.371493
348522	ZrPt3	221	4	10.418	1.01778
348534	NbPt3	221	4	4.1768	0.620844
348570	Mo3Pd	221	4	10.881	1.03667
348581	MgPt3	221	4	6.8488	0.835614
348601	ZnPd3	221	4	3.4656	0.539778
348608	LiMg3	221	4	3.7465	0.573626
348611	Na3Hg	221	4	0.359	-0.444906
348615	ScIr3	221	4	24.539	1.38986
348617	Mg3Al	221	4	4.7278	0.674659
348650	HgPd3	221	4	4.0996	0.612741
348654	YGa3	221	4	3.4989	0.543932
348684	Al3Ag	221	4	1.0514	0.021768
348692	TiPd3	221	4	7.7958	0.891861
348702	HfAl3	221	4	7.5271	0.876628
348720	TiIr3	221	4	15.713	1.19626
348744	Hf3Hg	221	4	11.142	1.04696
348827	Ba3Ca	221	4	0.90809	-0.0418711
348854	Pd3Au	221	4	5.1854	0.714782
348859	Zr3Al	221	4	12.884	1.11005
348912	AlAg3	221	4	1.6591	0.219873
348923	Ru3Pt	221	4	33.677	1.52733
348931	YPt3	221	4	8.3411	0.921223
348953	Ca3Mg	221	4	1.5247	0.183184
348956	BaCa3	221	4	1.6519	0.217984
348967	KBa3	221	4	0.75858	-0.119999
348987	CaPb3	221	4	3.9755	0.599392
349011	Na3Pb	221	4	0.39326	-0.40532
349065	Ag3Hg	221	4	1.2743	0.105272
349072	Be3Nb	221	4	70.622	1.84894
349120	CaAl3	221	4	5.324	0.726238
349165	K3Na	221	4	0.1802	-0.744245
349171	LiPd3	221	4	5.1437	0.711276
349184	Be3Mo	221	4	51.607	1.71271
349187	TiRh3	221	4	25.952	1.41417
349189	CdAu3	221	4	0.84231	-0.074528
349217	K3Rb	221	4	0.24251	-0.61527
349220	HfPd3	221	4	12.039	1.08059
349348	VRu3	221	4	24.648	1.39178
349389	PdPt3	221	4	5.8114	0.764281
349391	HfIr3	221	4	56.033	1.74844
349401	Al3Ge	221	4	1.2905	0.110758
349422	IrRh3	221	4	33.243	1.5217
349430	Mg3Ga	221	4	1.8313	0.262759
349451	Ir3Rh	221	4	33.763	1.52844
349472	Sr3Ca	221	4	1.7786	0.250078
349504	Na3Cd	221	4	0.48049	-0.318316
349507	Cs3Rb	221	4	0.12674	-0.897086
349528	TaZn3	221	4	12.062	1.08142
349546	NbRh3	221	4	55.282	1.74258
349552	Hf3Ga	221	4	11.61	1.06483
349555	PtAu3	221	4	3.0635	0.486218
349556	OsRu3	221	4	45.066	1.65385
349574	Li3Bi	221	4	0.83274	-0.0794906
349575	Ag3Pt	221	4	3.3154	0.520536
349583	CsK3	221	4	0.16251	-0.78912
349593	Li3Al	221	4	1.3868	0.142014
349599	Be3Pt	221	4	7.1304	0.853114
349604	Pd3Rh	221	4	10.658	1.02768
349627	Mg3Au	221	4	1.7171	0.234796
349634	TiCo3	221	4	45.493	1.65794
349667	Na3Mg	221	4	1.6952	0.229221
349669	CoPt3	221	4	4.6411	0.666621
349685	ZrAl3	221	4	10.059	1.00255
349717	Li3Ir	221	4	3.977	0.599556
349719	CuPd3	221	4	6.5913	0.818971
349720	Cd3Rh	221	4	1.8385	0.264464
349726	TiPt3	221	4	5.9922	0.777586
349751	CuPt3	221	4	4.7532	0.676986
349769	Hf3Tl	221	4	13.69	1.1364
349809	Ti3Zn	221	4	16.722	1.22329
349862	NaHg3	221	4	0.96421	-0.0158284
349889	VPt3	221	4	4.1651	0.619625
349897	LiBi3	221	4	0.23066	-0.637028
349911	Ag3Au	221	4	2.0942	0.321018
349918	Ir3Os	221	4	127.03	2.10391
349973	SbRh3	221	4	10.38	1.0162
350071	RbSnO3	221	5	8.9747	0.95302
350160	RbYO3	221	5	2.6959	0.430704
350304	KSiO3	221	5	12.163	1.08504
350872	CsIrO3	221	5	3.7289	0.571581
350911	CsOsO3	221	5	9.2932	0.968165
351024	KInO3	221	5	3.5886	0.554925
351069	KRuO3	221	5	12.191	1.08604
351603	CsInO3	221	5	3.2336	0.509686
351750	CsReO3	221	5	11.816	1.07247
351827	RbInO3	221	5	4.4738	0.650677
352038	NaAlO3	221	5	13.475	1.12953
352344	CsYO3	221	5	3.7323	0.571977
352449	KSnO3	221	5	14.348	1.15679
352542	InReO3	221	5	8.1672	0.912073
352905	BaOsO3	221	5	5.262	0.721151
353000	SrAlO3	221	5	10.65	1.02735
353213	TlSbO3	221	5	5.1967	0.715728
353260	KAlO3	221	5	12.032	1.08034
353425	BaAlO3	221	5	7.6398	0.883082
353830	RbTlO3	221	5	1.7048	0.231673
353989	KZrO3	221	5	7.1171	0.852303
354102	RbOsO3	221	5	20.732	1.31664
354462	KZnO3	221	5	1.5684	0.195457
354554	KScO3	221	5	7.5937	0.880453
354632	KGaO3	221	5	5.3073	0.724874
354779	CsHfO3	221	5	6.7839	0.831479
355035	RbReO3	221	5	31.622	1.49999
355119	KReO3	221	5	32.913	1.51737
355189	CsBiO3	221	5	4.0446	0.606876
642659	CsCaH3	221	5	6.3292	0.801349
646450	Sc3AlC	221	5	23.97	1.37967
646451	Sc3GaC	221	5	14.94	1.17435
646452	Sc3InC	221	5	16.359	1.21376
646491	BaNbO3	221	5	9.725	0.98789
646820	Mg3In	221	4	1.614	0.207904
647109	Cr3GaN	221	5	33.943	1.53075
647118	Cr3SnN	221	5	31.583	1.49945
647294	TlI	221	2	0.076257	-1.11772
647683	TlI	221	2	0.077627	-1.10999
652102	BaLiH3	221	5	7.3619	0.86699
675158	TlI	221	2	0.071468	-1.14589
675307	Mg3In	221	4	1.607	0.206016
680773	KReO3	221	5	33.932	1.53061
681061	KAlO3	221	5	11.881	1.07485
681196	KGaO3	221	5	5.2533	0.720432
681204	KOsO3	221	5	18.939	1.27736
681962	SrAlO3	221	5	10.667	1.02804
682524	BaTaO3	221	5	15.722	1.19651
682681	KAlO3	221	5	11.916	1.07613
682704	BaAlO3	221	5	7.4468	0.87197
682853	RbReO3	221	5	31.435	1.49741
692332	BaNbO3	221	5	9.9551	0.998046
693138	CsReO3	221	5	11.887	1.07507
693527	KSiO3	221	5	12.591	1.10006
825436	BaAlO3	221	5	7.503	0.875235
825769	CsReO3	221	5	11.652	1.0664
826164	KAlO3	221	5	12.164	1.08508
826203	KSiO3	221	5	12.366	1.09223
826802	RbGaO3	221	5	3.1495	0.498242
826826	RbReO3	221	5	31.603	1.49973
826830	RbScO3	221	5	5.2404	0.719364
1218119	KF	221	2	2.8233	0.450757
1236342	KF	221	2	3.1682	0.500813
1250740	CsCaH3	221	5	6.5009	0.812973
1287219	Fe3SnN	221	5	4.4341	0.646805
1287221	Fe3SnN	221	5	4.5227	0.655398
3580	LiZnN	216	12	16.939	1.22889
4523	HgS	216	8	4.0403	0.606414
4566	SiC	216	8	470.57	2.67262
4656	InAs	216	8	29.342	1.46749
5664	BP	216	8	532.39	2.72623
5709	CdS	216	8	23.203	1.36554
6118	CdTe	216	8	9.1628	0.962028
6119	HgTe	216	8	8.1827	0.912897
7551	GaAs	216	8	39.143	1.59265
8057	BeAlB	216	12	25.099	1.39966
8235	BAs	216	8	2358.3	3.3726
10641	Li2InAg	216	16	2.6601	0.424898
10728	Li2GaAu	216	16	3.4129	0.533124
10747	Li2InAu	216	16	1.6755	0.224144
12376	AlAs	216	8	93.793	1.97217
14433	CoN	216	8	4.0642	0.608975
15032	NbSbRu	216	12	20.115	1.30352
17060	Na2CdPb	216	16	0.93987	-0.0269322
17353	ZnTe	216	8	33.483	1.52482
17880	Li2AlPd	216	16	6.6311	0.821586
18359	Li2GaPt	216	16	4.6522	0.667658
18508	Li2GaPd	216	16	5.1827	0.714556
18509	Li2GaIr	216	16	7.2728	0.861702
18536	TaSbRu	216	12	18.855	1.27543
20395	YN	216	8	49.215	1.6921
21813	Li2ZnGe	216	16	4.0428	0.606682
22473	GeC	216	8	260.29	2.41546
566130	HgBiPt	216	12	1.6832	0.226136
566143	ZnPtPb	216	12	0.81177	-0.090567
566156	SrHgPt	216	12	0.50504	-0.296674
566182	HfSnPt	216	12	15.298	1.18463
566186	InPdPt	216	12	1.6118	0.207311
566212	SrTlPt	216	12	0.18066	-0.743138
566245	TlGaPt	216	12	0.25546	-0.592677
566428	TlAgPt	216	12	2.8512	0.455028
566429	ZrSnPt	216	12	14.548	1.1628
566430	InPtAu	216	12	2.5529	0.407034
566504	TiInPt	216	12	2.792	0.445915
566505	CuSbPt	216	12	2.4951	0.397088
566507	PdPtPb	216	12	1.6762	0.224326
566525	TiSiPt	216	12	25.194	1.4013
566529	TlPtPb	216	12	1.3857	0.141669
566562	GaPtPb	216	12	0.43701	-0.359509
566605	CdGaPt	216	12	1.4367	0.157366
566673	SbPtPb	216	12	0.57209	-0.242536
566770	NaGaPt	216	12	1.5356	0.186278
566776	TlPdPt	216	12	1.461	0.16465
566861	TlPtAu	216	12	2.1104	0.324365
566873	HfSiPt	216	12	19.755	1.29568
566885	BeGePt	216	12	0.42439	-0.372235
566887	AgHgPt	216	12	1.2812	0.107617
566964	TaGaPt	216	12	27.383	1.43748
567030	HfGePt	216	12	16.146	1.20806
567220	KBaPt	216	12	1.257	0.0993353
567295	GaBiPt	216	12	0.34274	-0.465035
567341	LiSbPt	216	12	10.025	1.00108
567405	AgSnPt	216	12	3.0036	0.477642
567428	TaAlPt	216	12	51.692	1.71342
567451	TiGePt	216	12	21.134	1.32498
567474	TlZnPt	216	12	0.79534	-0.0994472
567556	CdGePt	216	12	0.23691	-0.625417
567585	AlSiPt	216	12	18.059	1.25669
567809	NaPtPb	216	12	29.628	1.4717
567827	NaTlPt	216	12	14.649	1.16581
567832	KRbPt	216	12	1.1167	0.0479365
567883	NaBiPt	216	12	35.275	1.54747
567938	ZnBiPt	216	12	1.2894	0.110388
568001	SrCdPt	216	12	0.30867	-0.510506
568026	AgSbPt	216	12	1.159	0.0640834
568052	TlSbPt	216	12	0.74135	-0.129977
568059	AlVPt	216	12	24.759	1.39373
568088	KNaPt	216	12	0.9495	-0.022505
568140	ZnCdPt	216	12	2.0837	0.318835
568172	CdHgPt	216	12	2.5406	0.404936
568184	NbGaPt	216	12	23.104	1.36369
568224	HgPtPb	216	12	1.7272	0.237343
568248	PtPbAu	216	12	1.1362	0.0554548
568255	BiPtAu	216	12	2.1056	0.323376
568323	TlHgPt	216	12	1.077	0.0322157
[truncated: 2,042 more rows]

## Sheet: LTC_Validation_359
OQMD_ID	Formula	Space_Group_Number	Number of Atoms	LTC_DFT (W/mK)	LTC_DFT_log_Value	LTC_Prediction (W/mK)	LTC_Prediction_log_Value
1543168	Cs2KRhCl6	225	40	0.07531	-1.12315	0.08759	-1.05755
1546761	Cs2TlRhBr6	225	40	0.080761	-1.0928	0.15325	-0.814598
1575138	Cs2AgOsBr6	225	40	0.085973	-1.06564	0.101046	-0.995482
1546965	Rb2LiIrCl6	225	40	0.0998	-1.00087	0.208251	-0.681412
1543122	Rb2NaCoCl6	225	40	0.10307	-0.986868	0.101897	-0.991838
1575778	Cs2KIrCl6	225	40	0.10956	-0.960348	0.119313	-0.923312
1549349	Cs2KRuCl6	225	40	0.11673	-0.932818	0.145623	-0.836771
1720380	Cs2KIrCl6	225	40	0.12387	-0.907034	0.111908	-0.951138
1575133	Cs2AlAgBr6	225	40	0.14574	-0.836421	0.152679	-0.816219
1432641	Cs2KAlCl6	225	4	0.19943	-0.70021	0.297246	-0.526884
1575131	Cs2InRhBr6	225	40	0.21823	-0.661086	0.129039	-0.889277
1432305	Rb2LiAlCl6	225	40	0.24547	-0.610002	0.245819	-0.609385
1720995	Rb2LiAlCl6	225	40	0.24729	-0.606793	0.241286	-0.617467
1549329	Cs2HgPtCl6	225	40	0.28945	-0.538426	0.0904881	-1.04341
1543163	Cs2NaHfCl6	225	4	0.36186	-0.441459	0.60638	-0.217255
1368340	Cs2NaCdF6	225	40	0.38094	-0.419143	0.126091	-0.899317
1432574	Cs2AgRhCl6	225	4	0.45455	-0.342418	0.435803	-0.36071
1721624	Cs2InIrCl6	225	40	0.56296	-0.249522	0.125168	-0.902505
1575765	Cs2InRhCl6	225	40	0.73938	-0.131132	0.146306	-0.834739
1261041	Ba2HfAlS6	225	4	0.98663	-0.00584568	2.04575	0.310853
1710866	K2NaAlF6	225	4	1.7611	0.245784	1.05276	0.0223284
1717400	Ba2AlAsO6	225	4	2.0649	0.314899	6.78725	0.831694
1431270	K2HfVH6	225	4	4.1709	0.62023	8.8314	0.946029
10522	ScAlNi2	225	3	4.6399	0.666509	3.7912	0.578777
1667672	Ca2H6PdPt	225	4	5.4968	0.74011	3.5505	0.550289
583421	KNaAs	216	12	0.084631	-1.07247	0.868344	-0.0613084
898037	RbNaPd	216	12	0.16753	-0.775907	0.54254	-0.265568
582669	CsSrAs	216	12	0.27344	-0.563138	0.823296	-0.0844443
974579	RbSrSb	216	12	0.33421	-0.475981	0.956646	-0.0192486
845822	KNaTe	216	12	0.64015	-0.193718	0.580043	-0.236539
582697	CsBaAs	216	12	0.65192	-0.185806	0.867489	-0.0617361
893660	CsBaIr	216	12	0.89748	-0.0469752	1.03794	0.0161718
581772	RbSrAs	216	12	1.1911	0.0759482	1.00171	0.000743583
845566	KRbTe	216	12	1.2102	0.0828571	0.569902	-0.244199
868156	BaSrGe	216	12	1.3099	0.117238	1.306	0.115943
915869	BaNaSb	216	12	1.3772	0.138997	1.22774	0.0891063
942854	AlHgSb	216	12	1.5085	0.178545	0.781972	-0.106809
581906	RbBaAs	216	12	1.6148	0.208119	0.845047	-0.0731192
581901	BaNaAs	216	12	1.9197	0.283233	1.5361	0.186419
582556	KBaAs	216	12	2.2773	0.35742	1.02184	0.0093843
580205	BaSrSi	216	12	2.5575	0.407816	1.66071	0.220293
892874	BaNaIr	216	12	4.6224	0.664868	2.62041	0.418368
925506	LiAlSn	216	12	7.8762	0.896317	4.6309	0.665665
1121713	VCr2Ru	216	16	10.281	1.01204	71.4688	1.85412
1112940	VCr2Fe	216	16	18.636	1.27035	125.336	2.09808
1114682	MnNbCr2	216	16	33.228	1.5215	67.9346	1.83209
1113850	MnNbMo2	216	16	43.585	1.63934	69.2286	1.84029
1112928	TiCr2Fe	216	16	48.271	1.68369	68.3261	1.83459
1112275	V2CrFe	216	16	57.45	1.75929	94.9147	1.97733
1121728	VCr2Mo	216	16	57.609	1.76049	87.9783	1.94438
1114686	TiMnCr2	216	16	62.499	1.79587	79.4447	1.90006
1114698	MnVCr2	216	16	207.17	2.31633	173.016	2.23809
1224413	CsAg	194	4	0.611327	-0.213727	0.699841	-0.155001
1748450	TlCuTe	194	6	0.873863	-0.0585565	0.678224	-0.168627
1514599	TlCuSe	194	6	0.877367	-0.0568189	1.05582	0.023589
1732445	KCdSb	194	6	0.89869	-0.0463901	0.642014	-0.192456
2760	KHgAs	194	6	0.917883	-0.0372125	0.664645	-0.17741
1387348	KAgSe	194	6	1.04826	0.020469	0.908145	-0.041845
1447626	KTeAu	194	6	1.06223	0.0262186	0.469262	-0.328585
1361767	CsAgS	194	6	1.20815	0.0821221	1.17111	0.0685993
1371501	KAgTe	194	6	1.2318	0.0905414	1.17207	0.0689533
1742608	KMgSb	194	6	1.3265	0.122707	1.52502	0.183276
1382774	RbAgSe	194	6	1.34314	0.12812	1.14396	0.0584098
1283273	RbZnBi	194	6	1.35849	0.133056	0.780269	-0.107755
1474173	CsBr	194	4	1.36347	0.134645	0.964786	-0.0155691
1348626	RbAgS	194	6	1.41959	0.152164	1.13841	0.0562998
1448229	CaAgP	194	6	1.72897	0.237787	1.61043	0.206943
1441519	CsCuSe	194	6	1.73143	0.238406	1.07719	0.0322905
1283314	NaZnAs	194	6	1.80938	0.25753	2.32974	0.367308
1283253	NaCuTe	194	6	1.94162	0.288163	1.13272	0.0541242
1742597	KMgAs	194	6	2.04253	0.310169	2.0355	0.308672
1441518	RbCuSe	194	6	2.50733	0.399212	1.3402	0.12717
1529815	RbCuTe	194	6	2.5284	0.402846	1.18849	0.0749971
1283315	KZnSb	194	6	2.59312	0.413823	1.72858	0.237689
1517340	KCuTe	194	6	2.62121	0.418501	1.46551	0.165988
1448789	KCuSe	194	6	2.71007	0.43298	2.02494	0.306413
1517863	BaAgAs	194	6	2.74663	0.438801	0.91352	-0.0392819
1441517	RbCuS	194	6	2.75033	0.439385	2.22062	0.346473
1517862	BaAgSb	194	6	2.79723	0.446729	1.03048	0.0130413
26331	BaLiP	194	6	2.81277	0.449134	2.34363	0.369889
1472954	RbF	194	4	2.93837	0.468106	1.59498	0.202755
1283249	BaLiAs	194	6	3.0987	0.49118	2.09112	0.320379
1455549	SrLiP	194	6	3.3974	0.531147	2.37246	0.375199
1283266	RbLiSe	194	6	3.4442	0.537088	1.14968	0.0605781
1438265	BaAgP	194	6	3.8556	0.586092	0.962867	-0.0164335
1444663	SrAgP	194	6	4.16917	0.620049	0.886089	-0.0525228
1283383	BaLiBi	194	6	4.21857	0.625165	1.46101	0.164654
1283203	NaZnP	194	6	4.24557	0.627936	2.85979	0.456334
1370912	RbZnP	194	6	4.365	0.639984	2.68887	0.429569
1740071	KCdP	194	6	4.50197	0.653402	0.947392	-0.0234705
1283330	SrLiAs	194	6	5.0877	0.706521	2.22806	0.347927
1283385	KLiSe	194	6	5.34733	0.728137	1.95261	0.290615
1455061	BaLiSb	194	6	5.52183	0.742083	1.97526	0.295625
1448467	KZnP	194	6	7.29153	0.862819	3.46885	0.540185
1283312	NaBeSb	194	6	7.9778	0.901883	9.14198	0.96104
1283186	KBeBi	194	6	8.5628	0.932616	4.82135	0.683169
1482929	KGaSi	194	6	10.1115	1.00481	1.40553	0.14784
40051	Al5C3N	194	18	12.9017	1.11065	41.9982	1.62323
1283357	KBeSb	194	6	13.0236	1.11473	6.56872	0.817481
20396	YN	194	4	41.8153	1.62134	23.9765	1.37979
1474172	AlN	194	4	54.0843	1.73307	60.0027	1.77817
2091	BaCl2	189	9	0.24119	-0.617641	1.06348	0.0267307
1366365	KBaSb	189	9	0.56726	-0.246218	0.857894	-0.0665664
1445903	CaSbPt	189	9	0.599913	-0.221911	0.787483	-0.103759
1479707	KRbS	189	9	0.63431	-0.197698	0.521998	-0.282331
1738677	CaCuAs	189	9	0.66217	-0.17903	1.45205	0.161981
1446768	SrAgSb	189	9	0.6907	-0.160711	0.742553	-0.129273
1446474	KNaTe	189	9	0.755897	-0.121538	0.422296	-0.374383
1445577	CaPtPb	189	9	0.790103	-0.102316	0.995915	-0.00177773
1376579	BaNaAs	189	9	0.800403	-0.0966911	0.928535	-0.0322019
1446801	CaCuP	189	9	0.828567	-0.0816725	1.75886	0.245232
1440434	BaF2	189	9	0.85682	-0.0671104	1.23241	0.0907545
1362439	SrAgP	189	9	0.876773	-0.0571127	1.13786	0.0560906
1446746	BaCaGe	189	9	0.933547	-0.029864	0.994669	-0.0023212
1446178	KNaS	189	9	1.01107	0.00477979	0.738524	-0.131635
1375272	CaAgSb	189	9	1.21757	0.0854927	0.878698	-0.0561603
1456271	SrCaGe	189	9	1.33343	0.124971	1.27592	0.105825
1373961	BaNaSb	189	9	1.47823	0.169743	1.14982	0.0606312
24717	BaNaP	189	9	1.58397	0.199746	1.39043	0.143151
25867	BaNaBi	189	9	1.62743	0.211503	1.34494	0.128703
1456001	NaLiTe	189	9	1.62803	0.211663	1.2556	0.0988507
1456225	SrCaSi	189	9	1.70427	0.231538	1.59379	0.202432
1385208	NaCaAs	189	9	1.8659	0.270888	1.54491	0.188904
1455902	SrLiBi	189	9	1.95437	0.291006	1.09149	0.038018
26328	NaSrP	189	9	2.14903	0.332243	1.5755	0.197418
1456391	SrLiP	189	9	2.1632	0.335097	2.05097	0.311958
24739	NaSrAs	189	9	2.1762	0.337699	1.22536	0.0882641
1365029	NaSrSb	189	9	2.22637	0.347597	0.99919	-0.000351856
1446764	CaAgP	189	9	2.26787	0.355618	0.969324	-0.0135308
1745662	NaCaP	189	9	2.4444	0.388172	1.54142	0.187922
1455838	SrMgSi	189	9	2.57713	0.411137	1.06698	0.0281574
1479719	SrLiAs	189	9	2.70717	0.432515	1.56509	0.19454
1455877	SrLiSb	189	9	3.006	0.477989	1.68989	0.227859
1445623	YSnPt	189	9	3.1065	0.492271	0.709849	-0.148834
1456535	LiCaSb	189	9	3.81733	0.58176	3.14411	0.497498
1445984	YSnPd	189	9	4.15923	0.619013	0.672612	-0.172236
1753098	LiCaP	189	9	5.01487	0.700259	2.21498	0.34537
1753099	LiCaAs	189	9	5.26757	0.72161	2.2712	0.356255
1446387	CaMgSi	189	9	5.34593	0.728024	2.17304	0.337069
1468129	KRbS	186	6	0.893423	-0.0489427	0.486713	-0.312727
1468140	SrLiAs	186	6	1.94207	0.288264	2.05838	0.313526
1474048	KF	186	4	12.8551	1.10907	3.15029	0.498351
1277969	BAs	186	4	1899.03	3.27853	64.8023	1.81159
20521	Cs4PbBr6	167	22	0.1038	-0.983803	0.142936	-0.844859
56308	Rb4CdBr6	167	22	0.136613	-0.864507	0.12186	-0.914138
1744678	SrPtO2	166	4	0.0532267	-1.27387	3.18668	0.503338
1371229	RbHF2	166	4	0.678607	-0.168382	1.65443	0.218649
1647201	Ba2SO	166	4	0.843183	-0.074078	1.80193	0.255738
24066	Ba2NF	166	4	1.16168	0.0650865	2.00489	0.302091
24068	Ba2BrN	166	4	1.22983	0.0898439	1.59282	0.202166
643222	Ba2NCl	166	4	1.35301	0.1313	1.67647	0.224395
1387970	Ba3Cr4O9	166	16	2.1236	0.327073	2.53337	0.403699
23004	Sr2IN	166	4	2.4989	0.397749	2.45302	0.389701
1348740	Sr2NF	166	4	3.24153	0.51075	4.43362	0.646759
21918	Sr2BrN	166	4	3.3937	0.530673	2.80925	0.448591
1731340	Ca2IN	166	4	3.52847	0.547586	5.07175	0.705158
1383837	BaZnO2	166	4	5.1417	0.711107	1.83529	0.263705
1250722	CsYO2	166	4	5.5967	0.747932	5.28207	0.722804
14849	SrHfN2	166	4	6.03153	0.780428	14.4688	1.16043
1382175	KGaO2	166	4	6.97413	0.84349	4.44323	0.647699
1348436	RbInO2	166	4	7.08763	0.850501	5.70512	0.756265
1501292	MgCdO2	166	4	7.10613	0.851633	12.0816	1.08212
6141	RbScO2	166	4	7.16553	0.855249	5.57623	0.746341
5148	NaHF2	166	4	7.22747	0.858986	1.48492	0.171704
11669	Ca2NCl	166	4	7.34923	0.866242	6.33647	0.801847
646382	RbYO2	166	4	7.763	0.89003	3.89185	0.590156
1388311	KYO2	166	4	8.72607	0.940819	3.87971	0.588799
4457	LiHF2	166	4	9.01027	0.954738	1.57465	0.197184
6137	NaInO2	166	4	9.45727	0.975766	8.96733	0.952663
1348546	RbAlO2	166	4	9.59933	0.982241	8.16946	0.912193
1742253	SrSnN2	166	4	10.732	1.03068	11.0804	1.04456
1384722	NaScO2	166	4	11.4144	1.05745	14.4633	1.16027
1385806	Ca2HN	166	4	13.154	1.11906	9.54719	0.979875
1346557	KAlO2	166	4	13.2913	1.12357	8.02703	0.904555
1385441	YAgO2	166	4	13.6245	1.13432	12.72	1.10449
27098	ScAgO2	166	4	16.9247	1.22852	14.9433	1.17445
1744141	NaAlO2	166	4	20.9233	1.32063	9.34684	0.970665
16575	NaCoO2	166	4	30.291	1.48131	4.63961	0.666481
1731367	SrPdN2	166	4	43.0183	1.63365	3.03633	0.482349
1731417	AlAuO2	166	4	43.2317	1.6358	16.6869	1.22238
1349142	AlAgO2	166	4	47.921	1.68053	13.3141	1.12431
5674	B4C	166	15	124.733	2.09598	226.472	2.35501
18724	B6As	166	14	124.857	2.09641	133.237	2.12462
1570943	Cs3IF2	164	6	0.218797	-0.659959	0.605138	-0.218146
1570945	Cs3Cl2F	164	6	0.272977	-0.563874	0.639963	-0.193845
1736639	Tl2MoF6	164	9	0.314033	-0.503024	0.700146	-0.154811
1570937	Cs3BrF2	164	6	0.343327	-0.464292	0.7604	-0.118958
1571294	Ba3S2O	164	6	0.49852	-0.302317	1.94219	0.288293
1570863	K3IF2	164	6	0.537377	-0.269721	1.20703	0.0817164
1570947	Cs3ClF2	164	6	0.540427	-0.267263	0.768497	-0.114358
1570554	Cs2KCl3	164	6	0.657223	-0.182287	0.515728	-0.28758
1570885	Cs2KF3	164	6	0.847303	-0.0719611	0.580831	-0.23595
1570949	Cs3HF2	164	6	0.921897	-0.0353178	0.797087	-0.0984943
1570555	CsK2Cl3	164	6	0.984903	-0.00660639	1.22668	0.0887305
1563155	Ba3SO2	164	6	1.08447	0.0352162	2.48078	0.394588
23014	Cs2IrF6	164	9	1.09004	0.0374424	2.1178	0.325886
1373711	Rb2OsF6	164	9	1.1772	0.0708503	0.87237	-0.0592994
1736646	Cs2RhF6	164	9	1.31713	0.11963	1.12867	0.0525661
1570551	KRb2Cl3	164	6	1.464	0.165541	0.782011	-0.106787
1571357	Sr3S2O	164	6	1.64743	0.216808	3.66322	0.563863
1570553	K2RbCl3	164	6	1.99527	0.300001	1.76447	0.246614
26333	Ba2H3Cl	164	6	2.7223	0.434936	2.46071	0.39106
1348968	Sr2H3Cl	164	6	4.21707	0.62501	3.40194	0.531727
1482117	LiInP	164	6	6.1713	0.790377	4.83751	0.684622
1385158	Li2ZrCl6	162	9	0.443627	-0.352982	0.414118	-0.382876
1738491	SrLi3SnN3	148	16	0.841907	-0.0747361	4.42015	0.645437
1752995	SrLi3GeN3	148	16	2.3866	0.37778	4.35798	0.639285
1752998	Li3CaGeN3	148	16	2.87297	0.458331	5.67172	0.753715
1361113	CsSe	142	16	0.0339713	-1.46889	0.357766	-0.4464
22541	Cs3ZnBr5	140	18	0.0431867	-1.36465	0.138921	-0.857231
646353	Tl5Se2I	140	16	0.0675133	-1.17061	0.356841	-0.447525
1587983	KRbSnTe5	140	16	0.339923	-0.468619	0.456568	-0.340495
1715437	Cs2PtBr6	139	9	0.0100213	-1.99907	0.107935	-0.966837
1707313	Rb2PtCl6	139	9	0.0517447	-1.28613	0.106817	-0.971358
1508970	CsAuBr2Cl	139	10	0.0927907	-1.0325	0.123513	-0.908289
1709501	Cs2Ge(IBr2)2	139	9	0.11511	-0.938887	0.131666	-0.880527
11155	In3Ru	136	16	3.3168	0.520719	4.32994	0.636482
25525	Ga3Ru	136	16	4.93527	0.693311	3.4404	0.536609
30316	Ga3Os	136	16	5.38287	0.731014	2.31078	0.363758
1554756	KNaSe	131	6	0.236627	-0.625936	0.442294	-0.354289
1561099	KNaTe	131	6	0.242237	-0.61576	0.429106	-0.367436
1554899	KNaS	131	6	0.260127	-0.584815	0.596386	-0.224473
1554755	CsKSe	131	6	0.29618	-0.528444	0.365645	-0.43694
1554906	CsKS	131	6	0.35535	-0.449344	0.539138	-0.2683
1554766	CsRbSe	131	6	0.579087	-0.237256	0.328964	-0.482852
1561168	CsRbS	131	6	0.808317	-0.0924185	0.645453	-0.190135
1554757	KRbSe	131	6	0.97946	-0.0090133	0.557935	-0.253417
1554873	KRbS	131	6	1.15417	0.0622685	0.706628	-0.150809
1440529	KCuS	129	6	0.255447	-0.5927	1.80466	0.256396
1385028	CsAgSe	129	6	0.266647	-0.574064	0.377178	-0.423454
1364380	RbAgS	129	6	0.352273	-0.45312	0.680353	-0.167266
1345162	KAgS	129	6	0.407097	-0.390302	1.0377	0.0160702
1347258	CsAgS	129	6	0.408687	-0.38861	0.545339	-0.263334
1344717	CsKSe	129	6	0.45728	-0.339818	0.290734	-0.536504
1465896	KAgSe	129	6	0.459773	-0.337456	0.613097	-0.212471
2803	NaCuSe	129	6	0.466113	-0.331508	2.14436	0.331297
1343111	NaAgSe	129	6	0.521737	-0.282549	0.914939	-0.0386077
1375819	CsSrBi	129	6	0.741057	-0.130149	0.790831	-0.101916
1753916	LiTlTe	129	6	0.80794	-0.0926209	1.06413	0.0269934
1482824	CsRbSe	129	6	0.84889	-0.0711486	0.430459	-0.366068
7463	CsNaSe	129	6	0.883823	-0.0536345	0.706635	-0.150805
1345907	BaICl	129	6	0.944347	-0.0248685	0.791448	-0.101578
18671	CsNaTe	129	6	1.04058	0.0172769	0.249132	-0.60357
1554905	CsKS	129	6	1.05344	0.0226098	0.639931	-0.193867
1554802	RbNaTe	129	6	1.12047	0.0493989	0.571194	-0.243216
1554868	CsRbS	129	6	1.17157	0.068767	0.612754	-0.212714
1376086	CsLiTe	129	6	1.19316	0.0766975	1.04246	0.0180586
1554884	KLiS	129	6	1.20277	0.0801814	2.76706	0.442019
1554754	KRbSe	129	6	1.23577	0.0919365	0.596411	-0.224454
12490	RbNaS	129	6	1.28907	0.110275	0.932955	-0.0301392
1378312	CsCaSb	129	6	1.30321	0.115013	0.617526	-0.209345
1554812	KRbTe	129	6	1.36303	0.134506	0.563545	-0.249072
1345326	RbNaSe	129	6	1.37583	0.138566	0.548457	-0.260857
1376419	CsLiSe	129	6	1.38983	0.142961	0.906405	-0.0426777
27993	KCdAs	129	6	1.4028	0.146997	0.771133	-0.112871
1345914	KNaTe	129	6	1.42813	0.154769	0.742197	-0.129481
1378294	CsCdAs	129	6	1.44035	0.158467	0.597984	-0.22331
24972	RbCaSb	129	6	1.45684	0.163411	0.841135	-0.0751342
1374739	RbCdAs	129	6	1.48544	0.171856	0.52597	-0.279039
1554698	BaBrCl	129	6	1.50923	0.178756	1.45435	0.162669
1367756	RbCaBi	129	6	1.5488	0.189995	0.873634	-0.0586706
1554696	BaClF	129	6	1.63037	0.212285	2.03236	0.308
1371336	CsCaBi	129	6	1.64619	0.216481	0.758335	-0.120139
1377160	NaMgBi	129	6	1.86527	0.270741	1.93682	0.287088
1364395	KNaSe	129	6	1.92147	0.283633	0.850747	-0.0701997
28071	NaZnAs	129	6	2.0655	0.315025	1.67226	0.223304
14201	RbLiSe	129	6	2.067	0.31534	0.925839	-0.0334644
6877	BaHI	129	6	2.13917	0.330245	1.53992	0.187497
1741827	KCdP	129	6	2.22787	0.347889	0.823539	-0.0843157
2133	BaBrF	129	6	2.24677	0.351558	1.01911	0.00821932
1554897	KNaS	129	6	2.26433	0.35494	1.55922	0.192909
1554852	KRbO	129	6	2.29333	0.360467	0.576183	-0.239439
28733	KMgBi	129	6	2.32635	0.366674	1.90016	0.27879
1374578	RbLiTe	129	6	2.4666	0.392099	1.29447	0.112091
1554831	KNaO	129	6	2.4866	0.395606	1.32299	0.121557
1482609	CsCaP	129	6	2.5033	0.398513	0.632227	-0.199127
7599	NaMgAs	129	6	2.58463	0.412399	1.40579	0.147922
1377949	CsMgAs	129	6	2.5867	0.412746	1.62004	0.209526
12266	KLiTe	129	6	2.8985	0.462173	1.39961	0.146008
1482197	RbMgSb	129	6	3.08323	0.489006	1.61514	0.20821
1367559	RbMgAs	129	6	3.08667	0.48949	1.65494	0.218781
20218	SrIF	129	6	3.12687	0.495109	1.39523	0.144645
1740261	KZnP	129	6	3.1462	0.497786	2.1749	0.33744
7564	KMgSb	129	6	3.4851	0.542215	1.84271	0.265457
1372462	RbMgP	129	6	3.52047	0.5466	1.65549	0.218926
1376631	CsMgP	129	6	3.58434	0.554409	1.60248	0.204794
1482058	BaLiBi	129	6	3.7751	0.576928	1.78583	0.251839
6876	BaHBr	129	6	3.84977	0.585434	1.62052	0.209654
28055	KMgAs	129	6	4.31547	0.635028	2.00878	0.302933
11419	NaLiS	129	6	4.49707	0.652929	3.96963	0.59875
1732956	SrHI	129	6	4.65243	0.66768	1.92841	0.2852
6874	SrHCl	129	6	4.87363	0.687853	3.06725	0.486749
12268	KLiSe	129	6	5.02333	0.700992	1.34907	0.130033
1345735	CsLiS	129	6	5.43927	0.73554	1.54913	0.190088
1481104	Hf(BeRu)2	127	10	14.9452	1.1745	52.2733	1.71828
1481046	Mg(BeOs)2	127	10	50.3173	1.70172	41.0049	1.61284
1476223	Cs2PtBr4	123	7	0.205977	-0.686182	0.116793	-0.932583
1545013	CsRbF2	123	4	1.25137	0.0973846	0.443713	-0.352898
1384201	CsNaF2	123	4	1.60847	0.206412	0.655343	-0.183531
1443766	BaF2	123	3	2.9036	0.462937	3.81929	0.581983
1554635	BaSrF4	123	6	3.8743	0.588193	3.78543	0.578115
1553208	Sr2HCl2F	115	6	2.86247	0.45674	1.50121	0.176441
22302	B2AsP	115	4	392.037	2.59333	145.401	2.16257
1617187	CsK2RbI2O	107	7	0.153067	-0.815118	0.132482	-0.877843
1552803	BaSr(BrF)2	99	6	1.35628	0.13235	0.953049	-0.020885
1552814	Ba2IBrF2	99	6	1.50622	0.177887	0.942878	-0.0255447
1552813	Ba2BrClF2	99	6	1.54187	0.188047	1.07196	0.0301777
1553213	BaSr(ClF)2	99	6	1.71167	0.233419	1.2482	0.0962851
1553209	Sr2BrClF2	99	6	1.81844	0.259698	1.64674	0.216625
1554207	Ba2H2BrCl	99	6	2.0162	0.304534	1.66527	0.221485
1554201	BaSr(HCl)2	99	6	2.7917	0.445869	2.20162	0.342742
12101	K5Te3	87	16	0.174373	-0.75852	0.53819	-0.269064
25648	SiB3	74	32	37.9073	1.57872	81.9607	1.91361
26310	Mg(B6C)2	74	30	50.672	1.70477	82.066	1.91416
1050548	BaCdSeO	73	16	0.751017	-0.12435	1.21344	0.0840201
1049845	SrCdSO	73	16	2.34627	0.370377	1.67207	0.223255
13114	RbS	71	4	1.8684	0.27147	0.952861	-0.0209705
4778	Rb2O2	71	4	2.69473	0.430516	0.463199	-0.334232
25498	Cs3NaPb4	63	16	0.121807	-0.914328	0.402606	-0.39512
1441692	CsI	63	4	0.459067	-0.338124	0.466591	-0.331064
1441551	KAgSe	63	6	1.06412	0.026992	0.913366	-0.039355
1368284	KAgS	63	6	1.56098	0.193396	1.01942	0.00835471
1733666	KCdI3	62	20	0.099366	-1.00276	0.125659	-0.900807
24635	RbSnI3	62	20	0.117203	-0.931061	0.103409	-0.98544
1346883	CsCdBr3	62	20	0.13547	-0.868156	0.112242	-0.949843
2834	CsSnI3	62	20	0.144753	-0.839371	0.115459	-0.937573
31052	ZnSb	61	16	0.43375	-0.362761	1.42323	0.153275
647018	CdSb	61	16	0.695043	-0.157988	0.763341	-0.117281
1718	CdAs	61	16	0.85111	-0.0700143	0.623994	-0.20482
1587037	CsK2Sn2Ge2Au	59	16	0.660987	-0.179807	0.363259	-0.439783
1049929	BaNiSO	57	16	1.02483	0.0106518	2.04733	0.311187
1053793	SrSnTeO	57	16	2.34423	0.370001	1.7348	0.23925
1053847	SrTePtO	57	16	3.6391	0.560994	1.77415	0.248991
1647622	CaFeO2	47	4	11.5248	1.06163	5.55295	0.744523
26117	LiB6C	38	16	57.744	1.76151	52.2482	1.71807
1479459	NaBr	15	16	0.502983	-0.298446	1.12396	0.0507492
1479592	KCl	15	16	0.58791	-0.230689	0.972757	-0.0119955
11998	Hg2ClO	15	16	0.69301	-0.15926	0.822991	-0.0846052
1479442	NaCl	15	16	0.90096	-0.0452945	1.20932	0.0825417
15054	NaAuSe2	14	16	1.20117	0.0796033	1.68126	0.225636
1101462	KBiSO	14	16	1.3838	0.141073	1.79493	0.254048
1038641	CsScSeO	14	16	2.4002	0.380247	1.97301	0.29513
1038782	NaYSO	14	16	4.9657	0.69598	6.33661	0.801857
1038781	LiYSO	14	16	5.2168	0.717404	6.46845	0.8108
1054640	IrAuSeO	14	16	5.42957	0.734765	6.92232	0.840252
1054643	NaIrSeO	14	16	9.2056	0.964052	5.96444	0.77557
1101381	NaIrSO	14	16	9.60997	0.982722	9.43592	0.974784
646236	LiYO2	14	16	11.6357	1.06579	5.09687	0.707303
5342	MnHO2	14	16	16.5173	1.21794	5.08089	0.70594
1385204	RbNaO	12	6	1.37663	0.138816	0.565266	-0.247747
1383083	KNaO	12	6	3.22697	0.508794	0.811965	-0.090463
1481321	CaZnAs	12	6	4.11653	0.614532	2.07542	0.317107
1482611	CaZnP	12	6	5.99207	0.777577	2.59033	0.413355
1480856	KAlP	12	6	7.6165	0.881755	2.61379	0.41727
1735924	RbAgPdSe5	11	16	0.48311	-0.315954	0.566282	-0.246967
23606	KTeP2	11	16	1.19977	0.0790992	1.02222	0.00954352
1732298	Ba2LiIN4	11	16	2.48023	0.394493	1.32078	0.120829
1101382	KIrSO	2	16	7.62193	0.882065	4.73424	0.675251
94380	LiMoS2	2	16	8.9517	0.951906	11.8762	1.07468
