# Supplementary material for: High-throughput computational discovery of 3218 ultralow thermal conductivity and dynamically stable materials by dual machine learning models
Source: Royal Society of Chemistry journal article supplement (doi:10.1039/d3ta04874h), 2023-01-01
Supplement: d3ta04874h2.pdf [file d3ta04874h2.pdf]

*Supporting Information for*

**High-Throughput Computational Discovery of 3,218 Ultralow Thermal Conductivity and Dynamically Stable Materials by Dual Machine Learning Models**

Joshua Ojih,<sup>1</sup> Chen Shen,<sup>2</sup> Alejandro Rodriguez,<sup>1</sup> Uche Onyekpe,<sup>3</sup> Hongbin Zhang,<sup>2,\*</sup> Kamal Choudhary,<sup>4</sup>  
and Ming Hu<sup>1,\*</sup>

<sup>1</sup>Department of Mechanical Engineering, University of South Carolina, SC 29208, USA

<sup>2</sup>Institute of Materials Science, Technical University of Darmstadt, Darmstadt 64287, Germany

<sup>3</sup>Centre for Computational Sciences and Mathematical Modelling, Coventry University, Priory Road, Coventry, CV1 5FB, UK

<sup>4</sup>Materials Science and Engineering Division, National Institute of Standards and Technology, Gaithersburg, MD 20899, USA

---

\* Authors to whom all correspondence should be addressed. E-Mail: [h Zhang@tmm.tu-darmstadt.de](mailto:h Zhang@tmm.tu-darmstadt.de) (H.Z.); [hu@sc.edu](mailto:hu@sc.edu) (M.H.)

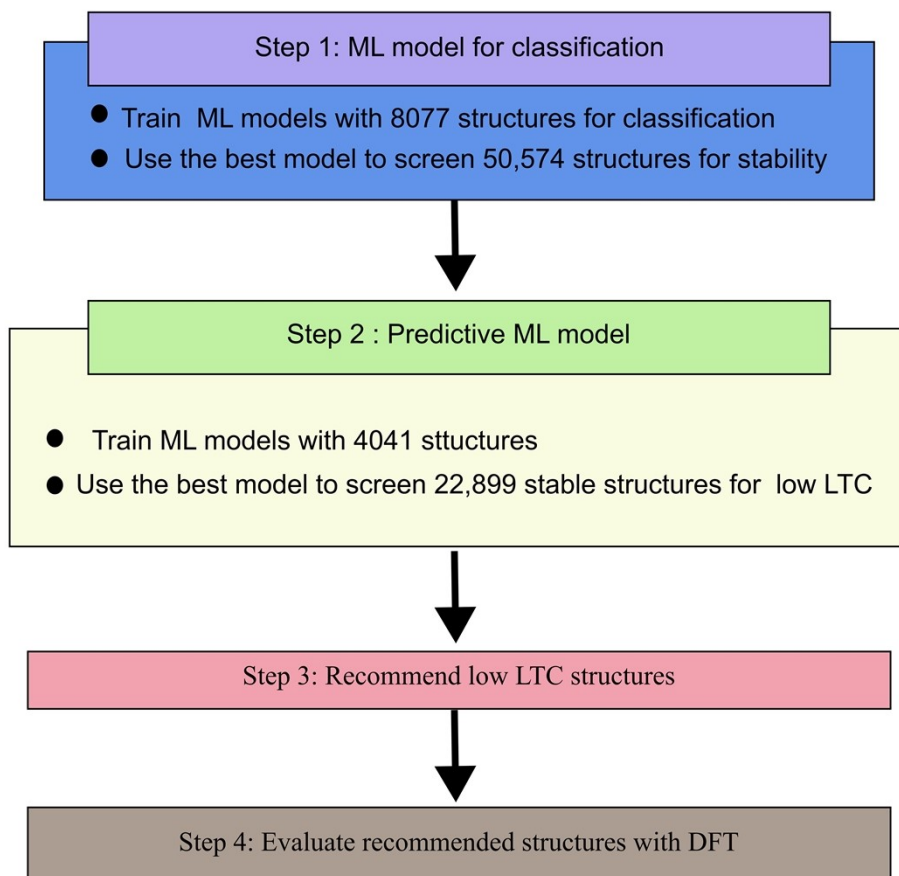

**Figure S1:** Overview of the workflow. After training classification model and predicting stable structures (Step 1), step 2 is to train and screen the stable structures for low LTC. Step 3 and step 4 are recommendation and verification of low LTC structures, respectively.

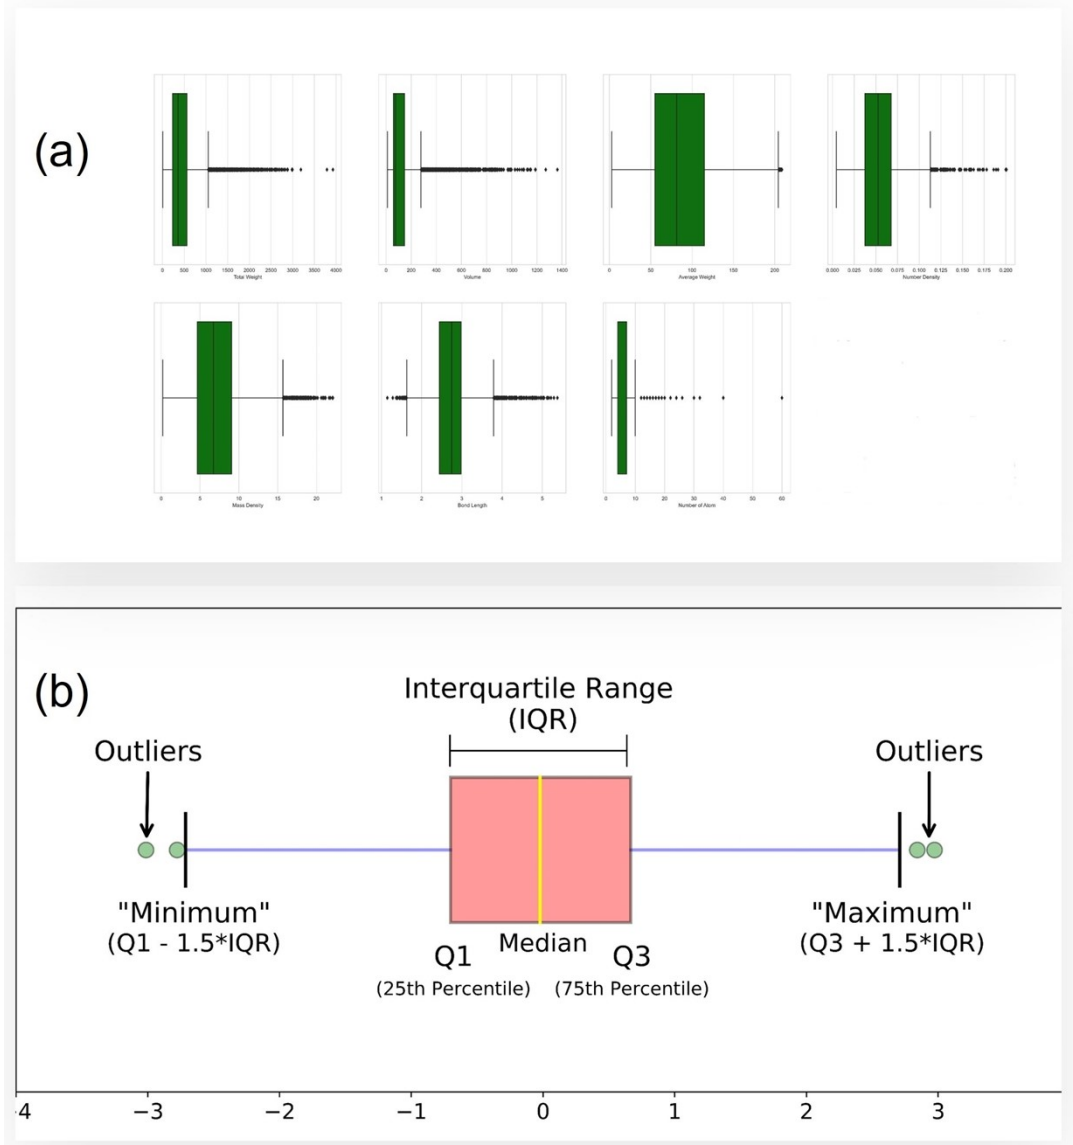

**Figure S2:** (a) Outliers within the independent variables for the machine learning classification models. Panel (b) explains the boxplot, showing the outliers.

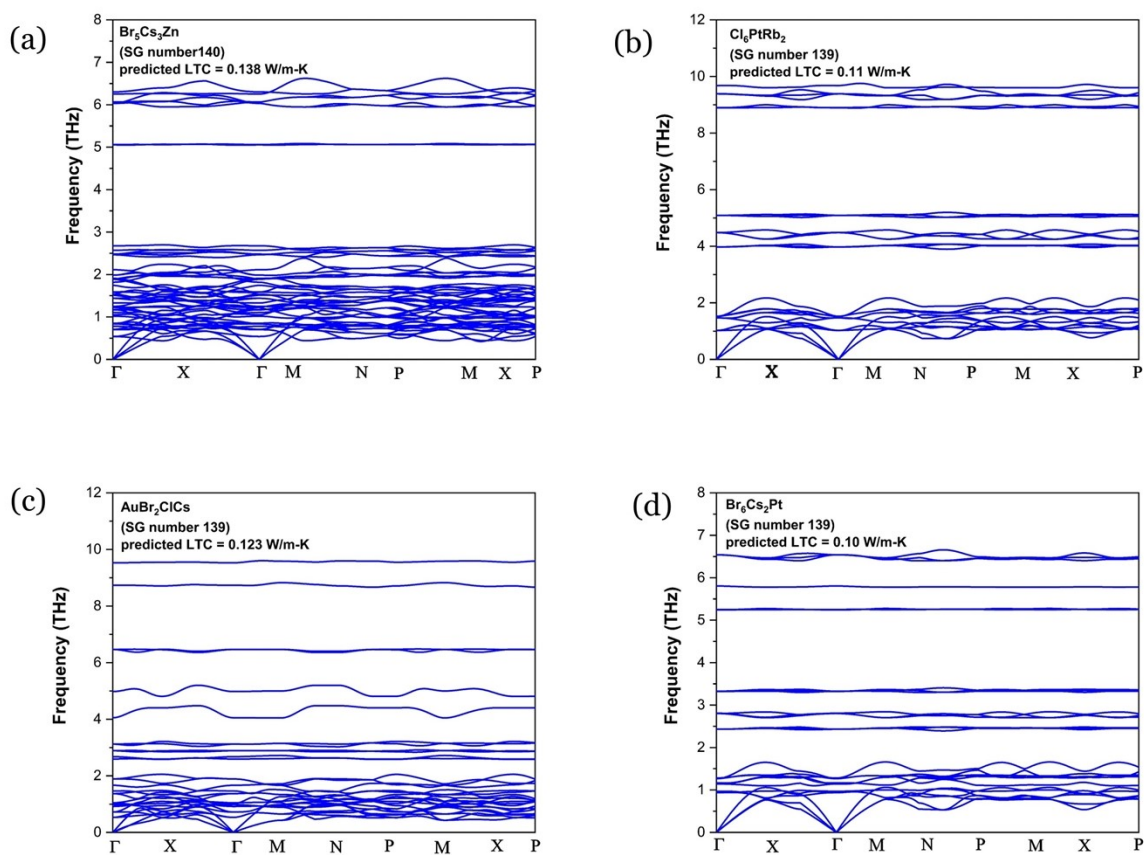

**Figure S3:** Phonon dispersions of selected structures (a)  $\text{Br}_5\text{Cs}_3\text{Zn}$ , (b)  $\text{Cl}_6\text{PtRb}_2$ , (c)  $\text{AuBr}_2\text{ClCs}$ , and (d)  $\text{Br}_6\text{Cs}_2\text{Pt}$  along high symmetry paths. The non-negative phonon dispersions prove the thermodynamic stability of the structures. The low-lying acoustic phonon frequencies are also clearly seen, which is partially responsible for their ultralow lattice thermal conductivity.

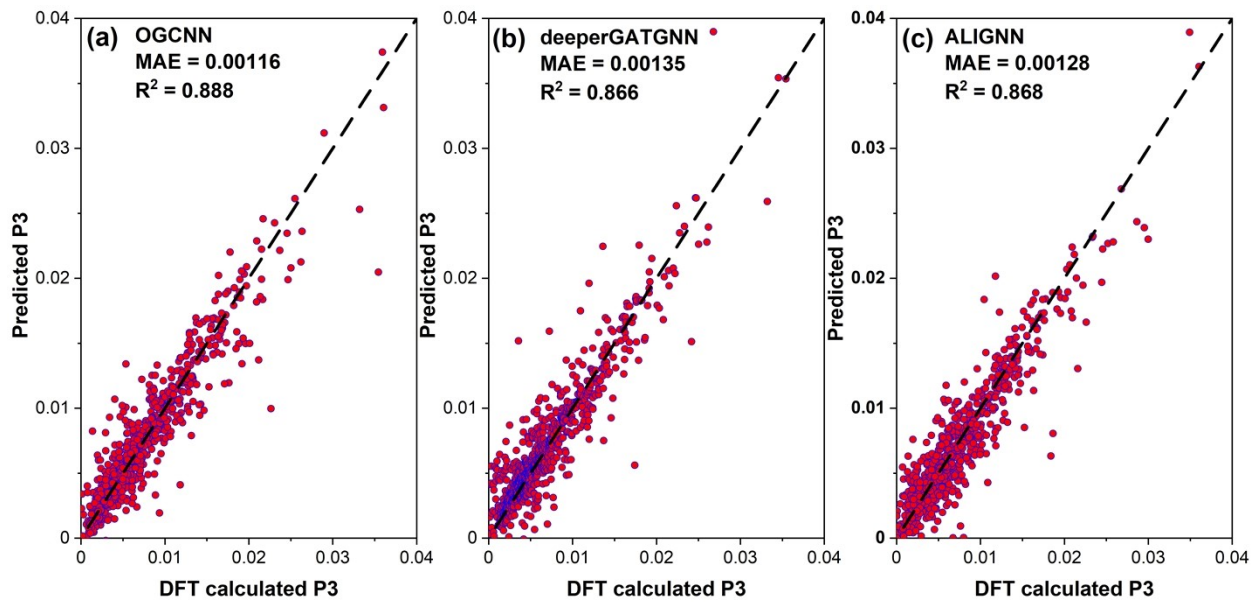

**Figure S4:** Testing results of  $P_3$  parameter for the three GNN predictive models for 808 structures: (a) OGCNN, (b) deeperGATGNN, and (c) ALIGNN.

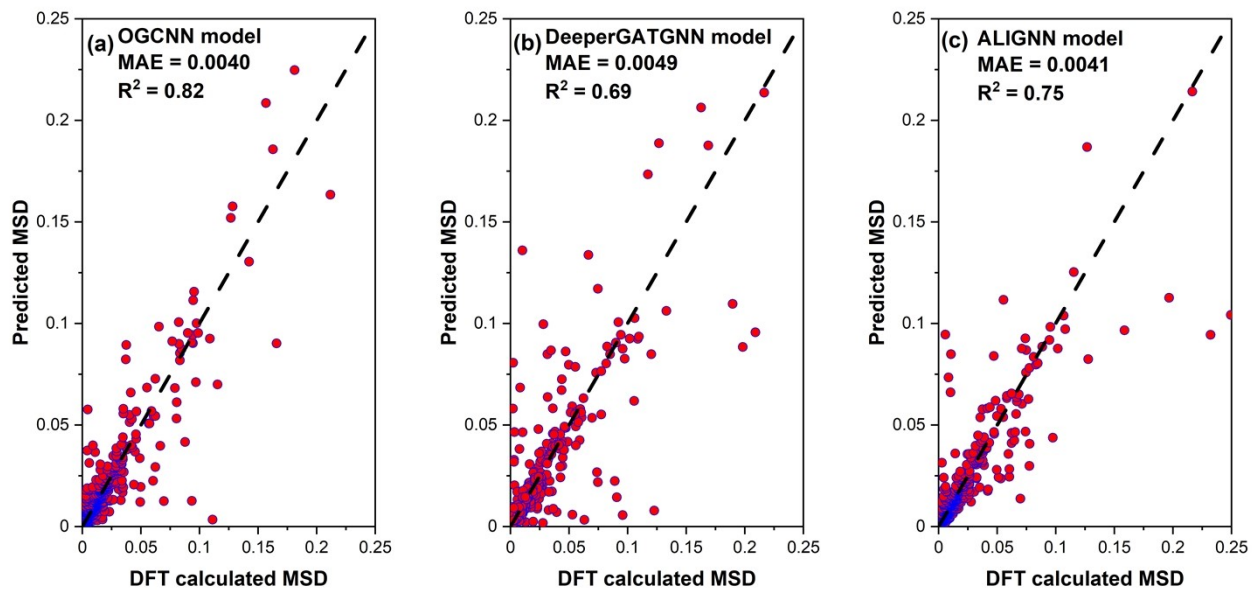

**Figure S5:** Testing results of mean squared displacement (MSD) of three GNN predictive models for 808 structures: (a) OGCNN, (b) deeperGATGNN, and (c) ALIGNN.

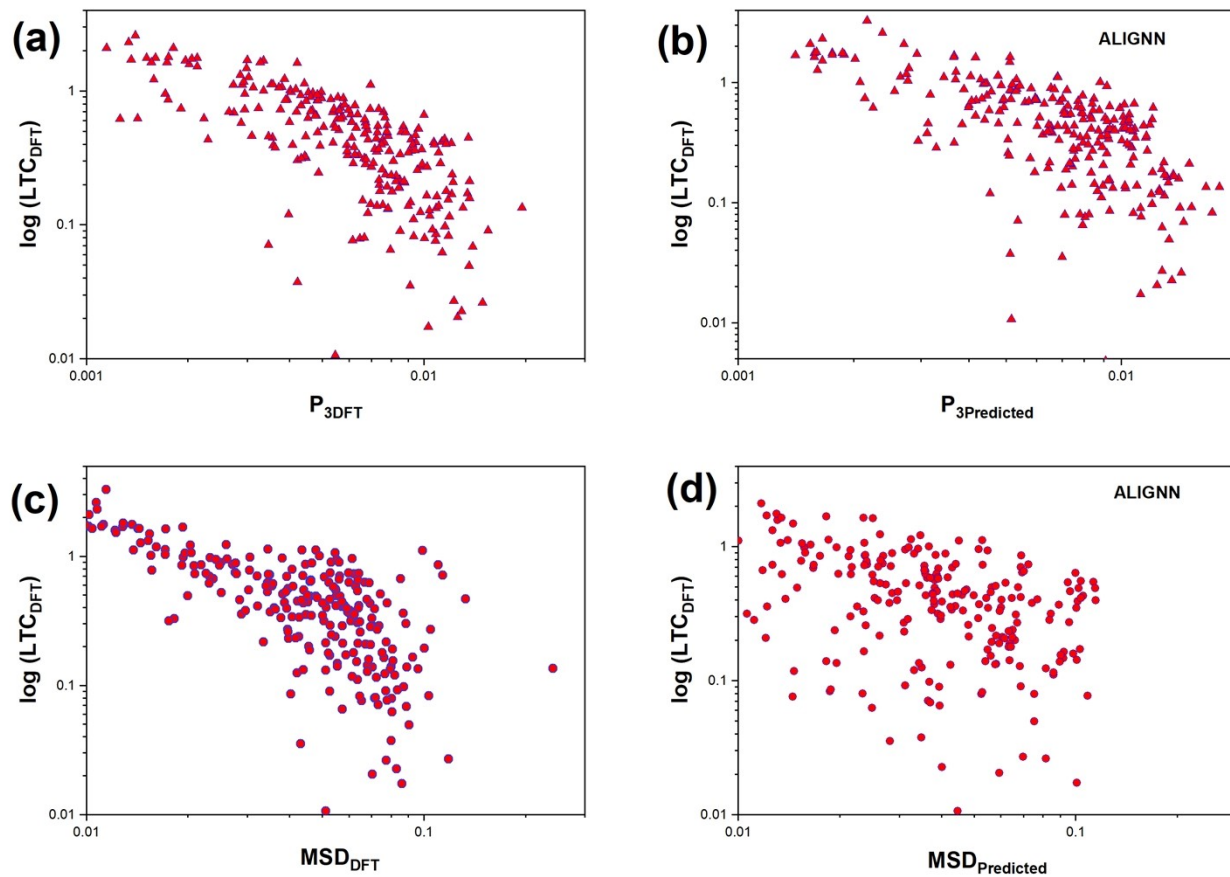

**Figure S6:** (a) DFT calculated  $P_3$  parameter versus LTC, (b) ALIGNN model predicted  $P_3$  parameter versus LTC, (c) DFT calculated MSD versus LTC, (d) ALIGNN model predicted MSD versus LTC.
