# Supplementary material for: High-throughput computational discovery of 3218 ultralow thermal conductivity and dynamically stable materials by dual machine learning models
Source: Royal Society of Chemistry journal article supplement (doi:10.1039/d3ta04874h), 2023-01-01
Supplement: d3ta04874h3.xlsx [file d3ta04874h3.xlsx]

## Sheet: Ultralow_LTC_Prediction_3218
OQMD_ID	Formula	Space_Group_Number	Number of Atoms	LTC_Prediction (W/mK)	LTC_Prediction_log_Value
1374168	Sr2CdBi2	36	20	0.999323	-0.000294082
953218	LiTlGa	216	12	0.999093	-0.000393923
543377	Sr2AgRh	225	16	0.998965	-0.000449523
1283682	Li2CoCl4	227	56	0.998799	-0.000522006
1554876	RbNa3S2	115	6	0.998554	-0.000628259
543641	Sr2LiAs	225	16	0.997821	-0.000947351
372180	CaTl2Ga	225	16	0.997461	-0.00110423
13593	BaCuSeF	129	8	0.997401	-0.00113036
446656	KLi2Te	225	16	0.997108	-0.00125777
1490708	CsZrAgSeS2	11	12	0.996899	-0.00134875
1110231	CaMg2Cu	216	16	0.996799	-0.0013925
1381978	Na2LiSb	194	8	0.996607	-0.00147599
923431	InSnPb	216	12	0.99655	-0.00150106
1384006	BaCdS2	26	16	0.996526	-0.00151135
544898	KSr2Ge	225	16	0.996523	-0.00151272
566704	InGaPt	216	12	0.996473	-0.00153453
566442	RbSrPt	216	12	0.996329	-0.0015974
1439943	K2O	12	12	0.996183	-0.00166109
1117069	Ba2MgSc	216	16	0.996109	-0.00169316
1505429	Ba2MgSbAs	36	20	0.995851	-0.00180546
343837	MgHg3	221	4	0.995763	-0.00184405
1381040	RbScZnSe3	11	12	0.995466	-0.00197365
1429403	Cs2ScNbSe6	225	40	0.995125	-0.00212244
543201	Sr2MgSi	225	16	0.995036	-0.00216134
568496	TlInPt	216	12	0.994853	-0.00224099
818940	LiCdSiNi	216	16	0.994534	-0.00238027
1611843	BaSiAg2(SeS)2	5	16	0.994442	-0.00242049
917380	KInSb	216	12	0.994267	-0.00249688
898829	BaSrPd	216	12	0.994236	-0.00251048
10762	YInAu2	225	16	0.994164	-0.00254201
1514390	CsK2Ag3P2	166	24	0.993612	-0.00278305
1506996	Cs2K2RbReO6	12	24	0.993527	-0.00282039
1476179	K4CaAs2	166	21	0.993327	-0.00290794
547701	MgBi2Pt	225	16	0.993234	-0.00294821
1364195	Ba2ZnAs2	36	20	0.993009	-0.00304663
547272	CaBi2Rh	225	16	0.992921	-0.00308523
579308	BaCdSi	216	12	0.992885	-0.00310101
892425	SrIrPb	216	12	0.992638	-0.0032093
682950	RbRuO3	62	20	0.992578	-0.00323534
10647	YInAg2	225	16	0.992268	-0.00337109
505231	YInAg2	225	16	0.992268	-0.00337109
1479521	RbBr	14	16	0.992142	-0.00342615
1012434	ScBeTlPt	216	16	0.991991	-0.00349206
556888	Zr2NiRh	225	16	0.991975	-0.00349948
25133	Sr2I2O	72	20	0.991757	-0.00359474
1448929	SrAgBi	186	6	0.991681	-0.0036281
568138	LiTlPt	216	12	0.991585	-0.00367025
899460	GaTePd	216	12	0.991539	-0.00369028
892457	SrHgIr	216	12	0.99146	-0.00372499
345431	Na3Sc	221	4	0.991432	-0.00373716
942915	AlTlSb	216	12	0.991167	-0.00385332
543165	Sr2GaGe	225	16	0.99047	-0.0041586
1478767	K2AgSb	63	16	0.990133	-0.0043065
1493159	RbZrAgTeS2	11	12	0.990004	-0.00436308
1481307	Sr3CaPd	12	20	0.989977	-0.0043748
1570657	CsK2Br3	164	6	0.989922	-0.00439883
1505397	Sr2CdBiSb	36	20	0.988614	-0.00497313
454899	BaYIn2	225	16	0.98797	-0.00525627
914397	SrZnSn	216	12	0.987087	-0.00564457
898684	TlGePd	216	12	0.986729	-0.00580221
511676	ScAl2Pt	225	16	0.986495	-0.00590498
579647	SiHgGe	216	12	0.986259	-0.00600897
1358380	KYHgS3	62	24	0.986102	-0.00607817
819212	ScCdGaNi	216	16	0.985744	-0.00623577
343864	RbSr3	221	4	0.985615	-0.00629275
897971	BaNaPd	216	12	0.98507	-0.00653269
1432377	YMg(TlCl3)2	225	40	0.98473	-0.00668277
646310	K2LiAlF6	166	60	0.984272	-0.00688486
344363	Sr3Cu	221	4	0.984255	-0.00689248
1209418	Cs2AlAgF6	225	40	0.983977	-0.00701519
1552770	K2CaMgBi2	115	6	0.983544	-0.0072062
1019498	HfAlNiAu	216	16	0.982655	-0.00759902
1017957	Ba2AsAu	62	16	0.982435	-0.0076963
452985	SrMgIn2	225	16	0.982384	-0.00771871
898506	GeTePd	216	12	0.982354	-0.00773191
1345079	Sr3(BSe3)2	15	44	0.98226	-0.0077736
796492	HfTlCuAu	216	16	0.981926	-0.00792104
1563156	Ba3Te2O	164	6	0.981703	-0.00801977
1749667	K2NiCl4	123	7	0.980977	-0.00834126
543826	Sr2CuAs	225	16	0.980894	-0.00837805
2231	CsMnCl3	166	45	0.980845	-0.00839976
522473	SrCaGa2	225	16	0.980726	-0.00845215
1751894	NaCdP	186	6	0.980524	-0.00854169
418573	Ba2CaGe	225	16	0.980476	-0.00856321
1744066	K4RuO4	12	18	0.980394	-0.0085992
988287	ZrCdPb	216	12	0.980389	-0.00860174
898301	InTePd	216	12	0.980357	-0.00861569
1023023	LiCaZrAu	216	16	0.980198	-0.00868598
1647174	Ba2TeSe	26	8	0.980134	-0.00871465
566665	GaSbPt	216	12	0.979681	-0.00891534
11420	RbNaO	129	6	0.979617	-0.00894363
1041582	SrCaCdIn	216	16	0.979291	-0.0090883
583339	SrCdAs	216	12	0.978442	-0.00946478
936653	NaAgGe	216	12	0.978437	-0.00946715
682656	CsRuO3	62	20	0.978421	-0.00947406
1386996	Sr(GaSe2)2	66	28	0.978147	-0.0095958
1369535	Ba2CdP2	36	20	0.977769	-0.00976378
373118	LiTl2Pd	225	16	0.977562	-0.00985585
520908	CaGa2Cu	225	16	0.976892	-0.0101532
947406	NaSrAu	216	12	0.976746	-0.0102182
742372	LiMg2Hg	216	16	0.976403	-0.0103709
1372513	Sr2HgAs2	36	20	0.976148	-0.0104842
1346885	Ba2MgSe3	62	24	0.975278	-0.0108715
1034750	NaInNiSn	216	16	0.975205	-0.0109041
1368927	CsMgAgSe2	67	20	0.975192	-0.01091
442966	LiCa2Pt	225	16	0.974917	-0.0110324
1250402	Ba2CdTe2F2	115	7	0.974763	-0.0111008
444802	Ca2HgAu	225	16	0.97464	-0.0111557
897888	NaAgPd	216	12	0.974566	-0.011189
1575809	Cs2AlCrCl6	225	40	0.974413	-0.0112571
543958	Sr2PtAu	225	16	0.973985	-0.0114476
1358477	RbScZnSe3	62	24	0.973947	-0.0114646
1447462	SrAgBi	194	6	0.973873	-0.0114976
580268	TlCdSi	216	12	0.97354	-0.0116463
543849	Sr2InSb	225	16	0.973377	-0.0117189
544861	Sr2NiPd	225	16	0.972675	-0.0120322
1570643	Rb3BrCl2	164	6	0.972674	-0.0120327
899644	RbLiPd	216	12	0.972425	-0.0121437
314709	Sr3Rh	225	16	0.972051	-0.0123108
1442214	RbCl	194	4	0.971932	-0.0123641
25503	BaZnCl4	60	24	0.971788	-0.0124284
947643	BaAlAu	216	12	0.971719	-0.0124592
1009586	CaZrBePt	216	16	0.97171	-0.0124633
26607	Sr11(CdSb2)6	12	58	0.971376	-0.0126125
796176	YCdGaCu	216	16	0.970806	-0.0128678
1710543	Cs2KAlF6	225	40	0.969738	-0.0133454
580193	CdSiPb	216	12	0.96955	-0.0134296
1611852	SrSiAg2(SeS)2	5	16	0.969517	-0.0134445
936848	AgGeTe	216	12	0.969154	-0.013607
1432559	Cs2AlRhCl6	225	40	0.968811	-0.0137609
371289	LiTl2Rh	225	16	0.968561	-0.013873
1495841	Na3Sr3SbAs2	189	9	0.968538	-0.0138835
581866	BaCdAs	216	12	0.968388	-0.0139505
1368052	KSrBi	129	6	0.968115	-0.0140731
393901	SrMg2Hg	225	16	0.967949	-0.0141473
1393542	Ba2Si(SeS)2	11	14	0.967507	-0.0143461
868347	GaSnGe	216	12	0.967498	-0.0143498
1514142	Ba2SrGeBr2	71	12	0.965998	-0.0150238
868884	InAgGe	216	12	0.965912	-0.0150622
416264	Hf2CoAu	225	16	0.965687	-0.0151634
938245	SrSiAg	216	12	0.96534	-0.0153197
452989	BaScIn2	225	16	0.965275	-0.0153489
1505310	Sr2CdBiAs	36	20	0.965163	-0.0153995
1256646	NaYCdSe3	63	24	0.964872	-0.0155303
999867	ZrCoCuPb	216	16	0.964007	-0.0159199
1250401	Ba2ZnTe2F2	115	7	0.963518	-0.0161401
880014	RbLiSb	216	12	0.96341	-0.016189
1517019	K2NaScF6	87	20	0.963225	-0.0162723
444986	NaCa2Te	225	16	0.963008	-0.0163703
1505299	BaSrCdBiP	36	20	0.962509	-0.0165952
1282236	Cu2SnPbSe4	121	16	0.96225	-0.016712
8094	TlCuF3	123	5	0.961919	-0.0168616
580908	ZnSiHg	216	12	0.961717	-0.0169529
1345239	RbBS2	166	72	0.961644	-0.0169857
1531882	Ba3GeO	140	20	0.961267	-0.017156
305248	SrI	221	2	0.961103	-0.0172299
371767	SrYTl2	225	16	0.961019	-0.0172681
1000705	HfCuIrPb	216	16	0.960263	-0.0176099
1365911	KLiCdS2	119	10	0.959899	-0.0177747
311530	Na3Sc	225	16	0.959813	-0.0178135
443685	BaCa2Sn	225	16	0.959765	-0.017835
930491	SrInPb	216	12	0.959587	-0.0179156
545317	Sr2TlHg	225	16	0.95936	-0.0180183
444602	Ca2GaPd	225	16	0.959192	-0.0180943
314755	Sr3Ag	225	16	0.958779	-0.0182815
1493337	RbHfAgTe2S	11	12	0.958507	-0.0184048
1569375	Ba2PbS3	164	6	0.957771	-0.0187381
545219	Sr2HgPb	225	16	0.957721	-0.0187609
937528	AgSnTe	216	12	0.957142	-0.0190238
1033310	NaCaNiSb	216	16	0.957012	-0.0190828
1283676	In2SiSe4	227	56	0.957007	-0.0190847
1740663	Na2CdTeS4	5	16	0.95643	-0.0193468
864794	BaAlZn	216	12	0.956224	-0.0194405
568048	GaTePt	216	12	0.95615	-0.0194738
915183	ZnInAs	216	12	0.956041	-0.0195236
545561	NaSr2Sn	225	16	0.956032	-0.0195275
544130	Sr2AgAs	225	16	0.955976	-0.0195531
506727	CaMgAg2	225	16	0.955834	-0.0196174
443221	Ca2GaAu	225	16	0.955793	-0.0196363
343487	NaGa3	221	4	0.955726	-0.0196666
417361	Ba2AlZn	225	16	0.95556	-0.0197421
1511338	Na2ZrTeSe2	12	24	0.955378	-0.0198246
945431	YTlHg	216	12	0.955225	-0.0198942
844304	BaNaTe	216	12	0.955089	-0.0199563
948384	SrAlAu	216	12	0.95507	-0.0199646
1109319	Ba2CuAg	216	16	0.955016	-0.0199893
1369711	Ba2CdSb2	36	20	0.954877	-0.0200523
678359	CsTeO3	148	30	0.95485	-0.0200648
1725792	RbMnCl3	140	20	0.954716	-0.0201259
310699	Ca3Pd	225	16	0.954376	-0.0202804
914356	ZnGeSb	216	12	0.954326	-0.0203033
1551549	CsRbPtSe2	44	10	0.954311	-0.0203101
15959	Ba3SiI2	70	96	0.953983	-0.0204593
1348579	CsAgS	139	24	0.953949	-0.0204751
917514	SrSbPd	216	12	0.953841	-0.020524
1357741	RbHfAgSe3	62	24	0.953168	-0.0208305
789543	ScCuRhPb	216	16	0.952914	-0.0209464
468606	BaYPd2	225	16	0.952835	-0.0209823
995390	BaLiNiBi	216	16	0.952624	-0.0210786
544096	Sr2LiPb	225	16	0.952562	-0.021107
914422	BaAlZn	216	12	0.952412	-0.0211751
567329	InHgPt	216	12	0.952287	-0.021232
583480	SrZnAs	216	12	0.952141	-0.0212985
1243651	CsI	194	4	0.952105	-0.021315
1346058	Cs2Ag4S3	12	36	0.951863	-0.0214253
866882	BaGaGe	216	12	0.951694	-0.0215025
442933	Ca2NiAu	225	16	0.951378	-0.0216469
1430077	K2NaOsF6	225	40	0.951041	-0.0218007
1352379	ZrTlTe3Au	62	24	0.950392	-0.0220971
915326	ZnInGe	216	12	0.950384	-0.022101
364103	SrYPt2	225	16	0.950214	-0.0221785
442561	Ca2InPd	225	16	0.949877	-0.0223328
1441716	LiBr	63	8	0.949232	-0.0226276
545337	Sr2CaSn	225	16	0.949188	-0.0226479
1627842	Na2AlGaTe4	121	16	0.949079	-0.0226975
1505400	BaSrCdSb2	36	20	0.949036	-0.0227173
444937	Ca2CoPt	225	16	0.94885	-0.0228025
898807	AgSnPd	216	12	0.948844	-0.0228052
417507	Ba2ZnAs	225	16	0.948435	-0.0229924
344432	Ag3Ge	221	4	0.948267	-0.0230692
1554895	KNa3S2	115	6	0.947371	-0.0234799
1541264	K2LiZrF6	87	20	0.947316	-0.0235053
820653	CdNiSbRh	216	16	0.947097	-0.0236053
1755913	Cs2FeBr4	139	14	0.946892	-0.0236997
1441288	SrI2	139	6	0.946639	-0.0238154
948309	BaLiAu	216	12	0.946179	-0.0240265
1570934	Cs3I2Br	164	6	0.945583	-0.0243002
868824	KNaGe	216	12	0.945378	-0.0243945
898922	SnPdAu	216	12	0.94529	-0.024435
1612902	KNaAgSb	40	16	0.94528	-0.0244395
2582	CsBeF3	62	20	0.944825	-0.0246485
1254307	RbZrAuS3	63	24	0.944572	-0.0247648
1254257	RbHfAgSe3	63	24	0.944176	-0.0249468
12203	Cs3Mg2Cl7	139	24	0.943636	-0.0251955
844175	RbSrTe	216	12	0.943452	-0.02528
898299	KLiPd	216	12	0.94343	-0.0252901
454512	CaIn2Ir	225	16	0.943192	-0.0253998
443235	Ca2TlAu	225	16	0.94319	-0.0254007
543237	Sr2TlGa	225	16	0.943061	-0.0254603
900023	NaTePd	216	12	0.942909	-0.02553
10734	HfInAu2	225	16	0.942816	-0.0255731
786557	YTlCuNi	216	16	0.94268	-0.0256359
512638	CaScHg2	225	16	0.942625	-0.0256612
463580	AlGaPd2	225	16	0.942602	-0.0256717
1554236	Na2Mg2BiAs	99	6	0.942599	-0.0256728
1430629	Ba2LiMgF6	225	40	0.942553	-0.0256941
1441722	BaSe	63	8	0.94249	-0.0257231
864674	RbBaSb	216	12	0.941912	-0.0259896
953416	BaLiGa	216	12	0.941735	-0.0260714
1667239	K2NaRuF6	87	20	0.941497	-0.0261811
566853	InSbPt	216	12	0.941481	-0.0261885
819995	TlCdNiPd	216	16	0.940998	-0.0264111
1611876	SrAg2GeSeS3	1	8	0.940512	-0.0266354
1479677	RbCl	14	16	0.940337	-0.0267166
881244	KLiTe	216	12	0.940188	-0.0267853
468381	ScTlPd2	225	16	0.94004	-0.0268539
545385	Sr2RhAu	225	16	0.939842	-0.026945
1505300	BaSrCdBiSb	36	20	0.938945	-0.0273596
581523	KGaAs	216	12	0.938789	-0.0274319
1442679	K3BO3	155	21	0.938762	-0.0274444
583690	K2AgAs	20	16	0.938687	-0.0274794
1429199	Rb2ScTiSe6	225	40	0.938606	-0.0275167
24478	SrLiBS3	62	24	0.938574	-0.0275314
543238	Sr2NiAs	225	16	0.938105	-0.0277485
1257223	RbYZnTe3	63	24	0.938102	-0.0277499
1493134	KHfAgTeSe2	11	12	0.937964	-0.0278136
1479518	LiI	14	16	0.937592	-0.0279862
349738	AsPb3	221	4	0.937536	-0.028012
543733	Sr2CuGe	225	16	0.937241	-0.0281487
1283684	Li2MgCl4	227	56	0.93723	-0.0281539
1388438	Sr2GeS4	40	28	0.93699	-0.0282651
410814	Y2SiAg	225	16	0.936878	-0.0283169
1371567	KSrSb	129	6	0.936652	-0.0284217
1427673	ZrTlAgTe3	11	12	0.936625	-0.0284343
1257222	RbYZnSe3	63	24	0.936582	-0.0284542
1354777	KYZnSe3	12	24	0.936292	-0.0285889
1539843	Sr2HgP2	63	20	0.935969	-0.0287386
1474050	LiBr	139	8	0.93536	-0.029021
1256643	NaScCdSe3	63	24	0.935242	-0.0290762
1556096	KLiTe	160	9	0.935226	-0.0290834
411272	Y2AlAg	225	16	0.935067	-0.029157
1491949	BaSrCdAs2	36	20	0.934572	-0.0293873
1431873	ScTi(TlBr3)2	225	40	0.934544	-0.0294003
1753670	CsBeCl3	62	20	0.934392	-0.029471
442984	Ca2MgAg	225	16	0.934348	-0.0294916
1380925	KScZnSe3	11	12	0.934141	-0.0295876
924195	KBaSn	216	12	0.934045	-0.029632
914922	ZnSnSb	216	12	0.933754	-0.0297677
544781	Sr2GaCu	225	16	0.933412	-0.0299265
463446	HfTlPd2	225	16	0.933411	-0.0299273
1003699	CaHfMgPd	216	16	0.932938	-0.0301474
1489435	SrMgGe	62	12	0.932877	-0.0301756
469176	K2CaSb	225	16	0.932865	-0.0301812
444774	RbCa2Bi	225	16	0.932604	-0.0303028
1559737	KRbZnHgAs2	156	6	0.932321	-0.0304344
1735730	Cs2MoSe3	63	24	0.932129	-0.0305238
521562	NaCaGa2	225	16	0.93178	-0.0306867
1412797	Rb2Zr(AgS2)2	21	18	0.931642	-0.0307509
7600	Cs2NaAlF6	166	60	0.931601	-0.03077
1505425	BaSrMgSb2	36	20	0.931342	-0.0308907
545642	Sr2SiHg	225	16	0.931244	-0.0309365
521485	CaInGa2	225	16	0.93102	-0.0310409
1493189	RbHfAgTeSe2	11	12	0.93085	-0.0311204
444733	Ca2TeAu	225	16	0.930765	-0.03116
1352158	CsHfCuSe3	62	24	0.930311	-0.0313719
1372161	BaGe3Au	107	10	0.929815	-0.0316033
1505285	BaSrCdBi2	36	20	0.929675	-0.0316687
543160	Sr2ZnTe	225	16	0.929608	-0.0317
1391370	Cs2NaAlF6	225	40	0.92944	-0.0317787
545433	Sr2InIr	225	16	0.928809	-0.0320738
1514392	Cs2KAg3P2	166	24	0.928781	-0.0320865
1470375	Cs2FeTe2	72	20	0.92877	-0.0320917
1754064	SrSe2	15	12	0.928002	-0.032451
1430762	Cs2ZnInF6	225	40	0.927972	-0.032465
1376970	Sr2MgSb2	36	20	0.927861	-0.0325169
1479332	KBr	62	8	0.927439	-0.0327144
1344401	Ba(AgSe)2	62	20	0.927404	-0.0327312
444787	Ca2CdAu	225	16	0.927296	-0.0327814
819841	MgNiPdPb	216	16	0.92724	-0.0328078
493779	CaSn2Ir	225	16	0.926762	-0.0330319
1430171	K2LiAlF6	225	40	0.926557	-0.033128
1554412	K2Li2TeSe	99	6	0.926482	-0.033163
544614	Sr2GaSn	225	16	0.926264	-0.0332651
1555112	BaSeN	2	6	0.926041	-0.0333699
868090	CsBaGe	216	12	0.925915	-0.0334287
446066	RbLi2Pb	225	16	0.925861	-0.0334541
867196	KGePb	216	12	0.925671	-0.0335434
1549596	K2LiAlF6	225	40	0.925087	-0.0338175
942416	AlCdGe	216	12	0.924913	-0.0338993
311162	Sr3Ga	225	16	0.924706	-0.0339965
346157	YAu3	221	4	0.924605	-0.0340438
1267476	BaZn2Se3	63	24	0.92433	-0.034173
898304	YPdAu	216	12	0.924028	-0.0343149
1431226	Sr2H6OsPt	225	40	0.924007	-0.0343249
1443703	Rb2CO3	193	12	0.923775	-0.0344337
442663	Ca2AsAu	225	16	0.923548	-0.0345407
1445516	BaAgSb	189	9	0.923494	-0.0345658
1362491	CsFeCl3	63	20	0.923393	-0.0346136
951248	RbGaSn	216	12	0.923269	-0.0346718
912867	BaZnIn	216	12	0.922992	-0.0348022
1612967	KNaAgAs	38	16	0.922912	-0.0348398
444620	BaCa2Pt	225	16	0.922638	-0.0349686
417701	Ba2SbTe	225	16	0.922116	-0.0352147
545575	Sr2InGe	225	16	0.921848	-0.0353406
899679	SrScPd	216	12	0.921629	-0.0354437
1492289	CsMgBrCl2	63	20	0.92141	-0.0355469
1448168	BaNaBi	194	6	0.921354	-0.0355735
820558	YGaNiRh	216	16	0.921349	-0.0355757
26606	Ba11(CdSb2)6	12	58	0.920335	-0.0360538
14819	Na3YBr6	14	20	0.920288	-0.0360761
445836	Li2CaHg	225	16	0.920238	-0.0360996
1284407	NaTlS2	140	16	0.920138	-0.0361469
521847	Ga2NiPd	225	16	0.919628	-0.0363878
1554746	Na3LiSe2	115	6	0.919002	-0.0366838
899586	CdTePd	216	12	0.91858	-0.0368828
1432555	Cs2MgScCl6	225	40	0.918536	-0.0369038
567361	CsBaPt	216	12	0.918252	-0.037038
522399	SrInGa2	225	16	0.917777	-0.0372627
1615344	KRb(Li2Bi)2	25	8	0.917644	-0.0373257
789673	MgCuRhPb	216	16	0.917615	-0.0373396
543754	Sr2ZnAs	225	16	0.917597	-0.0373479
1745611	MgTl2F4	139	14	0.917472	-0.0374071
925046	KInSn	216	12	0.915873	-0.0381648
822729	YMgNiPb	216	16	0.915678	-0.0382573
545456	Sr2GaAs	225	16	0.915456	-0.0383624
13141	Na2ZnBr4	62	28	0.915385	-0.0383962
1729645	CsAgF3	123	10	0.915242	-0.038464
943809	BaScHg	216	12	0.91503	-0.0385646
79591	Ba3GeI2	70	96	0.914429	-0.0388501
680738	RbPbO3	99	5	0.913195	-0.0394366
1545221	BaSr(AgAs)2	164	6	0.913122	-0.0394711
1609203	KNaAgSb	38	16	0.91252	-0.0397577
1373227	K3Ag3Sb2	166	24	0.912478	-0.0397774
1562369	KRb(SbPb)2	156	6	0.912239	-0.0398915
544795	Sr2MgSb	225	16	0.912232	-0.0398946
1554737	KLiSe	131	6	0.912187	-0.039916
1016088	Ba2SrCa	216	16	0.911806	-0.0400974
1652818	SrCaS6	5	16	0.911642	-0.0401757
521278	BaZnGa2	225	16	0.911583	-0.0402036
1505281	Ba2CdBiSb	36	20	0.911041	-0.0404623
898066	GaSbPd	216	12	0.910796	-0.040579
1513251	CsK2BP2	15	24	0.909776	-0.0410657
1529826	KLiTe	62	12	0.909482	-0.0412058
579244	RbInSi	216	12	0.909474	-0.0412098
417034	Ba2NaAl	225	16	0.909206	-0.0413379
1367867	RbHfAgSe3	11	12	0.909018	-0.0414275
1553742	CsK(LiTe)2	99	6	0.908566	-0.0416433
1553458	K2MgCdAs2	115	6	0.908371	-0.0417366
545659	Sr2SiRh	225	16	0.908328	-0.0417573
1254032	KHfAgSe3	63	24	0.908121	-0.0418565
1431815	ScTi(TlBr3)2	225	40	0.908075	-0.0418785
1531315	RbBaCu3	188	10	0.908046	-0.0418921
543743	Sr2TlSn	225	16	0.907947	-0.0419395
517307	LiBeAu2	225	16	0.907571	-0.0421195
1370393	Ba(GaSe2)2	97	14	0.907486	-0.0421598
566940	CdSiPt	216	12	0.90736	-0.0422204
1376082	RbSbPb	186	6	0.907183	-0.042305
582631	BaZnAs	216	12	0.907119	-0.042336
1377465	Ba2AsI	166	12	0.906763	-0.0425061
938249	AgSnAs	216	12	0.90581	-0.042963
897835	TlAgPd	216	12	0.905577	-0.0430746
995604	LiZnNiBi	216	16	0.905412	-0.0431535
566462	InPtPb	216	12	0.905302	-0.0432067
1358362	KScZnSe3	62	24	0.905222	-0.0432447
953159	KInGa	216	12	0.904663	-0.0435131
937442	ZnInAg	216	12	0.904165	-0.0437525
1011230	YBeInPt	216	16	0.903964	-0.0438488
346098	Pb3S	221	4	0.903426	-0.0441073
789647	HfCuRhPb	216	16	0.902886	-0.0443669
545489	Sr2TlIn	225	16	0.902716	-0.0444488
409955	Y2HgGe	225	16	0.902412	-0.0445951
373145	SrAlTl2	225	16	0.902297	-0.0446507
1348268	Ba3(BiSe3)2	12	44	0.902286	-0.0446559
1754784	BaPdSe3	194	10	0.902102	-0.0447442
1376852	K3GaSb2	72	24	0.901799	-0.0448902
1609208	KNaAgSb	11	8	0.901609	-0.0449818
345969	CsBa3	221	4	0.901478	-0.0450451
337147	RbBr	123	2	0.901321	-0.0451204
1667228	K2NaMgF6	87	20	0.900446	-0.0455423
444159	BaCa2Pb	225	16	0.900323	-0.0456018
1498526	Ba3Na3SbAs2	189	9	0.900096	-0.045711
1723834	KNiCl3	140	20	0.899887	-0.045812
544293	Sr2GaBi	225	16	0.899633	-0.0459345
1510125	Cs2Ni(PtSe2)2	69	36	0.899455	-0.0460204
1722862	B2TePbO6	148	30	0.899415	-0.0460397
544680	Sr2CuSn	225	16	0.899344	-0.0460744
1612904	K3Na(AgSb)2	6	8	0.899197	-0.0461451
544485	Sr2TlCd	225	16	0.899041	-0.0462204
1482129	Sr3LiRh	63	20	0.898718	-0.0463766
1277186	BaSi(AgSe2)2	121	16	0.898552	-0.0464566
443858	Ca2GaPt	225	16	0.898505	-0.0464794
1609204	RbNaAgSb	40	16	0.898327	-0.0465657
314215	SrIn3	225	16	0.898195	-0.0466296
4623	Ba(GaSe2)2	66	28	0.898109	-0.0466707
520381	CaGa2Ni	225	16	0.897995	-0.0467262
1388642	SrAgTeF	129	8	0.89774	-0.0468493
795708	MgCuSiIr	216	16	0.897468	-0.0469812
1570646	Rb3ICl2	164	6	0.897327	-0.0470493
554252	SrYCd2	225	16	0.897319	-0.0470531
1491950	BaSrCdSbAs	36	20	0.897145	-0.0471374
1611837	BaSiAg2Se3S	1	8	0.896843	-0.0472835
13443	CsBO2	167	72	0.896563	-0.0474192
443345	NaCa2Pd	225	16	0.896467	-0.0474656
14368	RbBS2	167	72	0.896148	-0.0476204
923696	CdInSn	216	12	0.895185	-0.0480871
1376250	SrMgGa3	119	10	0.895077	-0.0481394
544363	Sr2GaHg	225	16	0.894908	-0.0482217
1255418	SrYAuSe3	63	24	0.894893	-0.0482289
544658	Sr2CdBi	225	16	0.894804	-0.0482721
1238507	PI2	227	24	0.894757	-0.048295
1493693	RbScZnTe2Se	63	24	0.894683	-0.0483308
1561152	K4TeSe	123	6	0.894157	-0.0485863
1723872	RbMnCl3	221	5	0.894016	-0.0486545
1032371	NaZnNiAs	216	16	0.893946	-0.0486886
582617	TlGeAs	216	12	0.893765	-0.0487765
998697	AlCuSiPd	216	16	0.893656	-0.0488298
1441704	KF	63	8	0.892915	-0.04919
444044	Ca2AgPb	225	16	0.892801	-0.0492453
373054	CaTl2Pb	225	16	0.892765	-0.0492626
1412203	Cs2NaAlF6	225	40	0.892072	-0.0495999
1587425	Ba2SiSe3S	11	14	0.892071	-0.0496006
995601	SrLiNiBi	216	16	0.891969	-0.0496501
1432534	Cs2YMgCl6	225	40	0.891388	-0.0499332
827031	SrOsO3	167	30	0.89114	-0.0500541
582611	NaZnAs	216	12	0.890989	-0.0501274
1003664	CaHfMgPt	216	16	0.890662	-0.0502871
15721	Ba2CdTe3	62	24	0.890577	-0.0503284
1440019	CsF	62	8	0.890525	-0.050354
445624	SrLi2Bi	225	16	0.89041	-0.0504099
945230	NaHgPb	216	12	0.890407	-0.0504114
1740262	K2BaMgSb2	26	12	0.890356	-0.0504364
1369021	K2MgSn	63	16	0.88955	-0.0508296
794908	MgGaCuAg	216	16	0.88907	-0.0510641
442935	BaCa2Bi	225	16	0.888806	-0.051193
1366402	K2ZnGe	63	16	0.888365	-0.0514083
947028	SiPbAu	216	12	0.887603	-0.0517811
1386823	Cs2SnP2	72	20	0.887497	-0.051833
312175	Na3Y	225	16	0.887426	-0.0518679
444969	Ca2CuPt	225	16	0.88724	-0.0519587
59160	Cs2MnTe2	72	20	0.887082	-0.052036
1445765	BaCaSn	189	9	0.887009	-0.0520722
343368	Na3Al	221	4	0.886984	-0.0520843
1408665	Ba2Cd(SeF)2	115	7	0.88691	-0.0521202
1673729	BaNa3Sr2BiSb2	38	18	0.886623	-0.0522608
544317	Sr2ZnRh	225	16	0.886388	-0.0523759
1381158	CsScZnSe3	11	12	0.88618	-0.0524782
1548380	BaCaSbI	160	12	0.886132	-0.0525018
1256886	KYZnSe3	63	24	0.885826	-0.0526514
579528	TlSiSn	216	12	0.885721	-0.052703
887346	RbInSn	216	12	0.885497	-0.0528127
443545	Ca2InPt	225	16	0.885394	-0.0528632
442495	BaCa2In	225	16	0.885322	-0.0528986
789734	YInCuRh	216	16	0.884884	-0.0531135
1017975	Sr2HgPb	59	8	0.884607	-0.0532498
1096696	CsBaAsO	26	8	0.884517	-0.0532938
1346176	Rb2Zn3Se4	72	36	0.884383	-0.0533595
582886	CdGeAs	216	12	0.884347	-0.0533771
1035592	NaSrNiSb	216	16	0.884225	-0.0534373
442820	SrCa2Pt	225	16	0.884209	-0.0534451
828310	AsPdPt	216	12	0.883789	-0.0536514
1016604	SrCa2Hg	216	16	0.883085	-0.0539977
948154	SnSbAu	216	12	0.883041	-0.054019
1372947	Rb3Ag3Bi2	166	24	0.883013	-0.0540329
924114	RbSnPb	216	12	0.88278	-0.0541477
1481991	KSrSb	62	12	0.882279	-0.0543943
1372887	CaS3	41	16	0.882177	-0.0544442
581277	TlInSi	216	12	0.881969	-0.0545466
545014	Sr2AlTe	225	16	0.881821	-0.0546196
1750762	CsAlCl4	189	18	0.881581	-0.0547377
1276747	KNiCl3	62	20	0.881069	-0.0549901
26910	KSr2Cd2Sb3	62	32	0.881036	-0.0550065
1430189	K2LiScF6	225	40	0.88102	-0.0550145
14873	Cs2CaF4	139	14	0.881019	-0.0550146
1481270	SrCa3Pt	65	20	0.880726	-0.0551592
482682	SrYZn2	225	16	0.880317	-0.0553607
1429236	Rb2HfTiSe6	225	40	0.88023	-0.0554037
952884	NaGaPb	216	12	0.88016	-0.0554382
917406	SbTePb	216	12	0.879661	-0.0556847
1382672	Cs3AlO3	12	28	0.87966	-0.0556852
996904	LiInNiGe	216	16	0.87883	-0.0560953
1446766	BaAgBi	189	9	0.878787	-0.0561162
1357955	RbYCdTe3	62	24	0.87862	-0.0561989
1018017	Sr2SnHg	59	8	0.878409	-0.0563031
1430205	K2LiGaF6	225	40	0.878365	-0.056325
567660	CdAsPt	216	12	0.878214	-0.0563996
1493384	ZrTlAgTeSe2	11	12	0.878168	-0.0564223
1513519	K2Na2ZnP2	166	21	0.878091	-0.0564604
545310	Sr2CaPb	225	16	0.878027	-0.0564923
544034	Sr2CdIr	225	16	0.877664	-0.0566715
868816	KInGe	216	12	0.877108	-0.0569467
444947	Ca2ScAu	225	16	0.877043	-0.0569791
418886	Ba2ZnCd	225	16	0.876731	-0.0571339
1347558	CsAlTe2	15	64	0.876707	-0.0571454
581800	RbInAs	216	12	0.876504	-0.0572461
1753154	Ba2As2Pb	36	20	0.876023	-0.0574847
795850	AlCdCuIr	216	16	0.87535	-0.0578181
1430649	MgTl2CuF6	225	40	0.875175	-0.0579053
544860	Sr2MgBi	225	16	0.875149	-0.0579179
582880	SnAsPb	216	12	0.875128	-0.0579285
899019	GaSnPd	216	12	0.874393	-0.0582935
582744	RbGaAs	216	12	0.874387	-0.0582962
763089	YCuNiPb	216	16	0.874206	-0.0583862
442591	Ca2BeAu	225	16	0.874102	-0.0584381
1505301	BaSrCdBiAs	36	20	0.874086	-0.0584457
1347941	Na2CdCl4	62	28	0.874074	-0.0584516
997702	LiMgSbPt	216	16	0.873865	-0.0585558
1357623	ZrTlAgTe3	62	24	0.87362	-0.0586772
868880	SrZnGe	216	12	0.872795	-0.0590876
444796	Ca2AgGe	225	16	0.872614	-0.0591779
544336	Sr2LiSb	225	16	0.872445	-0.0592618
820561	YInNiRh	216	16	0.872415	-0.0592769
1544722	Rb2ClF	123	4	0.872379	-0.0592947
898173	NaGaPd	216	12	0.872185	-0.0593912
417241	RbBa2Sb	225	16	0.872101	-0.0594332
1556355	CsAg3SeS	156	6	0.871923	-0.0595218
13139	Li2ZnCl4	62	28	0.871531	-0.0597171
1239413	Rb2Pt	227	24	0.87137	-0.0597974
1575358	K2TiNiBr6	225	40	0.871059	-0.0599527
521704	CaGa2Rh	225	16	0.870756	-0.0601036
1016094	Ba2CaSb	216	16	0.870551	-0.0602057
543693	Sr2LiSn	225	16	0.869973	-0.0604941
517377	NaCdAu2	225	16	0.869955	-0.0605032
646233	CsCaF3	221	5	0.869516	-0.0607226
1386246	Na2PdCl4	64	28	0.869513	-0.0607237
566636	RbNaPt	216	12	0.869434	-0.0607632
923409	RbSrSn	216	12	0.869381	-0.0607897
1348884	Cs2Te2O7	14	22	0.869061	-0.0609496
1346047	Rb2SeO4	70	56	0.869056	-0.0609523
543853	Sr2LiGa	225	16	0.869054	-0.0609533
1343199	CsF	129	4	0.868825	-0.0610677
938186	InAgAs	216	12	0.86825	-0.0613551
25141	K4ZnAs2	166	21	0.868004	-0.0614782
308951	CsSr3	225	16	0.867722	-0.0616195
1432557	Cs2YMgCl6	225	40	0.86727	-0.0618458
417468	Ba2CdIn	225	16	0.867181	-0.0618904
582157	BaAsAu	216	12	0.866931	-0.0620154
1386486	CsCaF3	99	5	0.866728	-0.0621174
308020	Ba3Si	225	16	0.866453	-0.0622552
581001	SiHgPb	216	12	0.866411	-0.062276
1493545	CsYZnTeS2	63	24	0.86641	-0.0622764
497352	ScRhPb2	225	16	0.866131	-0.0624165
984711	BaScCd	216	12	0.865929	-0.0625176
1431880	ScTl2FeBr6	225	40	0.865844	-0.0625605
1013981	Ca2AsAu	71	8	0.865747	-0.062609
24730	Li2ZnCl4	227	56	0.865337	-0.0628146
948025	LiTeAu	216	12	0.865143	-0.0629121
1493698	RbYZnTeSe2	63	24	0.864779	-0.0630949
947674	KAgAu	216	12	0.864004	-0.0634842
567218	SrTePt	216	12	0.8634	-0.0637882
1474979	K5Sb2I	166	24	0.862496	-0.064243
1505279	Ba2CdBiAs	36	20	0.862411	-0.0642857
1430552	Rb2LiZrF6	225	40	0.862225	-0.0643792
1496784	Na3Sr3BiSb2	189	9	0.862071	-0.0644571
1257650	CsScCdS3	63	24	0.861753	-0.0646173
445394	KLi2Pb	225	16	0.86174	-0.0646238
1482953	BaSr3Pd	107	10	0.861112	-0.0649405
1368422	Sr2MgBi2	36	20	0.861002	-0.064996
1431816	ScMn(TlBr3)2	225	40	0.860057	-0.0654726
1609897	SrLiAgGeS4	82	16	0.859732	-0.0656367
1482664	RbSr3Pd	47	5	0.859467	-0.0657708
937902	KAlAg	216	12	0.859039	-0.0659873
819711	ScNiPdPb	216	16	0.858645	-0.0661862
1257653	CsYCdS3	63	24	0.857929	-0.0665487
348869	Sr3Sc	221	4	0.857744	-0.0666421
21608	CsYZnTe3	63	24	0.857532	-0.0667495
545345	Sr2InCu	225	16	0.857169	-0.0669338
468095	GaCuPd2	225	16	0.856759	-0.0671411
444550	Ca2HgPd	225	16	0.856737	-0.0671522
1542707	Sr2H6PtAu	225	40	0.856551	-0.0672467
443968	Ca2CuAu	225	16	0.856487	-0.0672794
1436556	NaPbClF2	63	20	0.856299	-0.0673743
312217	BaZn3	225	16	0.856202	-0.0674236
1482262	BaNaAs	62	12	0.856168	-0.0674409
1506621	KNCl2	166	12	0.856153	-0.0674489
986613	BaYCd	216	12	0.856016	-0.0675181
1368066	BaSi(AgSe2)2	23	16	0.856005	-0.0675238
915313	NaZnSn	216	12	0.855659	-0.0676993
1115303	Ba2InNi	216	16	0.855618	-0.0677199
1758735	BaPbS3	62	20	0.855515	-0.0677723
1733131	TlNiCl3	194	10	0.855244	-0.0679098
417708	Ba2PtAu	225	16	0.855219	-0.0679229
1553106	KRbNa2S2	99	6	0.85513	-0.0679677
1430355	Rb2NaOsF6	225	40	0.85504	-0.0680136
1374738	Rb2HfTe3	63	24	0.855009	-0.0680295
867618	CsInGe	216	12	0.854959	-0.0680549
1730842	CsPdF3	140	20	0.854245	-0.0684178
442521	KCa2Pd	225	16	0.853921	-0.0685823
543356	Sr2TlIr	225	16	0.85375	-0.0686691
952528	InGaSn	216	12	0.85324	-0.0689287
1708392	K2LiScF6	225	40	0.852357	-0.0693785
1721066	CsAgF3	12	20	0.852316	-0.0693995
444242	NaCa2Pt	225	16	0.852307	-0.0694038
1741644	Ba2CdAs2	72	20	0.851792	-0.0696665
1514381	K2RbAg3Sb2	166	24	0.851378	-0.0698774
1558770	K3RbLi2(BO3)2	5	28	0.851273	-0.0699314
766028	LiCdCoBi	216	16	0.851044	-0.0700482
1493470	CsScZnTe2S	63	24	0.850516	-0.0703174
543549	Sr2NiAu	225	16	0.850443	-0.0703547
913449	LiZnSn	216	12	0.850235	-0.0704609
938363	NaAgTe	216	12	0.850022	-0.0705698
1358596	CsScZnTe3	62	24	0.850008	-0.070577
543659	Sr2GaSb	225	16	0.849811	-0.0706775
1476173	K4SrP2	166	21	0.849753	-0.0707074
417142	Ba2CaCd	225	16	0.849671	-0.070749
1372922	K3InAs2	72	24	0.849452	-0.0708611
1505349	Ba2CdSbAs	36	20	0.84937	-0.0709029
985607	KCdSn	216	12	0.849285	-0.0709467
1357583	KHfAgSe3	62	24	0.849231	-0.0709741
1741623	Rb2FeSe2	72	20	0.849013	-0.0710856
418248	Ba2ZnSn	225	16	0.848974	-0.0711054
937642	SrLiAg	216	12	0.848869	-0.0711592
913072	SrZnSb	216	12	0.848624	-0.0712845
1710531	Cs2NaAlF6	225	40	0.848192	-0.0715058
1403514	Cs2NaAlF6	225	40	0.848189	-0.0715073
995696	LiCaBiPd	216	16	0.848039	-0.0715841
681596	CsTeO3	62	20	0.847791	-0.071711
1522837	K2RbInP2	72	24	0.847778	-0.0717179
569847	KNaSn	216	12	0.847371	-0.0719265
1706056	Na3ScBr6	14	20	0.847307	-0.0719591
336353	RbCl	123	2	0.847301	-0.0719625
1110877	Ca2InCu	216	16	0.847061	-0.0720853
26907	KBa2Cd2Sb3	62	32	0.846943	-0.0721457
468264	CuSiPd2	225	16	0.846863	-0.072187
580708	BaTlSi	216	12	0.846774	-0.0722322
998083	SrLiNiSb	216	16	0.846445	-0.072401
795659	BeCuGeIr	216	16	0.846411	-0.0724187
1227916	KAg	187	2	0.846333	-0.0724585
1022870	ScBeZnAu	216	16	0.846237	-0.0725078
544752	Sr2NiPt	225	16	0.84612	-0.072568
1351020	SrInAgSe3	63	24	0.846045	-0.0726064
418614	Ba2CdSb	225	16	0.846008	-0.0726253
411159	Y2MgNi	225	16	0.845715	-0.072776
1502641	BaSeS2	113	8	0.845549	-0.072861
946664	BaGeAu	216	12	0.845537	-0.0728672
1708236	Cs2KFeF6	139	20	0.845057	-0.0731138
1388004	Ba2SiSe4	40	28	0.844952	-0.073168
1729646	CsBeF3	127	10	0.844778	-0.0732574
1354893	RbYZnSe3	12	24	0.844691	-0.073302
1401140	K4Mg(ClO)2	12	18	0.844584	-0.0733574
1358595	CsScZnSe3	62	24	0.844557	-0.0733712
1711683	K2NaPF6	225	40	0.844272	-0.0735178
898345	CdSiPd	216	12	0.843858	-0.0737306
1745168	Ba2HgAs2	72	20	0.843741	-0.0737908
1547462	BaCd2AsP	156	5	0.843698	-0.0738128
1751988	Ge(PbSe2)2	82	14	0.84362	-0.0738531
1377092	CsLiZnSe2	119	10	0.842888	-0.07423
418445	Ba2ZnIn	225	16	0.842652	-0.0743517
1357954	RbScCdTe3	62	24	0.842484	-0.0744385
1735190	Na3IrCl6	163	20	0.842244	-0.0745619
1363582	K3NaO2	72	24	0.84214	-0.0746156
346997	Ca3Au	221	4	0.841442	-0.0749757
942652	BaAlPb	216	12	0.841433	-0.0749804
543697	Sr2InGa	225	16	0.841166	-0.0751184
1431863	ScMn(TlBr3)2	225	40	0.841155	-0.0751239
1505594	BaSrHgAs2	36	20	0.840965	-0.0752221
894091	BaIrPb	216	12	0.840867	-0.0752725
882087	NaLiSn	216	12	0.840761	-0.0753274
493740	NaSn2Pt	225	16	0.840062	-0.0756885
1554878	K3RbS2	115	6	0.840034	-0.075703
947730	AlPbAu	216	12	0.839365	-0.076049
1553478	Cs2MgCdP2	115	6	0.839274	-0.0760961
580148	GaSiHg	216	12	0.838887	-0.0762967
543863	Sr2HgGe	225	16	0.838854	-0.0763134
545472	Sr2MgGa	225	16	0.838671	-0.0764081
463461	LiAsPd2	225	16	0.838649	-0.0764199
951929	InGaSb	216	12	0.838443	-0.0765264
418748	Ba2CdSn	225	16	0.838142	-0.0766824
1552724	K2MgCdSb2	115	6	0.838093	-0.0767079
463210	BaScPd2	225	16	0.837967	-0.0767732
946833	BaTeAu	216	12	0.837472	-0.0770299
471327	K2GaAs	225	16	0.837395	-0.0770697
543902	NaSr2Ge	225	16	0.837268	-0.0771354
1562082	Rb2SnBi2Pb	156	6	0.836794	-0.0773815
468312	CdSnPd2	225	16	0.836768	-0.0773951
445795	Li2TlAu	225	16	0.836724	-0.077418
1570867	K3I2F	164	6	0.836522	-0.0775226
1505348	Ba2CdAsP	36	20	0.836319	-0.0776282
1553454	K2CaCdAs2	115	6	0.836038	-0.0777738
417654	Ba2IrPt	225	16	0.835871	-0.0778608
347859	Ag3Pb	221	4	0.835786	-0.0779047
938157	SrAlAg	216	12	0.835699	-0.0779503
1443310	NaBr	191	2	0.835617	-0.0779926
1343651	Ba2Ge	62	12	0.835425	-0.0780927
1647792	K2ICl	11	8	0.835185	-0.0782173
948134	KAlAu	216	12	0.835133	-0.0782442
936700	AgSbTe	216	12	0.835101	-0.0782612
516299	ZrBeAu2	225	16	0.835095	-0.078264
947756	SnTeAu	216	12	0.835019	-0.0783038
545104	Sr2CuHg	225	16	0.834795	-0.07842
791878	YInCuHg	216	16	0.834485	-0.0785814
937185	NaSrAg	216	12	0.834422	-0.0786144
1493193	RbHfAgTe2Se	11	12	0.834354	-0.0786499
1117353	Sr2CaSc	216	16	0.833793	-0.0789418
4222	CsAgF3	140	20	0.833187	-0.0792578
1586997	Ba2Cd2Sb2As	12	28	0.832285	-0.0797278
444558	Ca2BePt	225	16	0.832175	-0.0797851
1472539	K2O	72	12	0.832156	-0.0797955
880376	LiInSb	216	12	0.832001	-0.0798762
844309	RbBaTe	216	12	0.831935	-0.0799108
953653	NaGaSn	216	12	0.831773	-0.0799949
1255415	SrScAuSe3	63	24	0.831683	-0.0800422
453469	BaMgIn2	225	16	0.83158	-0.0800959
411503	Y2AgGe	225	16	0.831284	-0.0802504
445145	SrLi2Tl	225	16	0.830492	-0.0806646
512970	LiHg2As	225	16	0.830476	-0.0806728
775398	YCoCuSn	216	16	0.830426	-0.080699
345566	Ag3Br	221	4	0.830307	-0.0807615
25506	Ba(BSe3)2	64	36	0.829569	-0.0811473
924755	BaSnPb	216	12	0.829563	-0.0811508
1481951	KSrAs	62	12	0.828991	-0.08145
1227899	CsAg	187	2	0.828697	-0.0816042
1609211	KRbAgSb	38	16	0.828555	-0.0816784
1647832	Cs2IBr	11	8	0.828501	-0.0817069
945583	KAlHg	216	12	0.827818	-0.0820653
545178	Sr2CuTe	225	16	0.827783	-0.0820836
1345428	K2ZnO2	60	20	0.827638	-0.0821597
1493131	KHfAgTe2Se	11	12	0.827404	-0.0822825
1022861	YBeZnAu	216	16	0.827393	-0.0822883
1739962	BaAg2TeS4	23	16	0.827286	-0.0823441
1493105	KZrAgTeSeS	11	12	0.827255	-0.0823605
646413	Ba2SiSe4	11	14	0.827067	-0.0824593
1554861	K4SO	123	6	0.827051	-0.0824678
1547059	Cs2NaAlCl6	225	40	0.826465	-0.0827754
1357726	KZrAgTe3	62	24	0.826459	-0.0827785
951617	BaCdGa	216	12	0.826368	-0.0828267
1052332	BaZnTeO	19	16	0.826205	-0.0829121
347831	Pb3Se	221	4	0.826143	-0.0829446
1399044	Cs2AlTlF6	225	40	0.825501	-0.0832822
1022872	CaScBeAu	216	16	0.824992	-0.0835505
305199	KSe	221	2	0.824986	-0.0835535
1255895	ScCuPbSe3	63	24	0.824872	-0.0836134
1371035	K2ZnSe2	72	20	0.824683	-0.0837129
580108	InSiHg	216	12	0.824671	-0.0837195
308308	Ca3Pt	225	16	0.824641	-0.0837353
469513	K2LiAs	225	16	0.824415	-0.083854
976023	SrHgTe	216	12	0.824398	-0.0838632
763562	LiCdCuPb	216	16	0.824117	-0.0840112
1346069	Rb2Cd3S4	72	36	0.824073	-0.0840345
1611873	BaAg2Sn(SeS)2	5	16	0.823627	-0.0842697
418347	Ba2AlCd	225	16	0.823611	-0.084278
936143	BaScAg	216	12	0.823215	-0.0844869
1748923	Na2ZnCdSb2	26	12	0.822898	-0.0846541
1757345	KSbSe2	194	8	0.822882	-0.0846626
789664	MgCuSiRh	216	16	0.822815	-0.0846978
1611868	BaAg2Ge(SeS)2	5	16	0.822768	-0.0847226
1403338	Cs2NaYF6	225	40	0.822528	-0.0848492
567655	SrSnPt	216	12	0.822513	-0.0848574
913648	ZnInTe	216	12	0.822158	-0.0850445
24651	Na3ScBr6	15	40	0.82183	-0.0852178
505674	SrYAg2	225	16	0.82109	-0.0856093
941432	RbBaAl	216	12	0.820709	-0.085811
1450797	Sr2Se3	9	20	0.820614	-0.0858612
545397	NaSr2Rh	225	16	0.820293	-0.086031
1552332	CsRbPdSe2	44	10	0.820284	-0.086036
947184	SrTeAu	216	12	0.819494	-0.0864541
789000	MgCuSbPd	216	16	0.819436	-0.0864852
819839	MgNiSbPd	216	16	0.819349	-0.0865311
936846	LiAgPb	216	12	0.819203	-0.0866084
1234425	Rb2S	136	6	0.81915	-0.0866368
1709012	Cs2AlTlF6	225	40	0.819149	-0.0866372
937417	BaAlAg	216	12	0.819046	-0.0866918
1234817	CsAu	166	6	0.818895	-0.0867716
899054	SrSnPd	216	12	0.817618	-0.0874497
898733	InHgPd	216	12	0.817486	-0.0875195
1552333	CsKPdSe2	44	10	0.817359	-0.087587
1753857	RbInSe2	166	12	0.817284	-0.0876268
1357596	RbHfTe3Au	62	24	0.817219	-0.0876616
515867	NaInAu2	225	16	0.816755	-0.087908
568439	YHgPt	216	12	0.816737	-0.0879176
545097	Sr2NiSn	225	16	0.816554	-0.0880153
416902	Ba2ZnSb	225	16	0.816518	-0.0880345
345047	Bi3Se	221	4	0.81623	-0.0881876
1611833	SrAg2Sn(SeS)2	5	16	0.816119	-0.0882465
544263	Sr2HgAs	225	16	0.815835	-0.0883975
845541	NaTePb	216	12	0.815823	-0.0884041
1255562	BaYAuSe3	63	24	0.815617	-0.0885135
567630	SrAgPt	216	12	0.815561	-0.0885433
952846	BaGaSb	216	12	0.81545	-0.0886028
898577	RbAgPd	216	12	0.815309	-0.0886778
418088	Ba2NaSb	225	16	0.814471	-0.0891243
1352365	CsZrCuTe3	62	24	0.814174	-0.0892829
545431	Sr2InAs	225	16	0.813523	-0.0896303
380873	As2PdPt	225	16	0.813493	-0.089646
1546137	K2ZnHgSb2	187	6	0.813074	-0.0898697
544779	Sr2SnTe	225	16	0.813056	-0.0898794
681532	CsOsO3	62	20	0.812884	-0.0899715
443776	Ca2AgSn	225	16	0.812575	-0.0901367
1111139	SrIn2Cu	216	16	0.812467	-0.0901941
952959	KGaSb	216	12	0.812328	-0.0902688
1501715	K3Te2Se	189	12	0.812254	-0.0903081
1397815	BaAgSeF	129	8	0.810891	-0.0910376
1740897	K2InF5	123	8	0.810849	-0.0910598
1554865	KRb3S2	115	6	0.810672	-0.0911546
1587720	Sr2Sn(SeS)2	40	28	0.810581	-0.0912037
744750	BeCu2Pt	216	16	0.810557	-0.0912163
1257219	RbScZnSe3	63	24	0.810509	-0.0912419
936641	KLiAg	216	12	0.810453	-0.0912719
1610467	K3Na2LiAs2	156	8	0.810453	-0.0912721
1554908	Rb4SO	123	6	0.810123	-0.0914488
1253957	KHfCuSe3	63	24	0.810029	-0.0914994
469804	K2CaBi	225	16	0.809946	-0.0915439
446194	Li2HgAs	225	16	0.809631	-0.0917126
795574	ScCuIrPb	216	16	0.809588	-0.0917358
349758	Pb3Cl	221	4	0.809484	-0.0917915
344322	CdGa3	221	4	0.809461	-0.0918043
1021678	CaTiAgAu	216	16	0.809349	-0.0918644
13931	K6Na3GaSb4	194	28	0.809269	-0.0919068
867922	AgGePd	216	12	0.808626	-0.0922522
582333	NaInAs	216	12	0.808539	-0.0922989
543209	Sr2BeAu	225	16	0.807632	-0.0927866
1613038	CsKAgP	40	16	0.806921	-0.093169
411510	Y2HgAu	225	16	0.806762	-0.0932548
544572	Sr2NiHg	225	16	0.806747	-0.0932626
1371347	KRb2InP2	72	24	0.806604	-0.0933395
348545	LiTl3	221	4	0.806314	-0.093496
1609266	CsK3(AgAs)2	6	8	0.805444	-0.0939649
1370312	KRb2GaAs2	72	24	0.80533	-0.094026
937400	AgTeAs	216	12	0.805303	-0.0940409
580569	BaSiPb	216	12	0.805182	-0.0941059
947867	SrLiAu	216	12	0.805134	-0.0941319
945986	NaSnHg	216	12	0.805085	-0.0941581
545107	Sr2GaRh	225	16	0.804866	-0.0942767
454019	BaSrIn2	225	16	0.804837	-0.0942919
545398	RbSr2Bi	225	16	0.804821	-0.0943005
879639	BaLiIn	216	12	0.804678	-0.094378
1376369	K2MgTe2	72	20	0.80446	-0.0944956
513583	YCdHg2	225	16	0.804052	-0.0947159
444626	Ca2BiAu	225	16	0.803766	-0.0948703
881330	NaLiPb	216	12	0.802878	-0.0953504
947576	GeSbAu	216	12	0.801894	-0.0958831
545612	Sr2CuAg	225	16	0.801629	-0.0960263
1035731	NaSnRhPb	216	16	0.800876	-0.0964347
343025	ZnBi3	221	4	0.800691	-0.0965348
1753379	RbMnCl3	11	10	0.800353	-0.0967185
1514363	KRb2Ag3Bi2	166	24	0.80016	-0.0968232
545259	Sr2PdAu	225	16	0.800006	-0.0969066
1553508	Cs2MgCdAs2	115	6	0.799903	-0.0969628
1490709	CsHfAgTeSe2	11	12	0.799779	-0.09703
795778	YInCuIr	216	16	0.799622	-0.0971154
898621	SrTePd	216	12	0.799599	-0.0971278
1431821	ScTl2CoBr6	225	40	0.799487	-0.0971884
1364208	Ba(AgSe)2	139	10	0.799444	-0.0972121
417571	Ba2PtRh	225	16	0.799305	-0.0972874
579339	GaSiPb	216	12	0.799218	-0.0973347
521985	SrCdGa2	225	16	0.799118	-0.0973892
1343232	Na2Se	19	12	0.798827	-0.0975475
941427	BaNaAl	216	12	0.798501	-0.0977247
828152	TlTeAs	216	12	0.79822	-0.0978771
1344645	CsBS2	166	72	0.798104	-0.0979408
1609657	BaAg2GeSe3S	8	16	0.797633	-0.0981968
506071	BaSrAg2	225	16	0.79756	-0.0982366
1374584	K2NaTlAs2	72	24	0.797498	-0.0982706
1482128	Sr3LiPd	2	10	0.797401	-0.098323
545032	Sr2HgIr	225	16	0.797327	-0.0983637
947140	RbAgAu	216	12	0.797256	-0.098402
1481973	KInSb	2	6	0.797073	-0.0985021
1490689	K4NaCuTeO2	123	9	0.79693	-0.0985799
1609509	RbSbSeO	9	16	0.796826	-0.0986363
1021744	CaHfAgAu	216	16	0.796768	-0.0986679
372000	YTl2Sn	225	16	0.796736	-0.0986856
1507218	CsMgBr2Cl	63	20	0.796703	-0.0987035
10839	BaCaSn	62	12	0.796583	-0.0987692
866980	TlGaGe	216	12	0.795909	-0.0991366
881644	RbLiTe	216	12	0.795878	-0.0991536
1647824	Cs4Br3Cl	6	8	0.795818	-0.0991864
418881	Ba2ZnHg	225	16	0.795493	-0.0993639
543599	Sr2CdGa	225	16	0.795334	-0.0994505
899659	PdPbAu	216	12	0.794886	-0.0996954
405230	YCdCu2	225	16	0.794752	-0.0997683
1735723	Cs2SeO3	63	24	0.794622	-0.0998397
898504	LiPdPb	216	12	0.794574	-0.0998654
1364781	Cs2ZnF4	139	14	0.794463	-0.0999262
899632	GePdPb	216	12	0.79446	-0.0999279
1348454	K2CdS2	72	20	0.794132	-0.100107
946137	RbSnAu	216	12	0.794	-0.100179
1382378	CsMgF3	194	10	0.793334	-0.100544
1554909	Rb4SeS	123	6	0.793302	-0.100562
1012378	YBeTlPd	216	16	0.793178	-0.100629
1384711	Cs2NiCl4	123	7	0.792841	-0.100814
443662	KCa2Sn	225	16	0.792718	-0.100881
1032872	NaBeBiPt	216	16	0.792666	-0.10091
1280796	SrCdSe2	62	16	0.792439	-0.101034
995834	LiCaNiSb	216	16	0.792035	-0.101256
516197	CaYAu2	225	16	0.791979	-0.101286
1514359	KRb2Ag3As2	166	24	0.791416	-0.101595
765920	LiCoHgBi	216	16	0.79037	-0.102169
1562101	Rb2BiSbPb2	156	6	0.79036	-0.102175
1012736	Na2PbSe2	164	5	0.790052	-0.102344
1209353	Cs2NaMgF6	225	40	0.790018	-0.102363
1209360	Cs2NaMgF6	225	40	0.790018	-0.102363
567882	KSbPt	216	12	0.789817	-0.102473
1495842	Na3Sr3BiAs2	189	9	0.789357	-0.102726
915156	SrZnIn	216	12	0.788591	-0.103148
1357749	CsHfAgSe3	62	24	0.788536	-0.103179
492443	RbBaSn2	225	16	0.788426	-0.103239
360784	CaSc2Pt	225	16	0.787844	-0.10356
545130	Sr2AgTe	225	16	0.787697	-0.103641
543897	Sr2CaHg	225	16	0.787684	-0.103648
1554760	KNa3Se2	115	6	0.787527	-0.103735
1518136	BaCaPb	62	12	0.787331	-0.103842
941568	CsAlPb	216	12	0.787218	-0.103905
581319	CdSiAg	216	12	0.78668	-0.104202
11558	Rb2CdO2	60	20	0.786453	-0.104327
544258	Sr2SnIr	225	16	0.786059	-0.104545
1514358	Cs2KAg3As2	166	24	0.786005	-0.104575
371678	LiCaTl2	225	16	0.78583	-0.104671
912890	BaZnGa	216	12	0.785513	-0.104847
328844	CsI	166	6	0.785424	-0.104896
867410	GeSbPb	216	12	0.785076	-0.105089
1283062	Ba2RuSe3F2	62	32	0.784831	-0.105224
952391	BaGaSn	216	12	0.784743	-0.105273
994913	LiCaNiAs	216	16	0.784741	-0.105273
25038	CsAuO	139	24	0.784304	-0.105515
1385356	Na2PdCl4	123	7	0.784284	-0.105527
1353969	RbYCdSe3	12	24	0.784149	-0.105601
568213	SrPdPt	216	12	0.783946	-0.105714
1647850	Rb2ICl	26	8	0.783604	-0.105903
1619025	CsMg2Cd2As3	115	8	0.783389	-0.106023
936438	BaAgGe	216	12	0.783236	-0.106107
696451	LiCuAgBi	216	16	0.783164	-0.106147
1514167	K2RbGaSb2	72	24	0.783089	-0.106189
1609283	KRbAgAs	11	8	0.782987	-0.106245
1116205	YCd2Ni	216	16	0.78281	-0.106344
581791	KAsPb	216	12	0.78272	-0.106394
1018175	Ca2BiAu	62	16	0.78204	-0.106771
947068	GeTeAu	216	12	0.781729	-0.106944
1708651	Cs2LiYF6	225	40	0.781442	-0.107103
1466017	K3Na3Sb2	166	24	0.781212	-0.107231
544613	Sr2TlCu	225	16	0.781138	-0.107272
567333	CsSrPt	216	12	0.781041	-0.107326
953388	TlGaTe	216	12	0.780465	-0.107646
1257555	CsScZnSe3	63	24	0.780451	-0.107654
567112	KSrPt	216	12	0.779327	-0.10828
1750679	Na3TlCl6	163	20	0.779126	-0.108392
899490	CsAgPd	216	12	0.77887	-0.108535
1006359	SrMgZrPd	216	16	0.778772	-0.10859
1759365	CsBeH3	14	20	0.778738	-0.108608
544189	Sr2AgPd	225	16	0.778713	-0.108623
62011	Li2ZnI4	62	28	0.778071	-0.108981
1001816	ScTiCuPd	216	16	0.777778	-0.109144
1357733	RbZrCuSe3	62	24	0.777737	-0.109167
762649	YCoCuPb	216	16	0.777665	-0.109208
1442304	Ba4SeCl6	44	22	0.777657	-0.109212
1727011	K3RuF6	139	20	0.777481	-0.10931
788266	ScCuHgGe	216	16	0.777259	-0.109434
946863	KLiAu	216	12	0.777152	-0.109494
1493227	CsZrAgSe2S	11	12	0.776422	-0.109902
1554893	K3LiS2	115	6	0.775496	-0.11042
417373	Ba2ZnGe	225	16	0.775325	-0.110516
1452809	NaAg2RuF6	148	30	0.775225	-0.110572
689141	K2NaAs	194	8	0.775062	-0.110664
1753222	K2GeTe2	72	20	0.77481	-0.110805
307531	RbBi	221	2	0.774765	-0.11083
1611877	SrAg2Ge(SeS)2	5	16	0.77438	-0.111046
986088	BaCdSb	216	12	0.774175	-0.111161
544652	Sr2CdAs	225	16	0.774047	-0.111233
1609282	KRbAgAs	40	16	0.773772	-0.111387
1256883	KScZnSe3	63	24	0.773663	-0.111448
409298	Y2BeAu	225	16	0.773114	-0.111756
582199	HgGeAs	216	12	0.772892	-0.111881
313936	Ba3I	225	16	0.772634	-0.112026
1358523	RbYCdSe3	62	24	0.772625	-0.112031
1369683	K4ZnSb2	166	21	0.772607	-0.112041
1254233	RbZrAgSe3	63	24	0.771862	-0.11246
514407	CaMgHg2	225	16	0.771724	-0.112538
995615	LiMgBiPt	216	16	0.771707	-0.112547
515919	TiCuAu2	225	16	0.77166	-0.112574
1431084	Cs2CuPbF6	225	40	0.771631	-0.11259
935913	RbAgSn	216	12	0.771541	-0.112641
345728	KSr3	221	4	0.771361	-0.112743
946923	SbTeAu	216	12	0.771229	-0.112816
1267482	BaZnCdSe3	63	24	0.771219	-0.112823
581939	CdGaAs	216	12	0.771217	-0.112823
543692	KSr2Bi	225	16	0.771137	-0.112868
554647	BaSrCd2	225	16	0.770702	-0.113114
1431104	Cs2AgHgF6	225	40	0.770425	-0.11327
23212	CsLi3Cl4	63	32	0.7702	-0.113396
1514361	K2RbAg3Bi2	166	24	0.77014	-0.11343
543763	NaSr2Ga	225	16	0.769739	-0.113656
545046	Sr2CdCu	225	16	0.769703	-0.113677
25733	Sr2GeSe4	40	28	0.769333	-0.113885
1374055	CsHfAgSe3	11	12	0.769309	-0.113899
309589	Ca3Au	225	16	0.769231	-0.113943
1255559	BaScAuSe3	63	24	0.769063	-0.114038
899060	CdAsPd	216	12	0.768682	-0.114253
1357605	CsTiAgTe3	62	24	0.768579	-0.114311
1587731	Sr2SnSe3S	40	28	0.768311	-0.114463
936600	InAgSb	216	12	0.768241	-0.114503
1440231	NaCl	129	4	0.76824	-0.114503
2342	RbMgCl3	194	20	0.767743	-0.114784
914794	ZnGaTe	216	12	0.767713	-0.114801
1014537	Sr2SbAu	71	24	0.767371	-0.114995
545167	Sr2CdTe	225	16	0.767369	-0.114996
1482954	CsSr3Pd	47	5	0.76722	-0.11508
1110328	Sr2InCu	216	16	0.767007	-0.115201
881065	LiSnPb	216	12	0.766062	-0.115736
443079	CsCa2Pb	225	16	0.765966	-0.11579
1283072	Ba2ZrSe3F2	62	32	0.765825	-0.11587
483645	SrZn2Cd	225	16	0.765721	-0.115929
867017	GaAgGe	216	12	0.765437	-0.11609
947066	LiPbAu	216	12	0.765271	-0.116185
309502	Sr3Pd	225	16	0.764677	-0.116522
946364	BaScAu	216	12	0.764534	-0.116603
410839	Y2NiPt	225	16	0.764362	-0.116701
417486	Ba2CuGe	225	16	0.764328	-0.116721
581794	InAsPb	216	12	0.76416	-0.116815
914174	BaSrZn	216	12	0.76414	-0.116827
1753699	KBaCO3F	187	7	0.764071	-0.116867
1570935	Cs3BrCl2	164	6	0.763393	-0.117252
899840	HgPdAu	216	12	0.763104	-0.117416
326938	RbAg	166	6	0.762788	-0.117596
11104	CsNiCl3	194	10	0.762471	-0.117777
418747	Ba2SrCd	225	16	0.762425	-0.117803
1363217	CsNiCl3	194	10	0.762046	-0.118019
410328	Y2ZnPd	225	16	0.761726	-0.118201
516007	HfAlAu2	225	16	0.761625	-0.118259
1257558	CsYZnSe3	63	24	0.761579	-0.118285
1732534	K5AgAs2	194	16	0.761232	-0.118483
1394497	K2LiInF6	225	40	0.761223	-0.118488
418628	Ba2NaBi	225	16	0.761212	-0.118495
1110963	YCd2Cu	216	16	0.761123	-0.118545
306729	CsCa	221	2	0.760929	-0.118656
417687	Ba2CdSi	225	16	0.760605	-0.118841
1551559	KRbTe2Pt	44	10	0.760499	-0.118902
1647881	KRbCl2	31	8	0.759147	-0.119674
1015954	BaCa2Pb	216	16	0.758916	-0.119807
1817	CsAg3S2	12	24	0.758237	-0.120195
1720802	Cs2MgNiCl6	139	20	0.758072	-0.12029
1552725	K2CaCdSb2	115	6	0.757938	-0.120366
947625	CdAsAu	216	12	0.757311	-0.120726
1740272	K2SrZnSb2	26	12	0.756658	-0.1211
306157	CsMg	221	2	0.756197	-0.121365
1481990	KSrBi	62	12	0.756182	-0.121374
409512	Y2InAu	225	16	0.755978	-0.121491
1667677	Cs2CuPbF6	225	40	0.755753	-0.12162
880386	BaLiTe	216	12	0.755746	-0.121624
348845	PPb3	221	4	0.755548	-0.121738
1445180	CaSbPt	62	12	0.755506	-0.121762
543125	Sr2HgBi	225	16	0.755222	-0.121925
454219	SrIn2Ag	225	16	0.755072	-0.122012
1617864	K4Na2AsP	187	8	0.755005	-0.12205
481971	SrZn2Sb	225	16	0.754747	-0.122199
917388	KNaSb	216	12	0.754542	-0.122316
454478	KIn2Sb	225	16	0.754503	-0.122339
469019	K2ZnSb	225	16	0.753794	-0.122747
416893	Ba2ZnPb	225	16	0.753763	-0.122765
828348	NaCdAs	216	12	0.753759	-0.122768
1721073	CsMgF3	12	20	0.753683	-0.122811
1022866	YBeCdAu	216	16	0.753583	-0.122869
952076	NaInGa	216	12	0.752779	-0.123332
309008	Ba3Pd	225	16	0.752663	-0.1234
1647852	Rb2ICl	11	8	0.752526	-0.123478
1482667	RbSrSb	62	12	0.752447	-0.123524
1667678	Cs2CuPbF6	225	40	0.752203	-0.123665
545043	Sr2LiTe	225	16	0.752172	-0.123683
946727	LiCdAu	216	12	0.751974	-0.123797
483942	BaYZn2	225	16	0.751968	-0.123801
1209343	Cs2KNF6	225	40	0.751829	-0.123881
1209365	Cs2KNF6	225	40	0.751829	-0.123881
2096	Tl3BO3	176	14	0.751617	-0.124003
1444085	Rb3LiCl4	38	16	0.751559	-0.124037
899824	CdPdAu	216	12	0.751303	-0.124185
1443302	NaI	11	4	0.751129	-0.124285
1555117	Ba2Se3S	1	6	0.750845	-0.12445
314166	Sr3Sc	225	16	0.750813	-0.124468
1354810	KYCdSe3	12	24	0.750767	-0.124495
1358397	KYCdSe3	62	24	0.75067	-0.124551
311201	Ba3Zn	225	16	0.750544	-0.124624
1444687	KNaS	62	12	0.750466	-0.124669
1476187	K4SrAs2	166	21	0.75037	-0.124725
1372935	Rb2MgSn	63	16	0.750216	-0.124814
1571351	CsRb2I3	164	6	0.750192	-0.124828
897871	InPdPb	216	12	0.749727	-0.125097
1347038	Cs2Cd3O4	72	36	0.749706	-0.125109
820564	YTlNiRh	216	16	0.749553	-0.125198
1490775	RbYZnTe2Se	63	24	0.749475	-0.125243
544479	Sr2TlBi	225	16	0.749437	-0.125265
1586982	BaSrAsAu	62	16	0.749374	-0.125301
1748906	K2BaSnSb2	26	12	0.748672	-0.125708
520373	SrMgGa2	225	16	0.748595	-0.125753
1610465	KNaLiAs	186	8	0.748176	-0.125996
1514357	K2RbAg3As2	166	24	0.747812	-0.126208
1346156	CsFeF3	63	20	0.747656	-0.126298
1381084	RbScCdSe3	11	12	0.74738	-0.126459
506916	SrScAg2	225	16	0.747276	-0.126519
1431849	ScTl2NiBr6	225	40	0.747075	-0.126636
1278111	KZnCl3	148	30	0.747026	-0.126664
11579	Cs2PbO3	63	24	0.746833	-0.126777
681695	SrRuO3	62	20	0.74608	-0.127214
899081	AgPdPb	216	12	0.745563	-0.127516
1380960	KYCdSe3	11	12	0.745211	-0.12772
544986	Sr2HgSb	225	16	0.744951	-0.127873
1586966	SrCaSnHg	62	16	0.744921	-0.12789
1517000	K2LiTcF6	87	20	0.744446	-0.128167
442520	Ca2MgPd	225	16	0.744441	-0.12817
1430178	K2LiInF6	225	40	0.743725	-0.128588
363468	BaScPt2	225	16	0.743708	-0.128597
929849	BaSbPb	216	12	0.743488	-0.128726
937752	YTlAg	216	12	0.743456	-0.128745
443887	Ca2AsPd	225	16	0.7429	-0.12907
953185	GaTePb	216	12	0.74287	-0.129087
1357739	RbZrAgSe3	62	24	0.742755	-0.129154
1366717	Rb2MgSe2	72	20	0.742592	-0.12925
468669	HfScPd2	225	16	0.742393	-0.129366
583266	HgTeAs	216	12	0.742195	-0.129482
1482271	NaCa3Pt	11	10	0.742091	-0.129543
1003711	CaMgZrPd	216	16	0.741351	-0.129976
880251	CsLiTe	216	12	0.741187	-0.130072
914644	SrLiZn	216	12	0.741119	-0.130112
794977	YCuAgSn	216	16	0.741065	-0.130144
953082	SrCdGa	216	12	0.740644	-0.13039
819787	BeNiSbPd	216	16	0.740453	-0.130503
1033160	NaMgBiPd	216	16	0.740402	-0.130532
1587714	BaSrSn(SeS)2	40	28	0.739891	-0.130832
581460	SrAsPb	216	12	0.739708	-0.13094
463856	YMgPd2	225	16	0.739638	-0.130981
583340	CdSnAs	216	12	0.739511	-0.131055
514805	SrCaHg2	225	16	0.738468	-0.131669
1385921	CsFeF3	194	10	0.738209	-0.131821
893850	CdGeIr	216	12	0.738152	-0.131854
887709	TlInPb	216	12	0.738067	-0.131904
1752748	LiYCl4	88	24	0.737923	-0.131989
938016	SrScAg	216	12	0.737782	-0.132072
417445	KBa2Bi	225	16	0.737528	-0.132221
1257269	RbYHgS3	63	24	0.736865	-0.132612
417620	CsBa2Bi	225	16	0.736492	-0.132832
899550	LiTlPd	216	12	0.736252	-0.132974
1493104	KZrAgTe2S	11	12	0.736104	-0.133061
545044	Sr2TlSb	225	16	0.736048	-0.133094
948368	YGaAu	216	12	0.735949	-0.133152
1742889	K2CaCdSb2	26	12	0.73583	-0.133223
1554910	Rb4TeS	123	6	0.735631	-0.13334
867490	LiCdGe	216	12	0.735267	-0.133555
1257318	RbYCdSe3	63	24	0.73512	-0.133642
544549	Sr2CdGe	225	16	0.734897	-0.133773
1538590	Ba3AlPb	74	20	0.734466	-0.134029
867867	RbGePb	216	12	0.734378	-0.134081
469190	K2SrSb	225	16	0.734051	-0.134274
898872	TlAsPd	216	12	0.733983	-0.134314
308683	Ba3Sc	225	16	0.733285	-0.134727
543871	CsSr2Bi	225	16	0.733254	-0.134745
867204	RbInGe	216	12	0.733227	-0.134762
1032005	LiCdGaNi	216	16	0.733176	-0.134792
25393	BaAg2GeSe4	23	16	0.732934	-0.134935
544877	NaSr2Bi	225	16	0.732911	-0.134949
27143	Ba2CdAs2	36	20	0.732769	-0.135033
514467	NaLiHg2	225	16	0.730958	-0.136108
1708388	K2LiInF6	225	40	0.73077	-0.136219
1358521	RbScCdSe3	62	24	0.730417	-0.136429
1533376	CsSr3Cu	63	20	0.730203	-0.136556
844264	TlTePb	216	12	0.72965	-0.136885
938345	ScAgHg	216	12	0.729563	-0.136937
13909	K2NaInSb2	64	48	0.729464	-0.136996
923543	RbBaSn	216	12	0.729438	-0.137012
869039	TlGeTe	216	12	0.729411	-0.137028
443062	LiCa2Au	225	16	0.729341	-0.137069
1429196	Rb2HfScSe6	225	40	0.729206	-0.13715
1554911	Rb4SeO	123	6	0.729194	-0.137157
444125	Ca2NiPt	225	16	0.729096	-0.137215
1731729	K2Ag2SnS4	13	18	0.728926	-0.137317
1517097	K2LiInF6	148	30	0.728351	-0.137659
1365991	RbBiPb	186	6	0.727046	-0.138438
433676	Rb2PdO4	227	56	0.726738	-0.138622
1721071	CsFeF3	12	20	0.726519	-0.138753
583008	AgAsPb	216	12	0.726492	-0.138769
5159	K3Bi	194	8	0.726131	-0.138985
1354808	KScCdSe3	12	24	0.726125	-0.138988
307365	KZn	221	2	0.7258	-0.139183
1038394	BaSbAu	216	12	0.725566	-0.139323
418612	Ba2NiPd	225	16	0.725531	-0.139344
1411958	K2NaGaF6	225	40	0.725438	-0.1394
1430851	Cs2NaMgF6	225	40	0.725272	-0.139499
1553348	Rb2Na2SeS	99	6	0.725191	-0.139548
1370992	K2SrO4	65	14	0.725108	-0.139597
1541487	K2LiInF6	225	40	0.724682	-0.139853
1541488	K2LiInF6	225	40	0.724682	-0.139853
545526	Sr2LiBi	225	16	0.724538	-0.139939
1017940	Sr2AsAu	62	16	0.723808	-0.140377
888295	KSrIn	216	12	0.723429	-0.140604
1368173	Cs2PtSe2	71	10	0.723328	-0.140665
1570941	Cs3ICl2	164	6	0.723208	-0.140737
1117085	Ba2CaSc	216	16	0.723169	-0.14076
936643	InAgTe	216	12	0.722963	-0.140884
1388211	Sr2SnSe4	40	28	0.722947	-0.140894
868137	RbGaGe	216	12	0.722775	-0.140997
1571349	Cs2RbI3	164	6	0.722093	-0.141407
25491	BaPdCl4	60	24	0.721906	-0.141519
307370	RbSe	221	2	0.721439	-0.1418
1364969	Cs2HfTe3	63	24	0.721409	-0.141818
1613269	K6BiSb	187	8	0.72093	-0.142107
583270	BaTlAs	216	12	0.720849	-0.142156
1706041	K2LiGaF6	225	40	0.72082	-0.142173
936191	RbSrAg	216	12	0.720436	-0.142405
1035266	NaMgSbPd	216	16	0.719961	-0.142691
418318	Ba2NiHg	225	16	0.719918	-0.142717
1570931	Cs3Br2Cl	164	6	0.719832	-0.142769
1667460	Cs2CuBiF6	148	30	0.719441	-0.143005
418504	Ba2NiPt	225	16	0.719441	-0.143005
1346122	Cs3Zn2F7	139	24	0.719417	-0.143019
581862	TlAsPb	216	12	0.719323	-0.143076
418401	Ba2CdAs	225	16	0.719227	-0.143134
823409	Na2TlNi	216	16	0.719098	-0.143212
1547170	Cs2ZnAgF6	225	40	0.718935	-0.14331
796574	YAlCuAu	216	16	0.718837	-0.14337
892513	SrTlIr	216	12	0.718725	-0.143437
1554855	K3RbO2	115	6	0.718521	-0.143561
544608	Sr2LiZn	225	16	0.717778	-0.14401
867443	CsGePb	216	12	0.717759	-0.144021
1481950	KBaAs	62	12	0.717754	-0.144024
937006	ZnGaAg	216	12	0.717742	-0.144032
1570644	Rb3I2Br	164	6	0.717306	-0.144296
442669	KCa2Pt	225	16	0.717118	-0.144409
943742	SrHgSb	216	12	0.717086	-0.144428
543390	Sr2AgPt	225	16	0.716514	-0.144775
795779	YCuSnIr	216	16	0.716398	-0.144846
986213	SrLiCd	216	12	0.716145	-0.144999
1403316	KSrAsS4	11	14	0.715916	-0.145138
464142	YScPd2	225	16	0.715866	-0.145169
1609476	Cs2TiBSe4	5	16	0.71555	-0.14536
937035	KAgSn	216	12	0.715454	-0.145418
941422	AlGaPb	216	12	0.715409	-0.145446
582472	RbAsPb	216	12	0.715243	-0.145546
555632	SrCd2In	225	16	0.714785	-0.145825
1364560	NaAgTe	194	6	0.71461	-0.145931
1482689	BaCd3Rh	38	10	0.714202	-0.146179
1570930	Cs3IBr2	164	6	0.713565	-0.146566
1741907	K4AgAs2	166	21	0.713312	-0.14672
1373247	Ba2HgSb2	36	20	0.713247	-0.14676
544727	Sr2SiAg	225	16	0.713184	-0.146798
1233431	SrI2	136	6	0.7131	-0.14685
687340	KRbLiAlF6	166	60	0.712214	-0.14739
1345337	K6ZnO4	186	22	0.712142	-0.147434
1476079	CsCoBr3	194	10	0.71186	-0.147606
12171	Ba2CdSe3	62	24	0.711849	-0.147612
914403	ZnCdAs	216	12	0.711798	-0.147643
1441356	CsNa2Cl3	71	12	0.711433	-0.147866
946095	BaInAu	216	12	0.711259	-0.147972
545188	Sr2AlAg	225	16	0.711233	-0.147988
498857	NaPtPb2	225	16	0.71086	-0.148216
915184	YZnHg	216	12	0.709536	-0.149026
1481915	CsZnTeH	156	4	0.709141	-0.149267
5160	K3Sb	194	8	0.709029	-0.149336
305434	CsBi	221	2	0.708366	-0.149742
1617862	K4Na2SbP	187	8	0.70829	-0.149789
4249	Rb3InS3	12	28	0.708025	-0.149951
901392	KBaSr	216	12	0.707753	-0.150118
953010	GaHgTe	216	12	0.70757	-0.150231
1385626	Ba2GeSe4	40	28	0.707241	-0.150432
580764	SiHgSb	216	12	0.707185	-0.150467
1003390	NaMgBiPt	216	16	0.707031	-0.150561
1493542	CsScZnTe2Se	63	24	0.706958	-0.150606
1473223	Rb2Se	166	9	0.706731	-0.150746
1545095	BaTe2Pb	123	4	0.706481	-0.150899
1385701	KCaCl3	99	5	0.706397	-0.150951
553546	SrCd2Sb	225	16	0.706298	-0.151012
417351	Ba2CdGa	225	16	0.706236	-0.15105
1254008	KZrAgSe3	63	24	0.706058	-0.15116
1015959	BaCa2Hg	216	16	0.705892	-0.151262
947078	KSrAu	216	12	0.705867	-0.151277
944738	BaSnHg	216	12	0.705815	-0.151309
1670383	Rb2ZrAg2(SeS)2	3	9	0.705559	-0.151467
1570549	K2NaCl3	164	6	0.705111	-0.151742
1430828	Cs2TlAgF6	225	40	0.704925	-0.151857
1432153	Rb2MgScCl6	225	40	0.70475	-0.151965
1541501	K2LiScF6	225	40	0.704559	-0.152083
1541502	K2LiScF6	225	40	0.704559	-0.152083
1023081	CaHfCuAu	216	16	0.704355	-0.152208
1482921	CsSiAu3	2	10	0.70434	-0.152217
917799	TlInSb	216	12	0.704213	-0.152296
6686	RbMnCl3	194	30	0.703788	-0.152558
898623	KBaPd	216	12	0.70376	-0.152575
1482663	RbBaSb	62	12	0.703619	-0.152662
924896	SnHgTe	216	12	0.703337	-0.152836
545578	Sr2CuPd	225	16	0.702897	-0.153109
1344493	K6Cl4O	167	66	0.702801	-0.153167
1479483	KI	14	16	0.70257	-0.15331
1357219	YPbAuSe3	62	24	0.702542	-0.153328
442536	RbCa2Sn	225	16	0.702541	-0.153329
1735748	Cs4KLiRu2F12	166	60	0.701847	-0.153757
544646	Sr2ZnAg	225	16	0.701797	-0.153788
559666	Rb2LiSb	225	16	0.701603	-0.153909
868736	SrCdGe	216	12	0.701026	-0.154266
2331	Cs2PbO3	36	24	0.700883	-0.154355
543824	Sr2IrPb	225	16	0.700499	-0.154593
828488	RbCdAs	216	12	0.700162	-0.154801
1432266	Rb2ScMnCl6	225	40	0.699638	-0.155126
516859	ZnCuAu2	225	16	0.699381	-0.155286
818911	LiNiAgBi	216	16	0.699095	-0.155464
948110	ZnHgAu	216	12	0.698493	-0.155838
578936	SrSiHg	216	12	0.69841	-0.15589
346341	CsSr3	221	4	0.698042	-0.156119
1016112	BaCaPb2	216	16	0.697753	-0.156298
418856	Ba2CuHg	225	16	0.697646	-0.156365
1023176	CaZrCuAu	216	16	0.697098	-0.156706
1022863	CaYBeAu	216	16	0.696825	-0.156876
867458	CdInGe	216	12	0.69664	-0.156992
470205	K2LiSb	225	16	0.696474	-0.157095
1613133	K4MgZnSn2	12	16	0.696439	-0.157117
951761	KTlGa	216	12	0.696378	-0.157155
763554	LiCdCuSi	216	16	0.695798	-0.157517
5890	K2CuCl3	62	24	0.695562	-0.157664
418394	Ba2ZnAg	225	16	0.695539	-0.157679
948412	InAsAu	216	12	0.695443	-0.157738
948606	YAsAu	216	12	0.695213	-0.157882
916664	CsBaSb	216	12	0.695145	-0.157925
417757	Ba2IrAu	225	16	0.695073	-0.15797
1614947	KRbMgCl4	107	14	0.694841	-0.158115
1359231	BaScAuSe3	62	24	0.694716	-0.158193
417305	Ba2NiAu	225	16	0.694439	-0.158366
1750763	CsBF4	189	18	0.69438	-0.158403
516724	ScBeAu2	225	16	0.693987	-0.158649
515619	YBiAu2	225	16	0.69391	-0.158697
1431052	Cs2LiMgF6	225	40	0.693577	-0.158906
1481985	KBaSb	62	12	0.693567	-0.158912
1611841	BaSiAg2(TeSe)2	5	16	0.693327	-0.159062
23223	CsLi2I3	115	6	0.693177	-0.159156
545503	Sr2CdRh	225	16	0.693023	-0.159252
1002160	MgAgBiPd	216	16	0.692562	-0.159542
868560	NaTlGe	216	12	0.692514	-0.159572
1370645	Cs2MgSe2	72	20	0.692318	-0.159694
942812	RbAlTl	216	12	0.692106	-0.159827
580331	CdSiGe	216	12	0.691981	-0.159906
581545	SrTlAs	216	12	0.691252	-0.160364
543892	Sr2InTe	225	16	0.690409	-0.160893
1549412	NaMg(TlCl3)2	225	40	0.690308	-0.160957
13113	KTe	194	8	0.690188	-0.161032
1012429	YBeTlPt	216	16	0.690144	-0.16106
867164	TlAgGe	216	12	0.689988	-0.161159
567367	GaHgPt	216	12	0.689608	-0.161398
1753689	K3NaBe2F8	164	14	0.689598	-0.161404
545630	Sr2MgCd	225	16	0.689349	-0.161561
1345630	K2CdO2	72	20	0.688992	-0.161786
1348346	Rb2Ag4Se3	12	36	0.688231	-0.162266
912873	SrZnPb	216	12	0.688195	-0.162288
952417	NaGaSb	216	12	0.688136	-0.162326
1432571	Cs2MgAgCl6	225	40	0.68805	-0.16238
1483320	Cs2Zn3Te4	72	36	0.687786	-0.162547
416915	Ba2ZnTe	225	16	0.687664	-0.162624
1358509	RbYHgSe3	62	24	0.68721	-0.162911
937510	BaAgSb	216	12	0.686806	-0.163166
6220	K3NaFeCl6	167	66	0.686682	-0.163244
372407	BaAlTl2	225	16	0.68651	-0.163353
411678	Y2CuPt	225	16	0.686345	-0.163457
467765	ZrScPd2	225	16	0.686345	-0.163458
787988	LiTlCuHg	216	16	0.686173	-0.163566
544464	Sr2TlAs	225	16	0.68587	-0.163758
1610618	K4Na2BiAs	187	8	0.685764	-0.163825
579458	KTlSi	216	12	0.685492	-0.163998
1377082	Cs2MgTe2	72	20	0.685307	-0.164115
1493169	RbZrAgTe2S	11	12	0.6851	-0.164246
1427605	BaScAuSe3	11	12	0.684394	-0.164694
1482315	NaTlSe2	187	4	0.684089	-0.164888
1022888	CaBeGaAu	216	16	0.683881	-0.16502
1396766	RbNaSeO4	173	14	0.683763	-0.165094
418039	KBa2Sn	225	16	0.683524	-0.165246
1283046	Ba2GeSe3F2	62	32	0.683228	-0.165434
1613083	KRbMgSn	38	16	0.682511	-0.16589
513751	BaSrHg2	225	16	0.682437	-0.165938
446622	KLi2Hg	225	16	0.68224	-0.166063
986649	BaLiCd	216	12	0.682072	-0.16617
567584	LiHgPt	216	12	0.681713	-0.166398
566325	SrSbPt	216	12	0.681511	-0.166527
948246	SrScAu	216	12	0.681259	-0.166687
1431002	Cs2CuBiF6	225	40	0.680745	-0.167016
372881	SrTl2Zn	225	16	0.680532	-0.167151
14071	Rb3Sb	194	8	0.680512	-0.167164
819842	MgNiBiPd	216	16	0.68028	-0.167312
1748915	Rb2SrCdSb2	26	12	0.680193	-0.167368
1387497	CsMnBr3	166	45	0.680178	-0.167378
845007	NaZnTe	216	12	0.679941	-0.167529
1023083	CaYHgAu	216	16	0.679573	-0.167764
1541727	K2LiScCl6	14	20	0.679478	-0.167825
493229	CsBaSn2	225	16	0.679289	-0.167945
581969	RbNaAs	216	12	0.679201	-0.168002
27090	K2SrCdSb2	26	12	0.67882	-0.168245
899291	KSbPd	216	12	0.678611	-0.168379
914868	RbZnTe	216	12	0.678143	-0.168679
544288	KSr2Sn	225	16	0.678106	-0.168703
1482263	NaHgAs	70	48	0.678043	-0.168743
567991	HgSbPt	216	12	0.67786	-0.16886
432066	Rb2BiO4	227	56	0.67772	-0.16895
443198	BaCa2Au	225	16	0.677617	-0.169015
1475770	Rb2SiTe2	72	20	0.677551	-0.169058
1295816	AgPbSeF	166	24	0.677159	-0.169309
467881	AlSiPd2	225	16	0.676992	-0.169416
948471	SrSiAu	216	12	0.676954	-0.169441
555518	BaCaCd2	225	16	0.676942	-0.169448
515076	RbYAu2	225	16	0.67652	-0.169719
786679	NbAlCuPt	216	16	0.676405	-0.169793
1365057	Cs2KInP2	72	24	0.676324	-0.169845
1481988	KSr3Pd	47	5	0.675719	-0.170234
1431015	Cs2TlAgF6	225	40	0.675541	-0.170348
545033	Sr2LiIn	225	16	0.675205	-0.170564
897975	RbBaPd	216	12	0.675127	-0.170614
880522	NaLiIn	216	12	0.674969	-0.170716
1553673	K2Cd2SbAs	99	6	0.674839	-0.1708
1382655	CsBaF3	161	30	0.674576	-0.170969
1452235	Cs2SnPdF6	87	20	0.674498	-0.17102
1035613	NaZnNiSb	216	16	0.673692	-0.171539
897939	BaCdPd	216	12	0.673527	-0.171645
1256979	KScCdSe3	63	24	0.67329	-0.171798
543279	Sr2AsAu	225	16	0.673217	-0.171845
545602	Sr2TePt	225	16	0.6728	-0.172114
867268	BaCdGe	216	12	0.672769	-0.172134
935871	BaInAg	216	12	0.672715	-0.172169
951345	CsGaSn	216	12	0.672405	-0.172369
1439720	SrI2	58	6	0.672338	-0.172413
346535	KBi3	221	4	0.672192	-0.172506
582039	CsAsPb	216	12	0.672036	-0.172607
1364304	RbFeF4	63	24	0.671713	-0.172816
463055	MgPd2Pb	225	16	0.671376	-0.173034
446588	Li2CdAs	225	16	0.671101	-0.173212
923097	SrSnPb	216	12	0.671023	-0.173262
543489	Sr2AlPd	225	16	0.670746	-0.173442
417341	Ba2CaTe	225	16	0.670685	-0.173481
328777	CsBr	166	6	0.670487	-0.17361
914964	ZnGePb	216	12	0.669659	-0.174146
543272	Sr2GaAg	225	16	0.669274	-0.174396
899999	AsPdPb	216	12	0.669232	-0.174424
953295	SrGaPd	216	12	0.669136	-0.174485
820656	CdNiBiRh	216	16	0.669128	-0.17449
347874	Na3Bi	221	4	0.66912	-0.174496
868664	HgGeTe	216	12	0.669098	-0.17451
543998	NaSr2In	225	16	0.66904	-0.174548
545407	Sr2TePd	225	16	0.668959	-0.1746
1346148	Rb2ZnSe2	72	20	0.668666	-0.174791
1430058	K2NaGaF6	225	40	0.668311	-0.175022
566756	LiCdPt	216	12	0.668244	-0.175065
1576137	Cs2ZnHgF6	225	40	0.668077	-0.175173
1609136	RbNaAgBi	11	8	0.668037	-0.175199
309115	Ba3Cd	225	16	0.667512	-0.175541
881627	LiTePb	216	12	0.667132	-0.175788
914293	ZnSnPb	216	12	0.666984	-0.175885
897868	KPdPb	216	12	0.666228	-0.176377
1473398	BaI2	72	12	0.665859	-0.176618
1381204	CsScCdTe3	11	12	0.665763	-0.17668
942950	KNaAl	216	12	0.665341	-0.176956
1229911	KI	187	2	0.665291	-0.176988
545142	Sr2InAg	225	16	0.664755	-0.177339
1609009	K4CuAs2Au	12	16	0.664612	-0.177432
868668	BaTlGe	216	12	0.664168	-0.177722
1373681	K3ScCl6	148	30	0.663519	-0.178147
417850	Ba2GeTe	225	16	0.663502	-0.178158
1554751	K3RbSe2	115	6	0.663369	-0.178245
1257315	RbScCdSe3	63	24	0.663003	-0.178484
347180	Tl3Cu	221	4	0.662755	-0.178647
1617373	K4CdAsP	160	21	0.662611	-0.178741
1476167	Ag2PbSe2	164	5	0.662475	-0.17883
444523	Ca2MgPt	225	16	0.661753	-0.179304
1586948	SrCaSbAu	62	16	0.661542	-0.179443
1570944	Cs3HCl2	164	6	0.660936	-0.179841
914918	ZnCdTe	216	12	0.660708	-0.179991
1736866	Cs2Zn3Se4	72	36	0.660527	-0.18011
844193	KTePb	216	12	0.660095	-0.180393
559282	Rb2SbTe	225	16	0.659562	-0.180744
1024765	YScCuAu	216	16	0.659465	-0.180808
3154	KCuCl3	14	20	0.658689	-0.181319
544107	Sr2CaPd	225	16	0.65796	-0.1818
1571354	K2RbI3	164	6	0.657736	-0.181949
581577	TlGaAs	216	12	0.657658	-0.182
894230	BaTlIr	216	12	0.657474	-0.182121
1016103	Sr2CaHg	216	16	0.657358	-0.182198
867484	TlSnGe	216	12	0.657266	-0.182259
867344	CdGaGe	216	12	0.657138	-0.182344
348539	K3Ca	221	4	0.656756	-0.182596
1254332	RbHfAuSe3	63	24	0.656738	-0.182608
819996	CdNiPdPb	216	16	0.656659	-0.18266
1358395	KScCdSe3	62	24	0.656606	-0.182695
942228	CsBaAl	216	12	0.656496	-0.182768
887748	BaNaIn	216	12	0.656013	-0.183087
1570932	Cs3HBr2	164	6	0.655475	-0.183444
688945	SrIn3Au	107	10	0.655341	-0.183532
1346906	Cs2Pd3Se4	70	72	0.655157	-0.183655
1570648	Rb3I2Cl	164	6	0.655118	-0.183681
1358641	CsScCdTe3	62	24	0.654543	-0.184062
952270	GaAgPd	216	12	0.654303	-0.184221
12323	RbNa2BO3	59	14	0.654183	-0.184301
828344	TlInAs	216	12	0.653871	-0.184508
442822	Ca2PtPb	225	16	0.653597	-0.18469
418396	Ba2CuPb	225	16	0.653296	-0.18489
443508	RbCa2Pb	225	16	0.653256	-0.184917
1345677	Rb3BO3	166	42	0.653223	-0.184939
544472	Sr2LiAg	225	16	0.652964	-0.185111
915179	RbZnAs	216	12	0.6523	-0.185552
947692	KTeAu	216	12	0.651653	-0.185983
1587736	BaSrSnSe4	40	28	0.651652	-0.185984
1737234	Sr2PbS4	40	28	0.651118	-0.18634
1707750	KMgBr3	62	20	0.650974	-0.186436
1442209	NaI	194	4	0.650372	-0.186838
1236710	Hg2Ge	227	24	0.650243	-0.186924
1357740	RbZrAgTe3	62	24	0.649919	-0.187141
868917	HgGePd	216	12	0.649868	-0.187175
845145	CdTePb	216	12	0.649814	-0.187211
898515	KSrPd	216	12	0.649264	-0.187579
1617863	K4Na2SbAs	187	8	0.648996	-0.187758
683868	Li3InCl6	12	20	0.64896	-0.187782
418431	Ba2CuSn	225	16	0.648133	-0.188336
545417	Sr2AgGe	225	16	0.648101	-0.188357
1431709	K2ScNiBr6	225	40	0.648078	-0.188373
1742982	RbFeCl3	63	20	0.647522	-0.188745
1385958	RbMnCl3	166	45	0.647493	-0.188765
578988	SrTlSi	216	12	0.647287	-0.188903
566459	KPtPb	216	12	0.646798	-0.189231
1475492	Cs2SiTe2	72	20	0.646704	-0.189294
444899	NaCa2Au	225	16	0.645946	-0.189804
1708438	RbFeCl3	12	20	0.645842	-0.189874
1553113	K2Na2TeS	99	6	0.645828	-0.189883
1368727	Cs2LiAlF6	164	10	0.645826	-0.189884
579122	BaSiHg	216	12	0.645104	-0.19037
936320	RbBaAg	216	12	0.64491	-0.190501
1375499	K3InSb2	72	24	0.644734	-0.190619
516122	YCdAu2	225	16	0.644679	-0.190656
866865	SrGePb	216	12	0.644274	-0.190929
24746	K4HgAs2	166	21	0.644215	-0.190969
1570938	Cs3I2Cl	164	6	0.643873	-0.1912
1522865	K2RbInSb2	72	24	0.643854	-0.191213
419096	Ba2InCu	225	16	0.64381	-0.191242
1541177	Cs2NaHgF6	128	20	0.643417	-0.191507
515438	BaNaAu2	225	16	0.643239	-0.191628
1522864	Rb3InSb2	72	24	0.642639	-0.192033
1666253	K2NaScCl6	14	20	0.642553	-0.192091
951613	TlGaPb	216	12	0.64229	-0.192269
948206	SrGeAu	216	12	0.641995	-0.192468
1514220	CsRb3(TeO3)2	150	12	0.641925	-0.192515
1364710	K2ZnSn	63	16	0.641902	-0.192531
513296	NaHg2Pd	225	16	0.641448	-0.192838
1346567	CsBS2	167	72	0.64139	-0.192877
544925	Sr2HgTe	225	16	0.640684	-0.193356
946468	BaPdAu	216	12	0.640409	-0.193543
868602	CdGeSb	216	12	0.639914	-0.193878
1547001	Rb2ScFeCl6	225	40	0.639759	-0.193984
418931	Ba2CuTe	225	16	0.639327	-0.194277
1513297	Cs2Ca(ClF)2	139	14	0.639256	-0.194325
1617693	CsKNaAs	164	8	0.639167	-0.194386
23217	CsLi2Br3	71	12	0.638998	-0.1945
1408951	Rb2Zr(AgTe2)2	21	18	0.63885	-0.194601
948527	SbAsAu	216	12	0.638645	-0.194741
1739964	Cs2Ti(AgTe2)2	21	18	0.638224	-0.195027
545040	Sr2GaTe	225	16	0.637939	-0.195221
516541	SrHfAu2	225	16	0.637932	-0.195226
521320	NaGa2Sb	225	16	0.637904	-0.195245
1609393	K4AgSb2Au	12	16	0.637812	-0.195307
1609392	K4CuSb2Au	12	16	0.637645	-0.195421
1729660	CsZnF3	127	10	0.637407	-0.195583
925271	TlSnTe	216	12	0.636232	-0.196385
418014	Ba2HgAs	225	16	0.635863	-0.196636
1227939	RbAg	187	2	0.635704	-0.196745
1376294	K2SrCdBi2	26	12	0.635631	-0.196795
1430558	Rb2LiReF6	225	40	0.635622	-0.196801
952189	KSrGa	216	12	0.635618	-0.196804
444028	SrCa2Au	225	16	0.635552	-0.196849
575086	BaSrTl	216	12	0.635081	-0.197171
914089	NaZnSb	216	12	0.635034	-0.197203
1734542	K2TiHgSe4	121	16	0.63489	-0.197301
1493799	K2SrCdBiSb	26	12	0.633826	-0.19803
1278097	As2PbSe4	62	28	0.633705	-0.198113
1432152	Rb2MgAlCl6	225	40	0.633341	-0.198362
418089	Ba2LiSb	225	16	0.63329	-0.198398
679586	KRbO3	148	30	0.633282	-0.198403
581490	SrHgAs	216	12	0.633276	-0.198407
544649	Sr2AlPt	225	16	0.633033	-0.198574
1493230	CsHfAgTe2Se	11	12	0.632695	-0.198806
27089	K2BaCdSb2	26	12	0.632689	-0.19881
936474	CsAgTe	216	12	0.63268	-0.198816
974662	RbBaSr	216	12	0.632629	-0.198851
1357606	CsZrAgSe3	62	24	0.632297	-0.199079
898512	YAgPd	216	12	0.632283	-0.199088
1349041	CsBSe2	166	72	0.632281	-0.19909
914787	LiZnIn	216	12	0.632015	-0.199272
828382	CsKAs	216	12	0.631747	-0.199457
543216	Sr2MgTe	225	16	0.631541	-0.199599
463369	ScGaPd2	225	16	0.631462	-0.199653
948061	KNaAu	216	12	0.630944	-0.200009
868901	NaHgGe	216	12	0.63065	-0.200211
443157	Ca2GeAu	225	16	0.630609	-0.20024
913216	RbZnIn	216	12	0.630469	-0.200336
898771	GaHgPd	216	12	0.630116	-0.200579
470526	K2CdAs	225	16	0.630049	-0.200625
938187	YAgHg	216	12	0.629974	-0.200677
899492	KInPd	216	12	0.629961	-0.200687
582419	KCdAs	216	12	0.629858	-0.200757
1285954	CsScCl3	194	10	0.629698	-0.200868
1022890	CaBeInAu	216	16	0.629325	-0.201125
543749	Sr2LiCd	225	16	0.628967	-0.201372
867299	GaGePb	216	12	0.628427	-0.201745
560197	Rb2CdSb	225	16	0.628209	-0.201896
881609	KNaLi	216	12	0.628142	-0.201942
4565	Cs3Sc2Cl9	167	84	0.627882	-0.202122
1430894	Cs2SrAgF6	225	40	0.627693	-0.202252
568080	KInPt	216	12	0.627413	-0.202447
514591	SrScHg2	225	16	0.62662	-0.202996
1383453	K2ZrSe3	63	24	0.626482	-0.203092
544950	Sr2ZnPt	225	16	0.626439	-0.203121
419333	Ba2CuPd	225	16	0.626345	-0.203186
1481265	BaCa3Pt	107	10	0.6262	-0.203287
867418	KTlGe	216	12	0.624826	-0.204241
1257654	CsYCdSe3	63	24	0.624716	-0.204317
1554903	K3NaS2	115	6	0.62429	-0.204614
917232	HgSbTe	216	12	0.623886	-0.204895
899516	TePdPb	216	12	0.623855	-0.204917
1371928	CsMgAuSe2	67	20	0.623811	-0.204947
544972	Sr2SiAu	225	16	0.623502	-0.205162
1753768	Cs2NaBF6	166	60	0.623299	-0.205304
1516682	K2NaAuF6	14	20	0.623279	-0.205317
947256	KSnAu	216	12	0.623208	-0.205367
582089	LiCdAs	216	12	0.622943	-0.205551
566706	CsPtPb	216	12	0.622851	-0.205616
1428761	ScTl2AgCl6	225	40	0.622544	-0.20583
1022818	SrYBeAu	216	16	0.622541	-0.205832
1438725	Na2LiRhCl6	163	20	0.622509	-0.205854
1429355	Rb2HfZrSe6	225	40	0.62172	-0.206405
699806	MgCuNiGe	216	16	0.621615	-0.206478
952299	KBaGa	216	12	0.621318	-0.206686
1374580	CsNaO2	15	16	0.621299	-0.206699
1514201	K3Rb(TeO3)2	150	12	0.620813	-0.207039
468110	MgSbPd2	225	16	0.620381	-0.207342
1432604	Cs2NaCuCl6	225	40	0.6198	-0.207749
1719188	CsCdF3	123	5	0.61975	-0.207783
17280	ScGaPd2	225	16	0.619503	-0.207957
417229	Ba2NaAg	225	16	0.619121	-0.208225
1730834	CsCdF3	140	20	0.619047	-0.208276
1571350	Cs2KI3	164	6	0.618959	-0.208338
337362	CsCl	123	2	0.618898	-0.208381
4098	Cs2NaTlF6	225	40	0.617812	-0.209143
418941	Ba2AlAg	225	16	0.617422	-0.209418
547416	NiBi2Pd	225	16	0.617386	-0.209443
1394329	K2LiGaF6	225	40	0.616788	-0.209864
952503	BaSrGa	216	12	0.616281	-0.210221
1429191	Rb2ZrScSe6	225	40	0.616152	-0.210312
899111	KAgPd	216	12	0.616081	-0.210362
1570654	Cs2RbBr3	164	6	0.616024	-0.210402
1747960	K2Hf(AgSe2)2	13	18	0.615964	-0.210445
1432677	Cs2LiAlCl6	225	40	0.615788	-0.210569
1357725	KZrAgSe3	62	24	0.615711	-0.210623
468135	NaTlPd2	225	16	0.615563	-0.210727
1482815	CsAgSe	11	6	0.615547	-0.210739
1574999	Cs2HfScSe6	225	40	0.615428	-0.210823
1442714	SrI2	189	9	0.615233	-0.21096
1516817	Cs2TlAgF6	148	30	0.61522	-0.21097
945719	BaYHg	216	12	0.615184	-0.210995
326904	CsCl	166	6	0.614878	-0.211211
1710532	Cs2NaGaF6	225	40	0.614866	-0.211219
505215	BaNaAg2	225	16	0.614346	-0.211587
881934	SrLiIn	216	12	0.614172	-0.21171
845899	NaHgTe	216	12	0.614081	-0.211775
1501486	K3Rb3(Te2S)2	189	12	0.613774	-0.211992
945322	SrLiHg	216	12	0.613754	-0.212006
1443207	BaCl2	194	6	0.613684	-0.212055
366330	KNa2Bi	225	16	0.613329	-0.212306
545533	Sr2CdAg	225	16	0.613236	-0.212372
828112	CsNaAs	216	12	0.612586	-0.212833
1546998	Rb2ScNiCl6	225	40	0.612007	-0.213243
869000	GePdAu	216	12	0.611952	-0.213283
1758772	KCuCl3	62	20	0.611945	-0.213287
1609746	Li2GePbSeS3	8	16	0.611712	-0.213453
557070	Zr2CoCu	225	16	0.611492	-0.213609
470637	K2BaSb	225	16	0.611294	-0.21375
823749	Na2TlRh	216	16	0.61121	-0.213809
913505	LiZnCd	216	12	0.610885	-0.21404
986884	NaCdSn	216	12	0.610445	-0.214354
914746	SrZnCd	216	12	0.610322	-0.214441
345493	Au3Cl	221	4	0.610317	-0.214444
1554402	KRb(CdAs)2	99	6	0.6103	-0.214456
1554853	KRbO	131	6	0.610212	-0.214519
545249	Sr2BiAu	225	16	0.609931	-0.214719
553613	BaScCd2	225	16	0.609545	-0.214994
889117	InHgTe	216	12	0.608876	-0.215471
1610452	CsK3(NaAs)2	156	8	0.608571	-0.215689
1753702	RbBaCO3F	187	7	0.607681	-0.216325
414670	Hf2CoAg	225	16	0.60765	-0.216346
1431929	Cs2ScMnBr6	225	40	0.607044	-0.21678
1254107	KHfAuSe3	63	24	0.606775	-0.216972
1554404	CsK(CdAs)2	99	6	0.606689	-0.217034
554094	BaMgCd2	225	16	0.606138	-0.217428
568106	TePtPb	216	12	0.606064	-0.217482
1544774	CsNaCl2	123	4	0.604369	-0.218698
914040	KZnSn	216	12	0.604077	-0.218908
1501503	Rb3Te2Se	189	12	0.604065	-0.218916
1367694	CsAg3Se2	164	6	0.603981	-0.218976
947626	TeAsAu	216	12	0.603516	-0.219311
951553	RbInGa	216	12	0.6034	-0.219394
506008	CsBaAg2	225	16	0.603018	-0.21967
464145	InHgPd2	225	16	0.602916	-0.219743
899147	AgPdAu	216	12	0.602593	-0.219976
1412264	Cs2NaGaF6	225	40	0.60213	-0.220309
1753238	Cs2GeTe2	72	20	0.602074	-0.22035
935918	ZnAgTe	216	12	0.601362	-0.220864
881601	KLiIn	216	12	0.601359	-0.220866
1531299	CaInAu3	188	10	0.601312	-0.2209
646364	CsCdF3	221	5	0.600682	-0.221355
900054	RbCdPd	216	12	0.599996	-0.221852
1381203	CsScCdSe3	11	12	0.599801	-0.221993
1376110	KRb2InAs2	72	24	0.599634	-0.222114
520198	SrTlGa2	225	16	0.599518	-0.222198
1501649	K3Rb3(TeS2)2	189	12	0.599501	-0.22221
899340	HgTePd	216	12	0.599284	-0.222367
1548622	CsBiTeSe	160	12	0.599235	-0.222403
1346134	CsCdF3	167	30	0.598804	-0.222715
951836	LiCdGa	216	12	0.598746	-0.222757
869060	CsTlGe	216	12	0.598523	-0.222919
1473530	Cs2Te	166	9	0.598306	-0.223077
545357	Sr2TeAu	225	16	0.59819	-0.223161
937887	NaLiAg	216	12	0.598162	-0.223181
937465	KAgTe	216	12	0.598134	-0.223201
1513456	K2Rb2ZnSb2	166	21	0.598085	-0.223237
410680	Y2CuAu	225	16	0.598033	-0.223275
1513510	Rb2Na2CdP2	166	21	0.597523	-0.223645
1513168	K2Na2I2O	139	14	0.597395	-0.223738
928520	RbSrPb	216	12	0.597145	-0.22392
936502	LiCdAg	216	12	0.596712	-0.224235
788872	ScCuPdPb	216	16	0.596531	-0.224367
1357750	CsHfAgTe3	62	24	0.595934	-0.224802
1553766	K2NaLiSe2	115	6	0.595761	-0.224928
6708	RbLiCl2	63	16	0.595551	-0.225081
867198	InGePb	216	12	0.595431	-0.225168
915078	BaLiZn	216	12	0.595249	-0.225301
1516702	K2NaYBr6	14	20	0.595045	-0.22545
1554750	K3NaSe2	115	6	0.594941	-0.225526
1612777	K4Zn2SnGe	38	16	0.594917	-0.225544
12105	Rb3CO3F	167	48	0.59483	-0.225607
1748908	Rb2BaCdSb2	26	12	0.594707	-0.225697
568136	AgTePt	216	12	0.594045	-0.22618
574232	BaNaTl	216	12	0.593868	-0.22631
1367671	K4CdSb2	166	21	0.593097	-0.226874
1553483	Cs2CaCdP2	115	6	0.592658	-0.227196
984811	RbCdSb	216	12	0.592629	-0.227217
347284	K3Mg	221	4	0.592445	-0.227352
1587659	Rb3InSeS2	12	28	0.592389	-0.227393
409906	Y2TlPt	225	16	0.592236	-0.227505
1441782	CsNaBr2	129	8	0.592111	-0.227597
952516	NaSrGa	216	12	0.592087	-0.227614
19547	Sr2InI5	140	32	0.591666	-0.227923
24754	KAg3Se2	12	24	0.591424	-0.228101
1022753	CaBeTlAu	216	16	0.591341	-0.228162
946503	BaCdAu	216	12	0.591331	-0.22817
582012	KTlAs	216	12	0.591327	-0.228172
1490688	Cs4NaCuSO2	123	9	0.590797	-0.228562
948096	RbTeAu	216	12	0.590518	-0.228767
583329	HgSbAs	216	12	0.590491	-0.228787
1358797	KScHgSe3	62	24	0.590467	-0.228804
913753	NaZnIn	216	12	0.590074	-0.229094
1357552	CsScCdSe3	62	24	0.589819	-0.229281
1708430	RbMnCl3	12	20	0.589724	-0.229351
1554219	Cs2SrMgBi2	115	6	0.589381	-0.229604
845066	CsSrTe	216	12	0.589302	-0.229662
372612	NaTl2Pt	225	16	0.589116	-0.229799
1609010	K4AgAs2Au	12	16	0.588951	-0.229921
937963	AgGePb	216	12	0.588865	-0.229984
1609472	Cs2AlBSe4	5	16	0.588639	-0.230151
346393	Na3Cl	221	4	0.588328	-0.23038
1363495	RbMnCl3	194	10	0.588276	-0.230419
947279	BaSnAu	216	12	0.588234	-0.23045
1610461	KRbNaAs	164	8	0.588134	-0.230524
1371988	K3InBi2	72	24	0.587853	-0.230731
1276779	CaIn3Au	107	10	0.58782	-0.230756
1472558	K2Te	166	18	0.587727	-0.230824
582591	KAsAu	216	12	0.587725	-0.230826
1610443	CsKNaAs	187	8	0.58748	-0.231007
418882	Ba2AgTe	225	16	0.587431	-0.231043
543419	Sr2TlAg	225	16	0.58742	-0.231051
947619	SrSnAu	216	12	0.58736	-0.231096
1647803	Cs3KBr4	6	8	0.587212	-0.231205
410062	NaY2Pd	225	16	0.587025	-0.231343
1721359	SrRuO3	74	20	0.586763	-0.231537
520680	KGa2Bi	225	16	0.586405	-0.231802
1022611	BaCaYAu	216	16	0.586001	-0.232102
544671	Sr2AgPb	225	16	0.585629	-0.232377
445759	BaLi2Au	225	16	0.585563	-0.232426
521091	CaGa2Pd	225	16	0.585474	-0.232493
454902	BaCaIn2	225	16	0.585403	-0.232545
1731704	Cs2Hf(AgTe2)2	21	18	0.58501	-0.232837
506947	BaCaAg2	225	16	0.584326	-0.233345
1752720	RbNaZnO2	14	20	0.584204	-0.233435
1279976	Rb2MgCl4	139	14	0.584082	-0.233526
1556095	CsRbTe	160	9	0.583526	-0.23394
898765	CsBaPd	216	12	0.583292	-0.234114
1243673	GaBr	194	4	0.58289	-0.234413
344127	Tl3Pb	221	4	0.582696	-0.234558
545132	Sr2LiTl	225	16	0.582276	-0.234871
1571352	CsK2I3	164	6	0.582046	-0.235043
1575877	NaTl2SiCl6	225	40	0.581955	-0.23511
1017876	KNa2Bi	59	8	0.581858	-0.235183
1670393	Rb2ZrAg2(TeS)2	5	18	0.581599	-0.235376
913863	KSrZn	216	12	0.581572	-0.235396
914469	KZnTe	216	12	0.581207	-0.235669
1750215	K2HfHgSe4	121	16	0.581061	-0.235778
1531116	Ba3TlZn	194	10	0.580858	-0.23593
1666789	Cs2AlAgCl6	148	30	0.580626	-0.236104
1554468	Cs2Cd2AsP	99	6	0.580219	-0.236408
942692	KRbAl	216	12	0.579769	-0.236745
913603	ZnInSb	216	12	0.57974	-0.236767
567930	HgTePt	216	12	0.579033	-0.237297
1554794	K3LiTe2	115	6	0.578958	-0.237353
1733053	Ga2PbS4	66	28	0.578102	-0.237996
796581	YCuSnAu	216	16	0.578049	-0.238035
1372971	CsTe2Au3	164	6	0.577945	-0.238113
881693	LiCdTe	216	12	0.577839	-0.238193
1493275	ZrTlTe2AuSe	11	12	0.577754	-0.238257
418468	KBa2Te	225	16	0.577497	-0.23845
1228139	CsAu	187	2	0.577439	-0.238494
1556100	CsRbO	160	9	0.57742	-0.238508
880291	NaLiGa	216	12	0.57717	-0.238696
1387965	RbNaO	139	24	0.577118	-0.238736
946440	RbInAu	216	12	0.57694	-0.238869
453707	KSrIn2	225	16	0.57682	-0.23896
899200	BaPdPb	216	12	0.576776	-0.238993
1430819	Cs2ZnSnF6	225	40	0.576493	-0.239206
1444093	Cs2Na3Cl5	44	20	0.57617	-0.23945
1374046	Cs2PdSe2	71	10	0.575775	-0.239747
676610	Cs4Na2ScGaF12	166	60	0.575525	-0.239936
1748905	K2BaSb2Pb	26	12	0.575437	-0.240002
583161	NaTlAs	216	12	0.574912	-0.240399
1755579	K2MnCdSe4	121	16	0.574437	-0.240758
371736	KYTl2	225	16	0.574263	-0.240889
1618973	CsKZnF4	107	14	0.573797	-0.241241
1430906	Cs2SrPdF6	225	40	0.573746	-0.24128
580724	RbTlSi	216	12	0.573726	-0.241295
844871	RbTePb	216	12	0.573462	-0.241495
1444090	Cs3Na2Cl5	8	20	0.573108	-0.241763
1348476	Cs2BeCl4	62	28	0.572973	-0.241866
545008	Sr2SiPt	225	16	0.572243	-0.24242
1545016	CsKF2	123	4	0.572201	-0.242452
1347098	Cs2Cd3S4	72	36	0.572155	-0.242486
365486	SrInPt2	225	16	0.57192	-0.242665
1377436	RbGaTe2	15	64	0.571793	-0.242761
889055	CdInSb	216	12	0.571681	-0.242846
308911	Ba3Au	225	16	0.571609	-0.242901
899561	InAgPd	216	12	0.57157	-0.24293
826814	RbNaO3	167	30	0.571488	-0.242993
1014483	Sr2BiAu	58	24	0.571468	-0.243008
543458	RbSr2In	225	16	0.571437	-0.243031
1444088	Rb2LiCl3	63	24	0.571375	-0.243079
917804	NaCdSb	216	12	0.571359	-0.243091
1004756	YMgGaPt	216	16	0.571314	-0.243125
1345676	CsNaO	139	24	0.571081	-0.243303
582083	TlSnAs	216	12	0.57099	-0.243372
410956	NaY2Pt	225	16	0.570666	-0.243618
1383715	CsLiBr2	63	16	0.570104	-0.244046
1541465	Cs2NaHgF6	225	40	0.570056	-0.244082
1541922	Cs2NaHgF6	2	20	0.56985	-0.24424
880806	KLiSn	216	12	0.569483	-0.244519
463207	SrMgPd2	225	16	0.569479	-0.244522
544134	RbSr2Pb	225	16	0.569282	-0.244673
897537	SrPdPb	216	12	0.568768	-0.245065
410258	Y2InPt	225	16	0.568612	-0.245184
1255994	YPbAuSe3	63	24	0.568531	-0.245246
917606	TlSbTe	216	12	0.568161	-0.245529
1586947	BaCaSbAu	62	16	0.56813	-0.245553
1748815	B2PbS4	9	28	0.567993	-0.245657
899402	HgSbPd	216	12	0.567934	-0.245702
888403	KBaIn	216	12	0.567723	-0.245863
543450	KSr2Pb	225	16	0.567559	-0.245989
845094	CsBaTe	216	12	0.56743	-0.246088
1371697	K3YBr6	148	30	0.567227	-0.246243
953131	TlGaSb	216	12	0.567122	-0.246323
2290	CsMnBr3	194	10	0.566634	-0.246697
373039	BaCaTl2	225	16	0.566564	-0.246751
1384473	K3BSe3	11	14	0.566432	-0.246852
1571353	KRb2I3	164	6	0.566185	-0.247042
1429416	Cs2YScSe6	225	40	0.566154	-0.247066
1442211	RbI	194	4	0.565869	-0.247284
1713916	CsMnBr3	12	20	0.565727	-0.247393
418920	Ba2CdTe	225	16	0.565698	-0.247416
946143	ZnTeAu	216	12	0.565609	-0.247484
880738	KBaLi	216	12	0.565312	-0.247712
555515	BaYCd2	225	16	0.56529	-0.247729
1514368	KRb2Sb2Au3	166	24	0.565038	-0.247922
914188	NaSrZn	216	12	0.56503	-0.247928
1541466	Cs2NaHgF6	225	40	0.564892	-0.248034
1586921	BaCaSnHg	62	16	0.564542	-0.248304
913413	ZnGaSb	216	12	0.564491	-0.248343
937059	BaAgSn	216	12	0.564318	-0.248476
468720	SrInPd2	225	16	0.564206	-0.248562
951576	RbGaSb	216	12	0.563933	-0.248772
1554749	CsK3Se2	115	6	0.563931	-0.248774
1611870	BaAgSnAuSe4	5	16	0.563767	-0.2489
463481	CaHfPd2	225	16	0.563457	-0.249139
898489	KCdPd	216	12	0.563311	-0.249252
583127	BaAsPb	216	12	0.563246	-0.249302
411328	Y2PbAu	225	16	0.563184	-0.24935
347801	Na3Te	221	4	0.563154	-0.249373
583287	RbTlAs	216	12	0.563116	-0.249402
468578	SrScPd2	225	16	0.562746	-0.249687
897654	TlGaPd	216	12	0.562627	-0.24978
1022558	BaMgScAu	216	16	0.562614	-0.249789
545298	Sr2TlTe	225	16	0.562529	-0.249855
566467	RbInPt	216	12	0.562216	-0.250097
1516696	K2NaScBr6	14	20	0.56205	-0.250225
925614	RbCdSn	216	12	0.561954	-0.250299
1516966	Cs2NaHgF6	87	20	0.561893	-0.250347
1545042	KNaBr2	123	4	0.561758	-0.250451
1753223	Rb2GeTe2	72	20	0.561621	-0.250556
1115265	Ba2TlNi	216	16	0.561022	-0.25102
789735	YCuSnRh	216	16	0.560661	-0.251299
444919	Ca2MgAu	225	16	0.559985	-0.251824
1755589	K2TiCdSe4	121	16	0.559913	-0.25188
1570939	Cs3HI2	164	6	0.559803	-0.251965
1553115	K2Na2TeSe	99	6	0.559139	-0.252481
1623717	CsRbLi2Br4	38	16	0.55893	-0.252642
1538613	RbBCl3	74	20	0.558863	-0.252694
567740	CsHgPt	216	12	0.557907	-0.253438
1647837	Cs2ICl	11	8	0.557862	-0.253473
567086	KCdPt	216	12	0.557774	-0.253541
442841	RbCa2In	225	16	0.557497	-0.253757
309801	Sr3Au	225	16	0.557304	-0.253908
482215	BaNaZn2	225	16	0.556968	-0.25417
22059	CsFeBr3	63	20	0.556916	-0.25421
545605	NaSr2Te	225	16	0.556753	-0.254338
417613	Ba2HgGe	225	16	0.556675	-0.254398
1346897	CsCaF3	194	30	0.556585	-0.254469
1376593	Cs2CdF4	139	14	0.55633	-0.254668
1721070	CsFeBr3	12	20	0.556208	-0.254763
7327	K5As2Au	194	16	0.555868	-0.255029
15925	RbAg3Se2	12	24	0.555856	-0.255038
1670395	CsRbZr(AgTe2)2	3	9	0.555855	-0.255038
1033073	NaSrNiBi	216	16	0.555702	-0.255158
1038388	SrSbAu	216	12	0.555522	-0.255298
868524	BaGePb	216	12	0.554956	-0.255742
1482754	CsScBr3	74	20	0.554152	-0.256371
1514360	Cs2RbAg3Bi2	166	24	0.553729	-0.256703
575741	KTlIn	216	12	0.553594	-0.256809
930171	KNaPb	216	12	0.553315	-0.257027
1377184	K3ScBr6	148	30	0.553243	-0.257084
951432	BaGaHg	216	12	0.552875	-0.257373
899555	NaLiPd	216	12	0.552821	-0.257415
1378004	K3YCl6	148	30	0.552721	-0.257494
898738	CsSrPd	216	12	0.55272	-0.257495
1257651	CsScCdSe3	63	24	0.552219	-0.257888
1554913	Rb4TeSe	123	6	0.552141	-0.25795
418727	Ba2MgZn	225	16	0.551885	-0.258151
952163	KCdGa	216	12	0.551654	-0.258333
314760	Na3Te	225	16	0.551242	-0.258658
444318	RbCa2Tl	225	16	0.551177	-0.258709
418478	Ba2SiAg	225	16	0.550967	-0.258874
1570656	Cs2KBr3	164	6	0.550765	-0.259034
1445362	SrAsPt	189	9	0.550519	-0.259228
1430945	Cs2KZnF6	225	40	0.550355	-0.259357
1731311	K2AsAu	20	16	0.549332	-0.260165
952623	GaSnPb	216	12	0.549239	-0.260239
645569	CsTiBr3	194	10	0.549233	-0.260243
1744053	Cs2Zn3Se4	69	36	0.549209	-0.260262
1016588	Ba2CaHg	216	16	0.548426	-0.260882
545072	KSr2In	225	16	0.548299	-0.260982
581679	BaHgAs	216	12	0.547815	-0.261366
1610	Cs3MnCl5	140	36	0.547701	-0.261457
416881	Ba2HgBi	225	16	0.547451	-0.261654
1490763	CsYHgSe2S	63	24	0.547378	-0.261713
995867	LiCaSbPd	216	16	0.547242	-0.261821
545244	BaSr2Pt	225	16	0.547225	-0.261834
417632	Ba2AgHg	225	16	0.546114	-0.262717
313785	Ba3Pt	225	16	0.545929	-0.262864
868737	CdSnGe	216	12	0.545897	-0.262889
1404906	RbNaSO4	173	14	0.545489	-0.263214
418360	Ba2TlCu	225	16	0.545484	-0.263218
868685	RbTlGe	216	12	0.545449	-0.263246
913239	RbZnSb	216	12	0.54528	-0.263381
917334	SnHgSb	216	12	0.54527	-0.263388
370957	SrTl2Ga	225	16	0.545137	-0.263494
1441362	CsNa2Br3	71	12	0.544718	-0.263828
[truncated: 1,219 more rows]
